# Supplementary material for: Calibration methods for laser ablation Rb–Sr geochronology: comparisons and recommendation based on NIST glass and natural reference materials
Source: Copernicus journal article supplement (doi:10.5194/gchron-6-21-2024), 2024-01-17

Downhole Rb/Sr ratio for NIST-610 glass

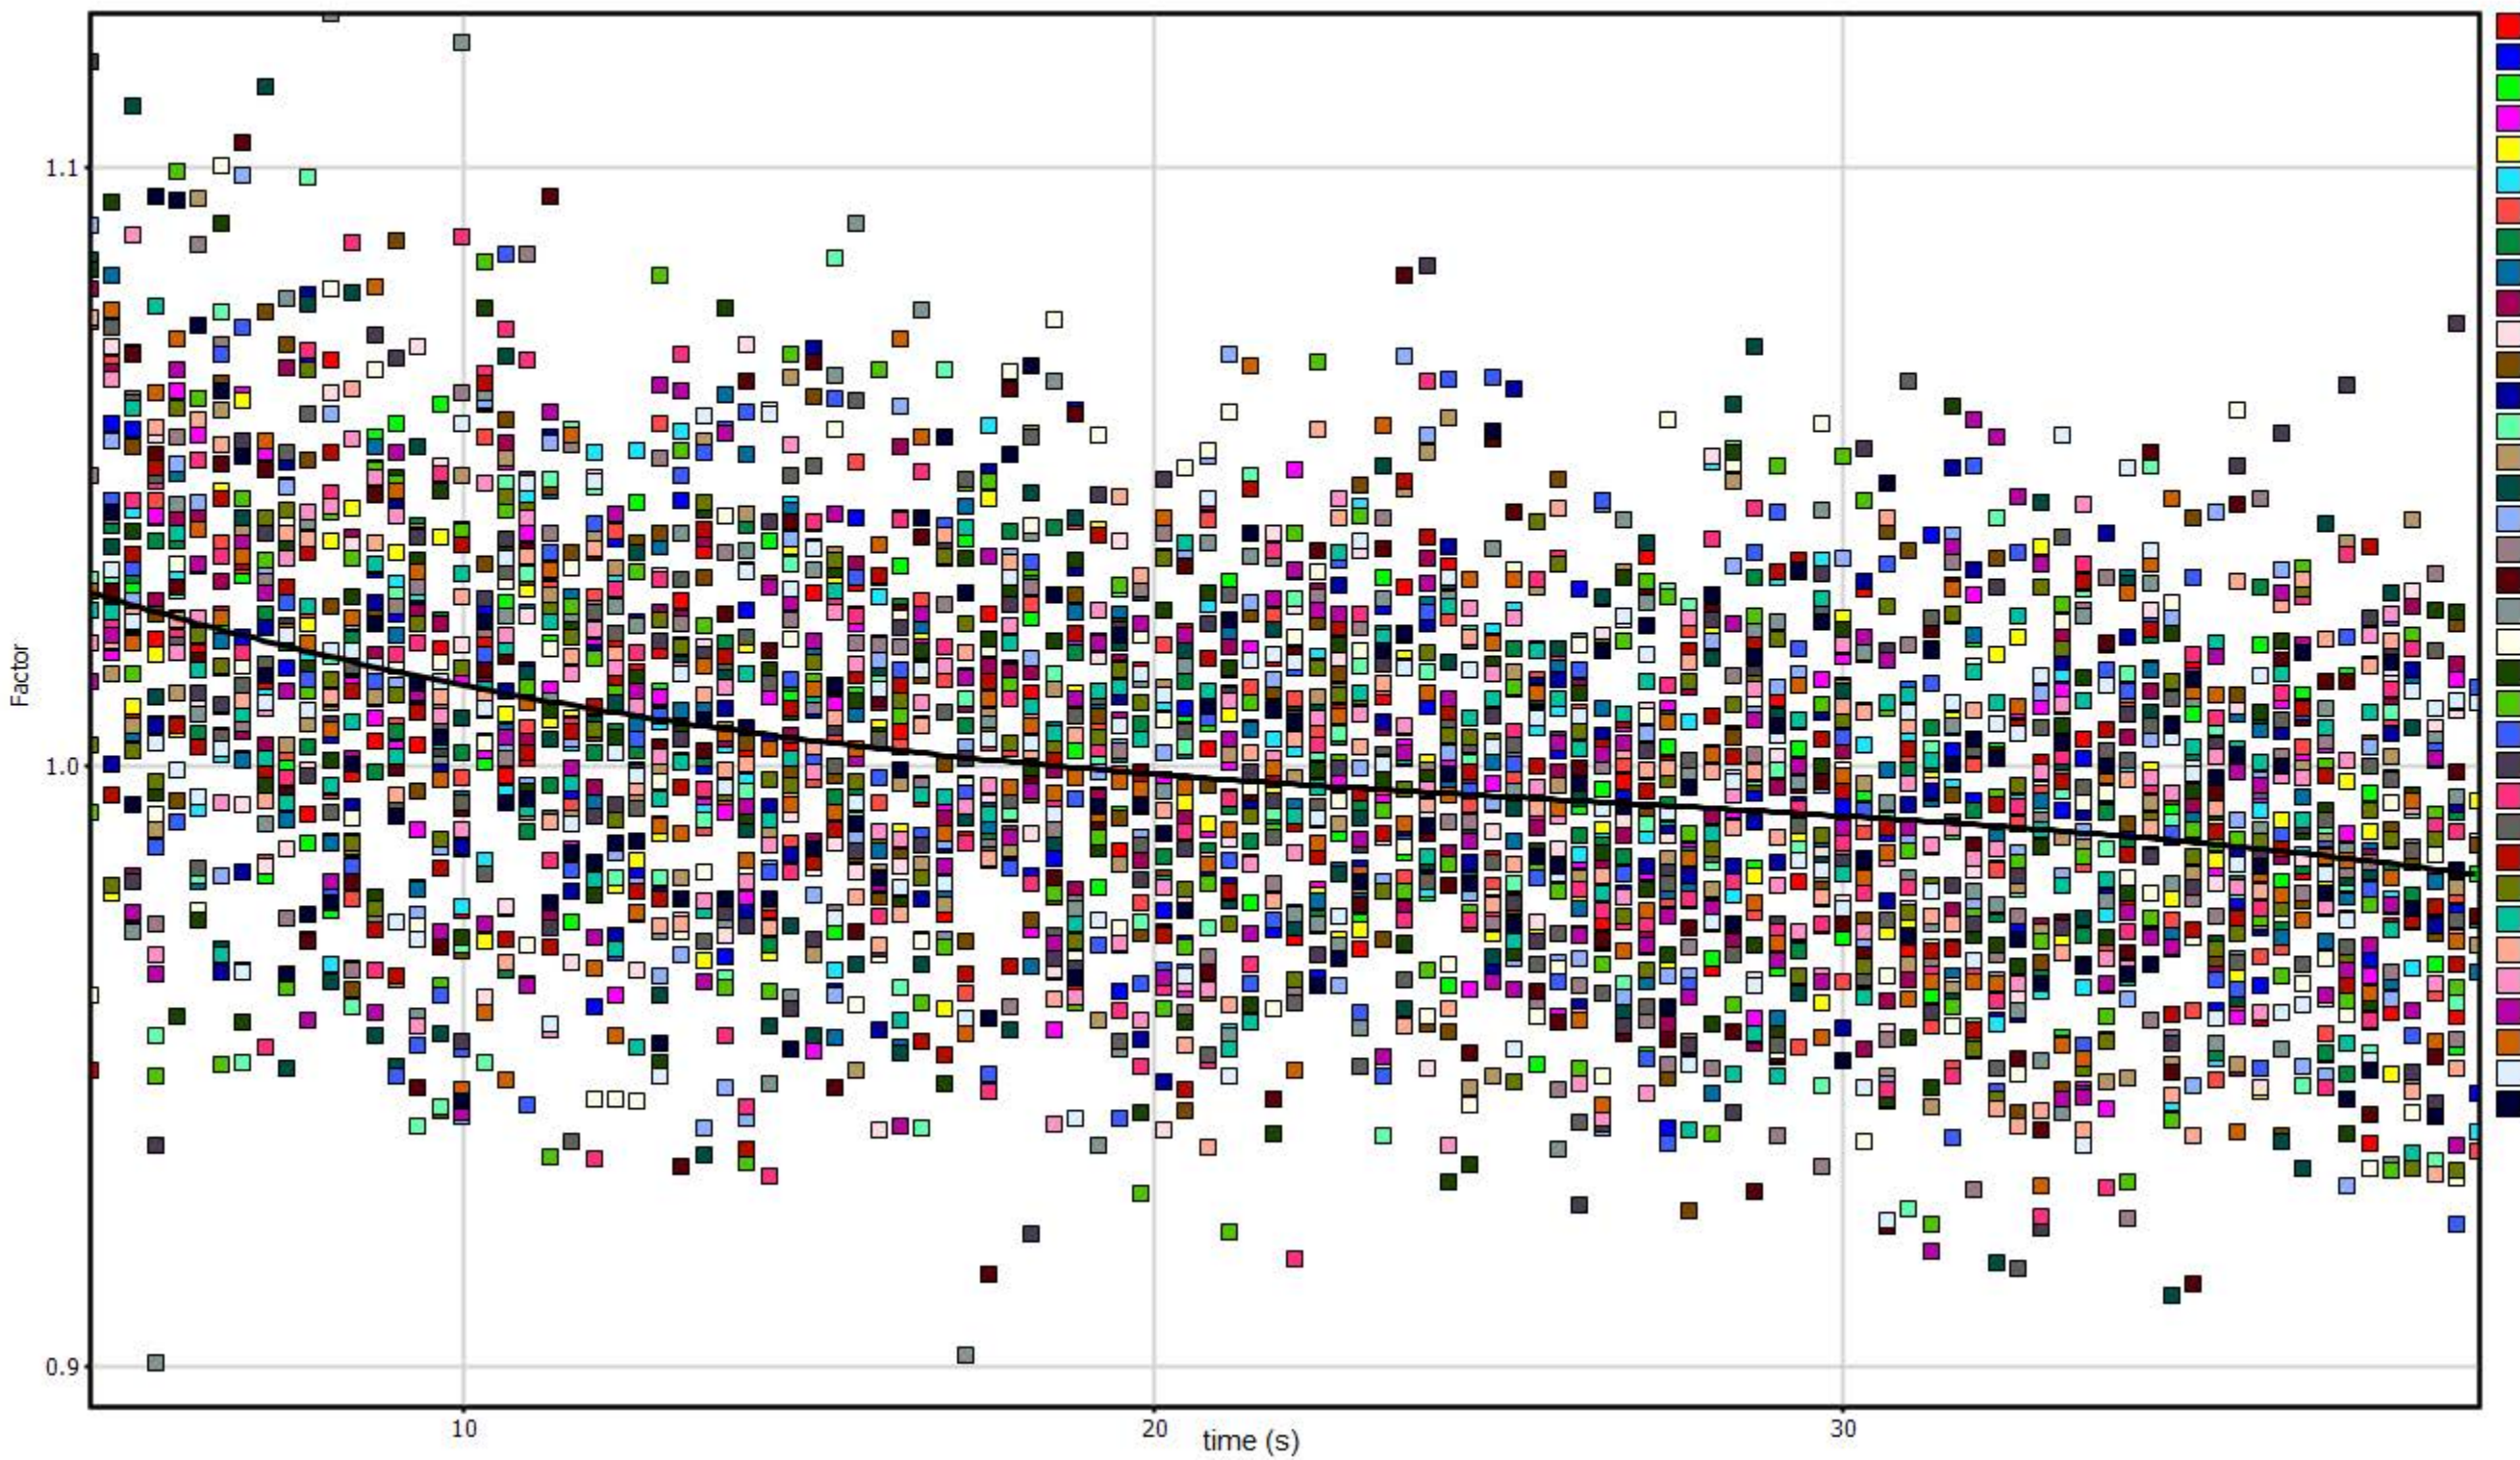

Downhole Rb/Sr ratio for Mica-Mg nanopowder pellet

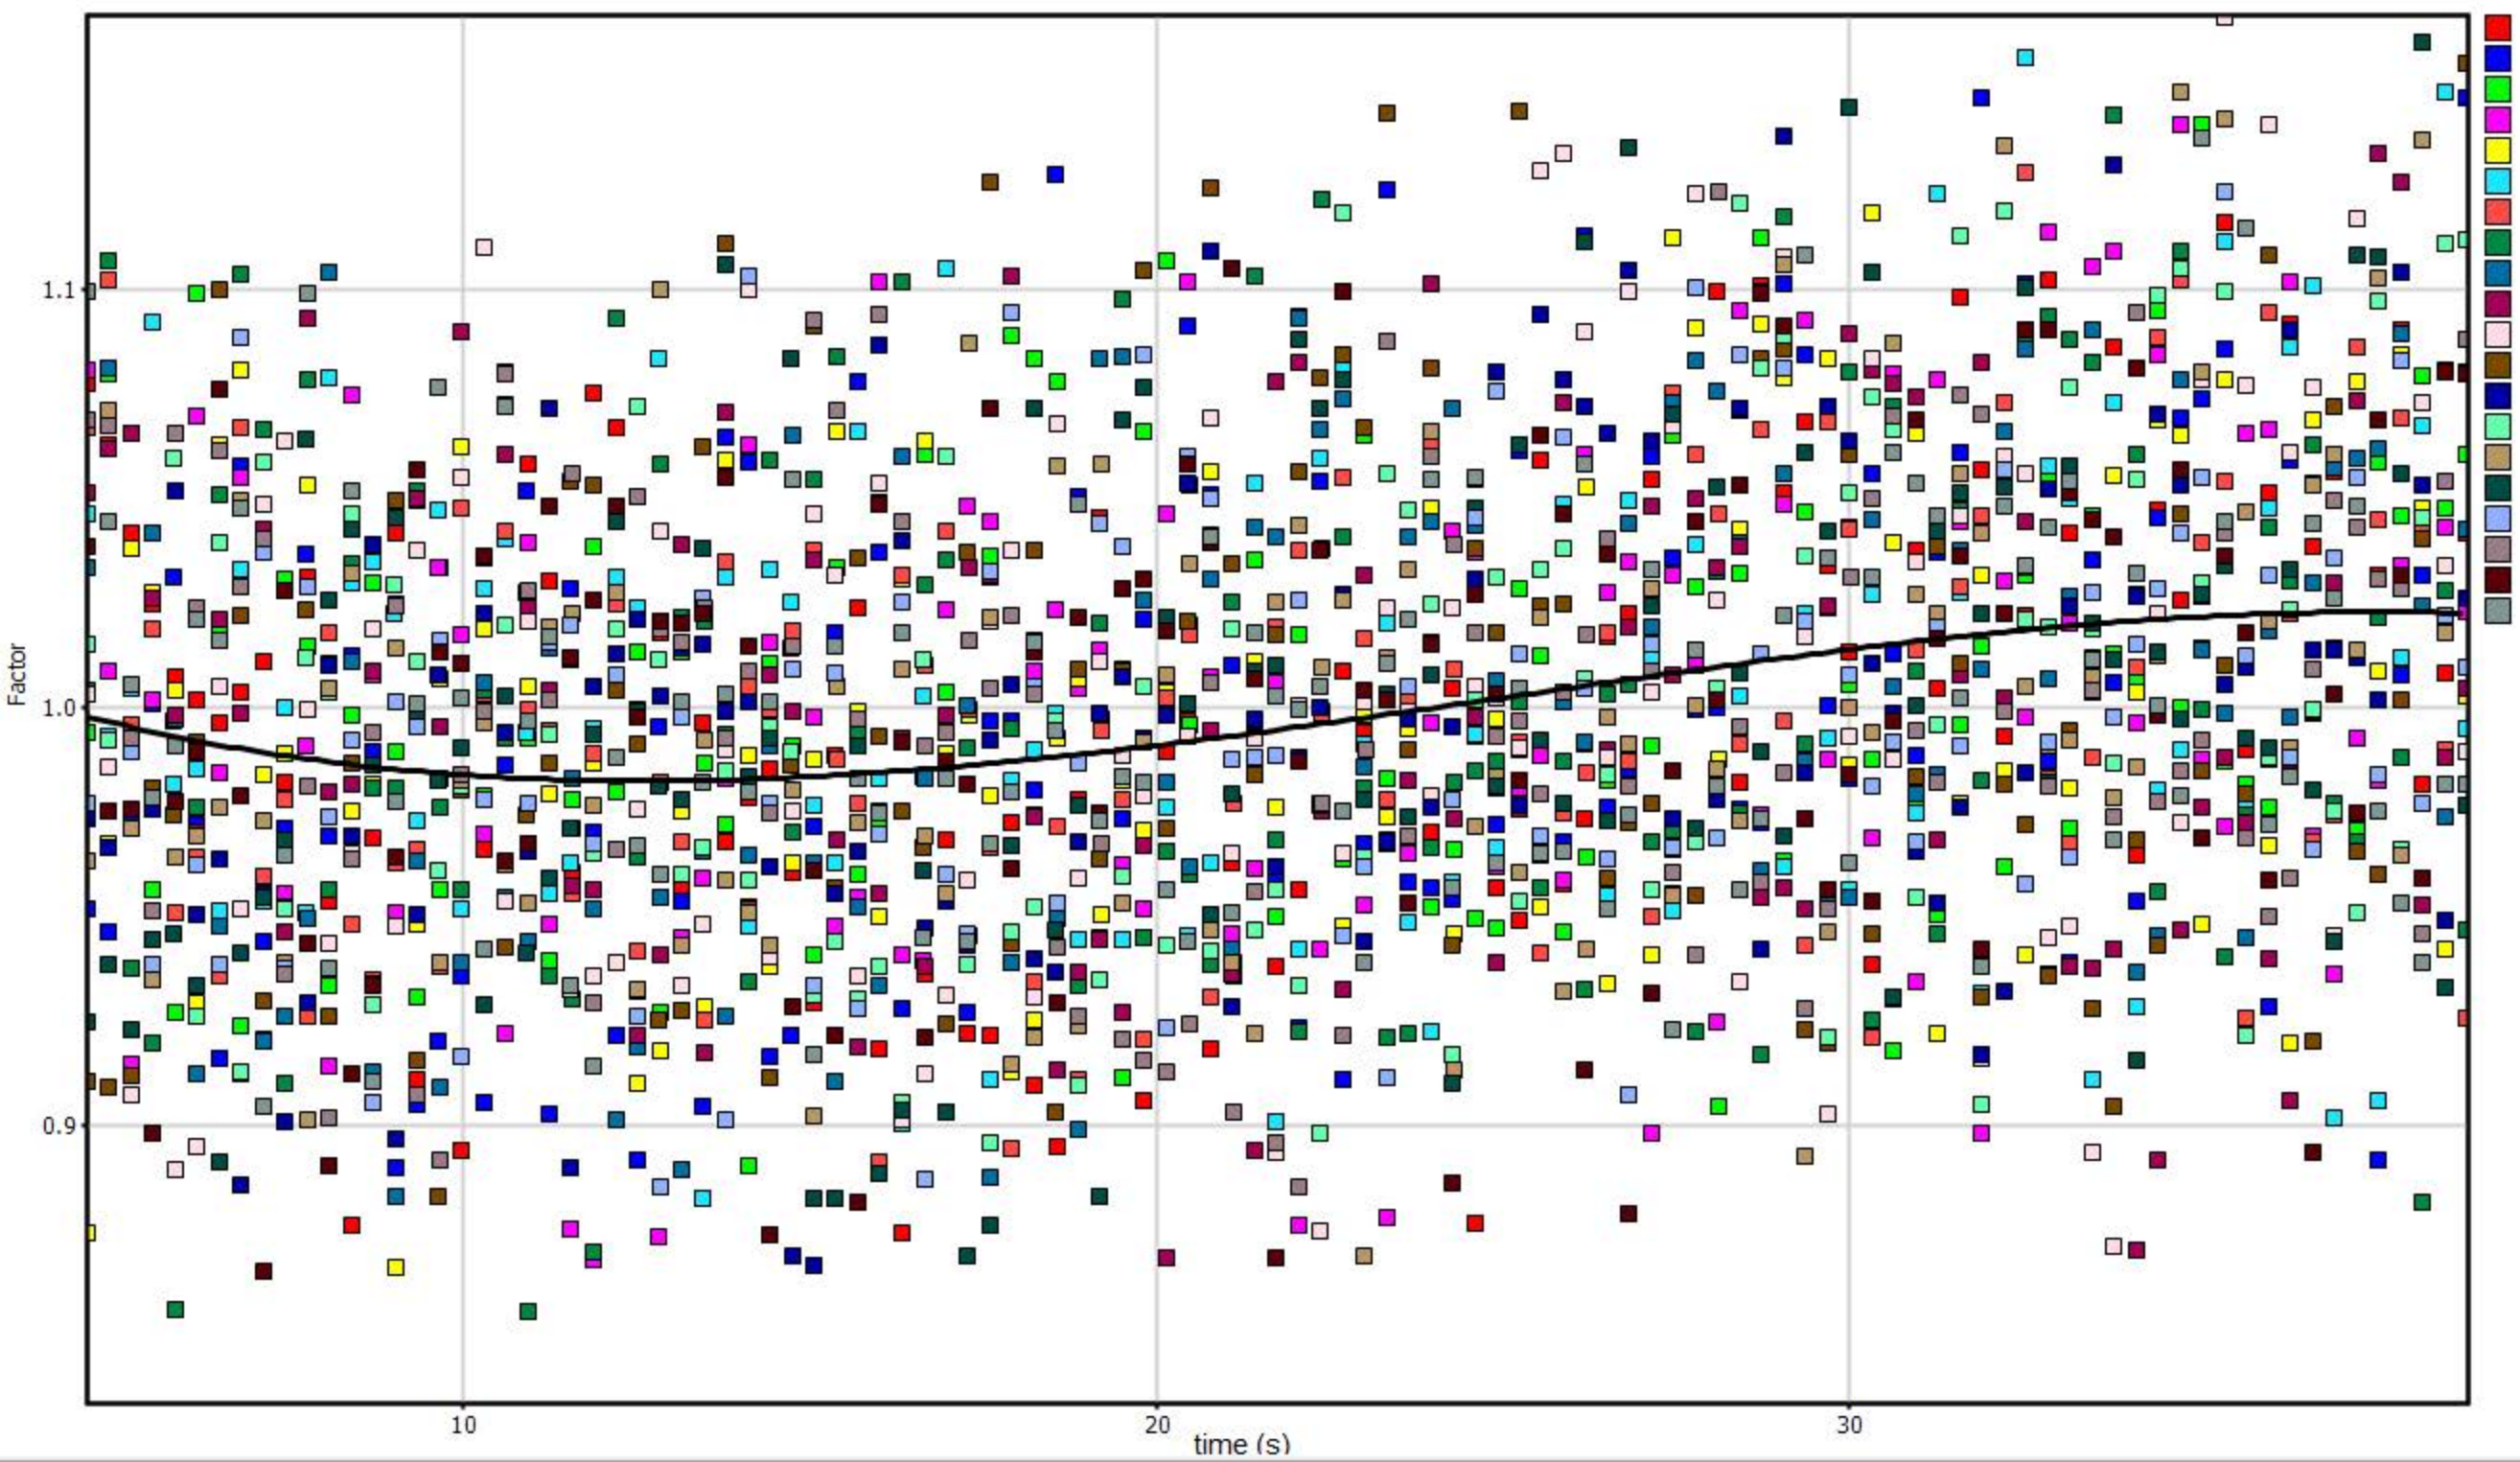

Downhole Rb/Sr ratio for MDC phlogopite

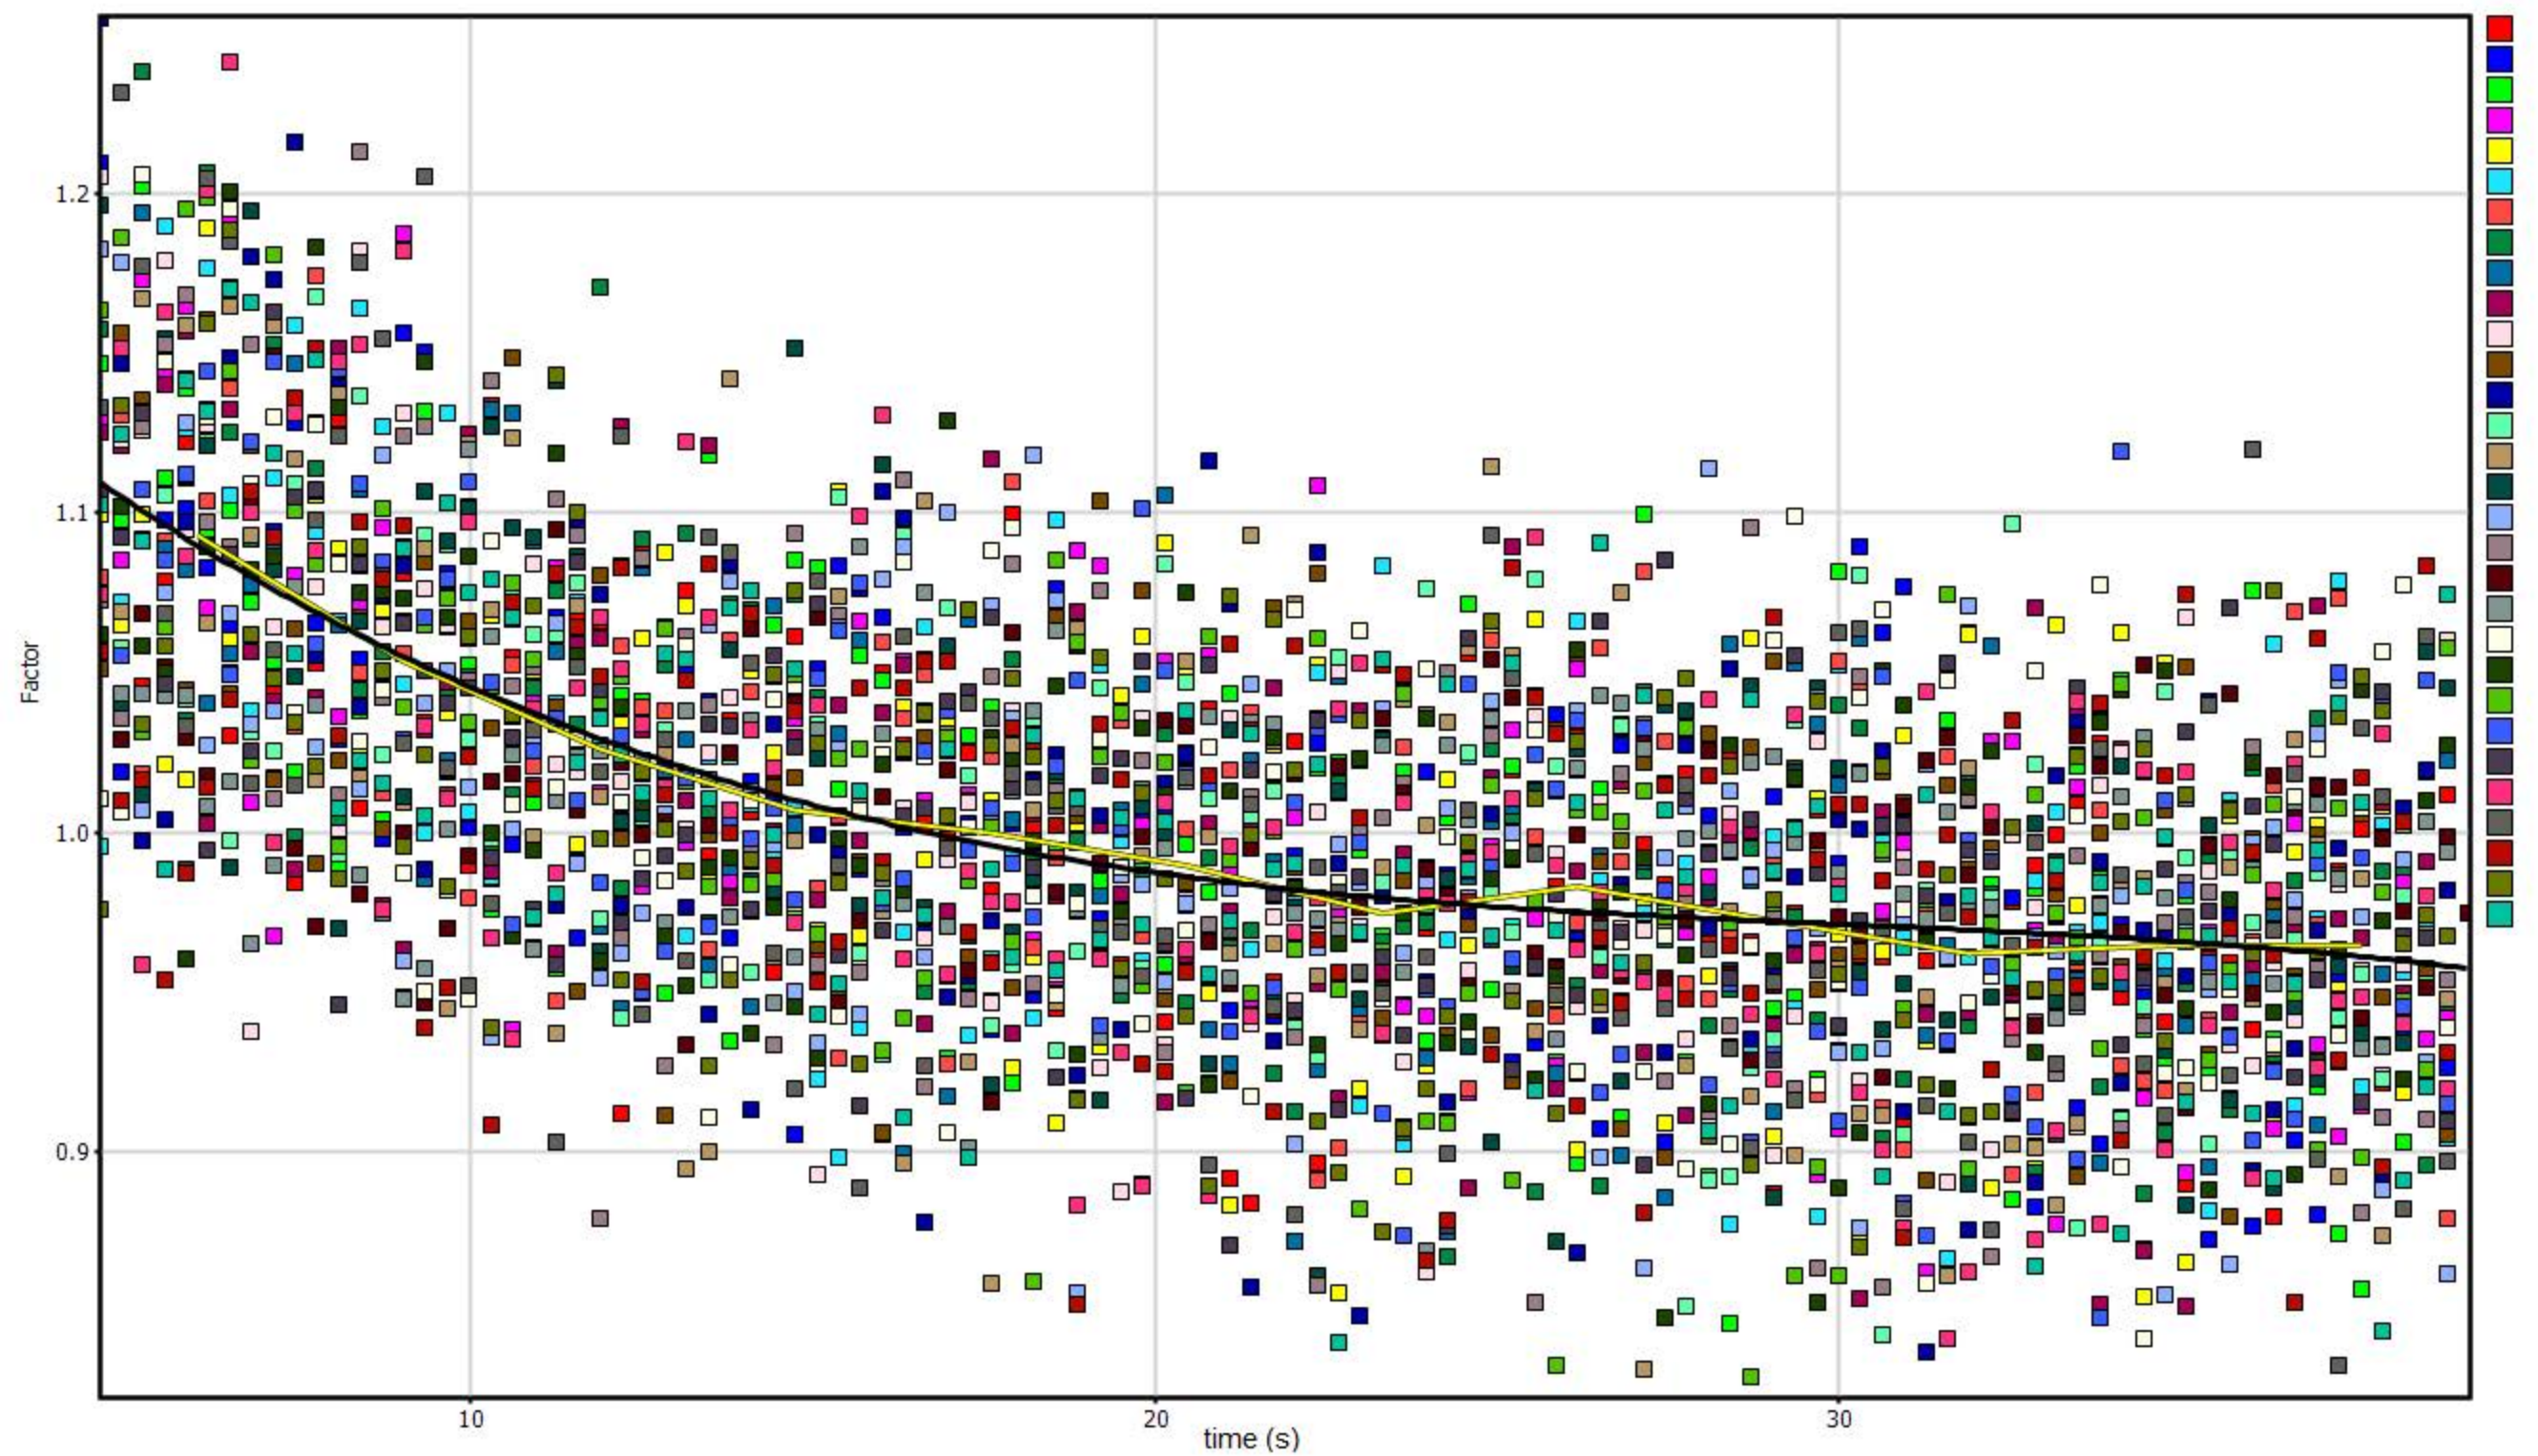

Downhole Rb/Sr ratio for Entire Creek biotite

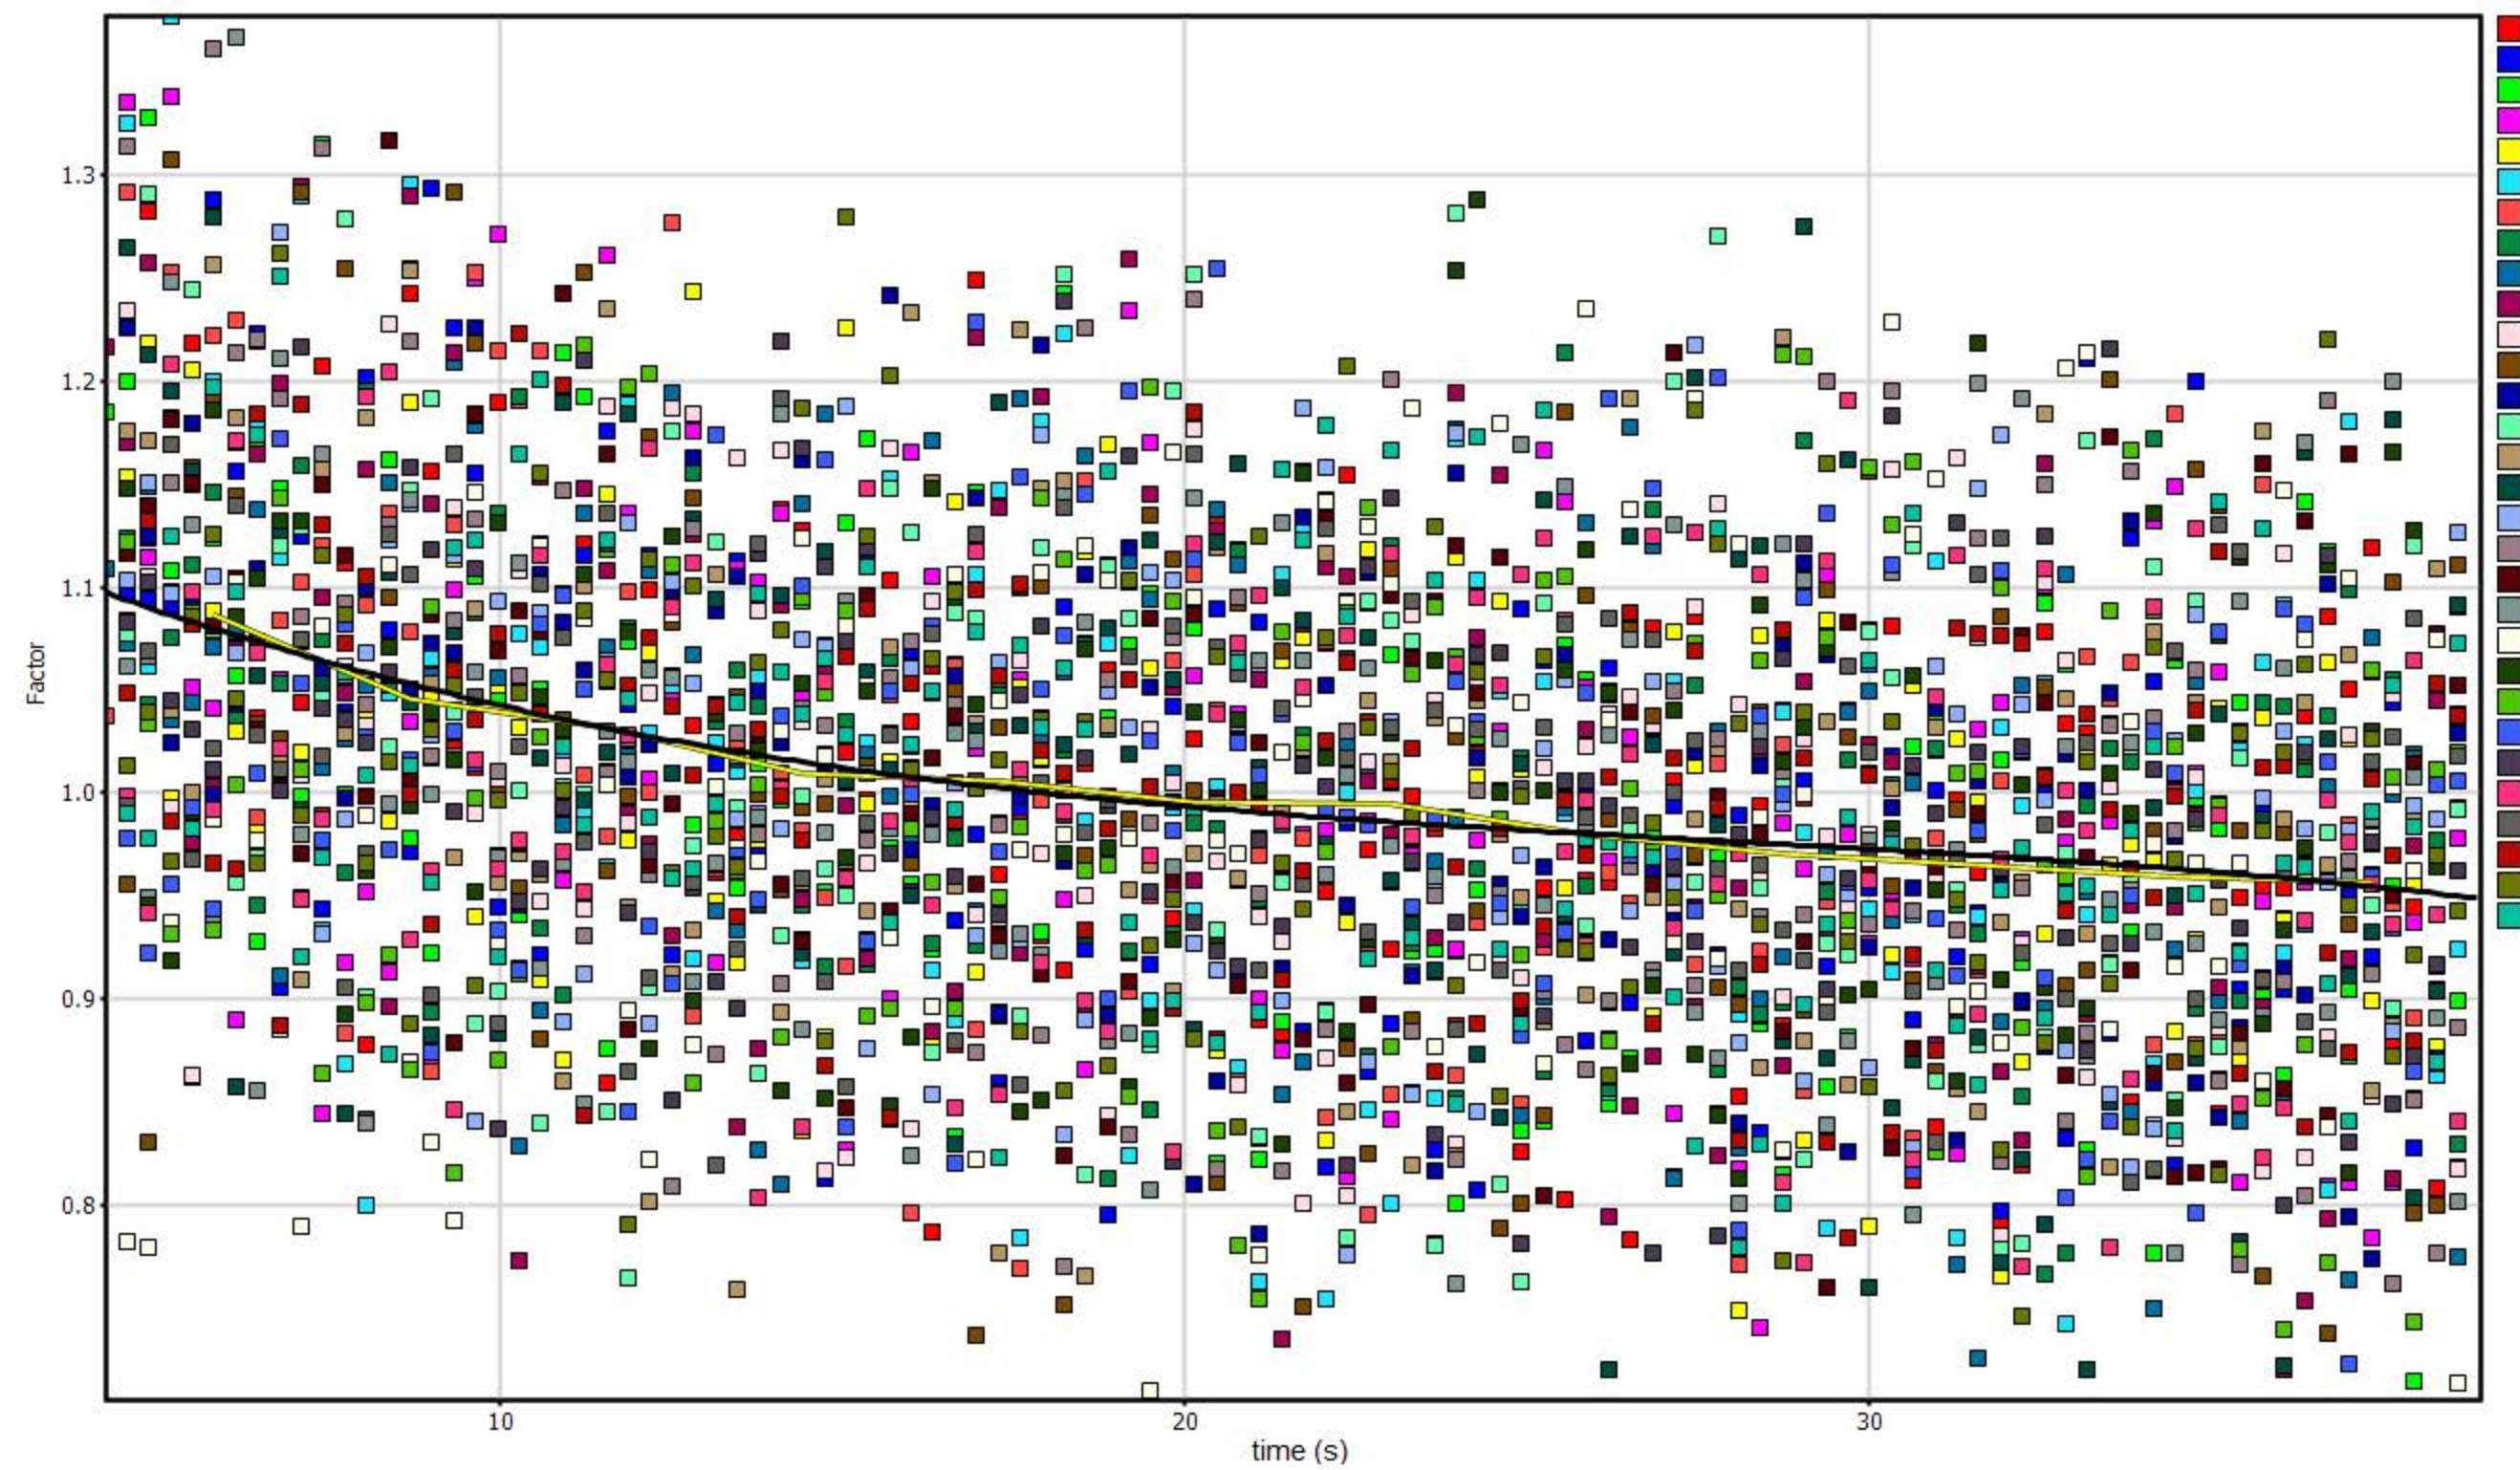

Downhole Rb/Sr ratio for Bund6a biotite

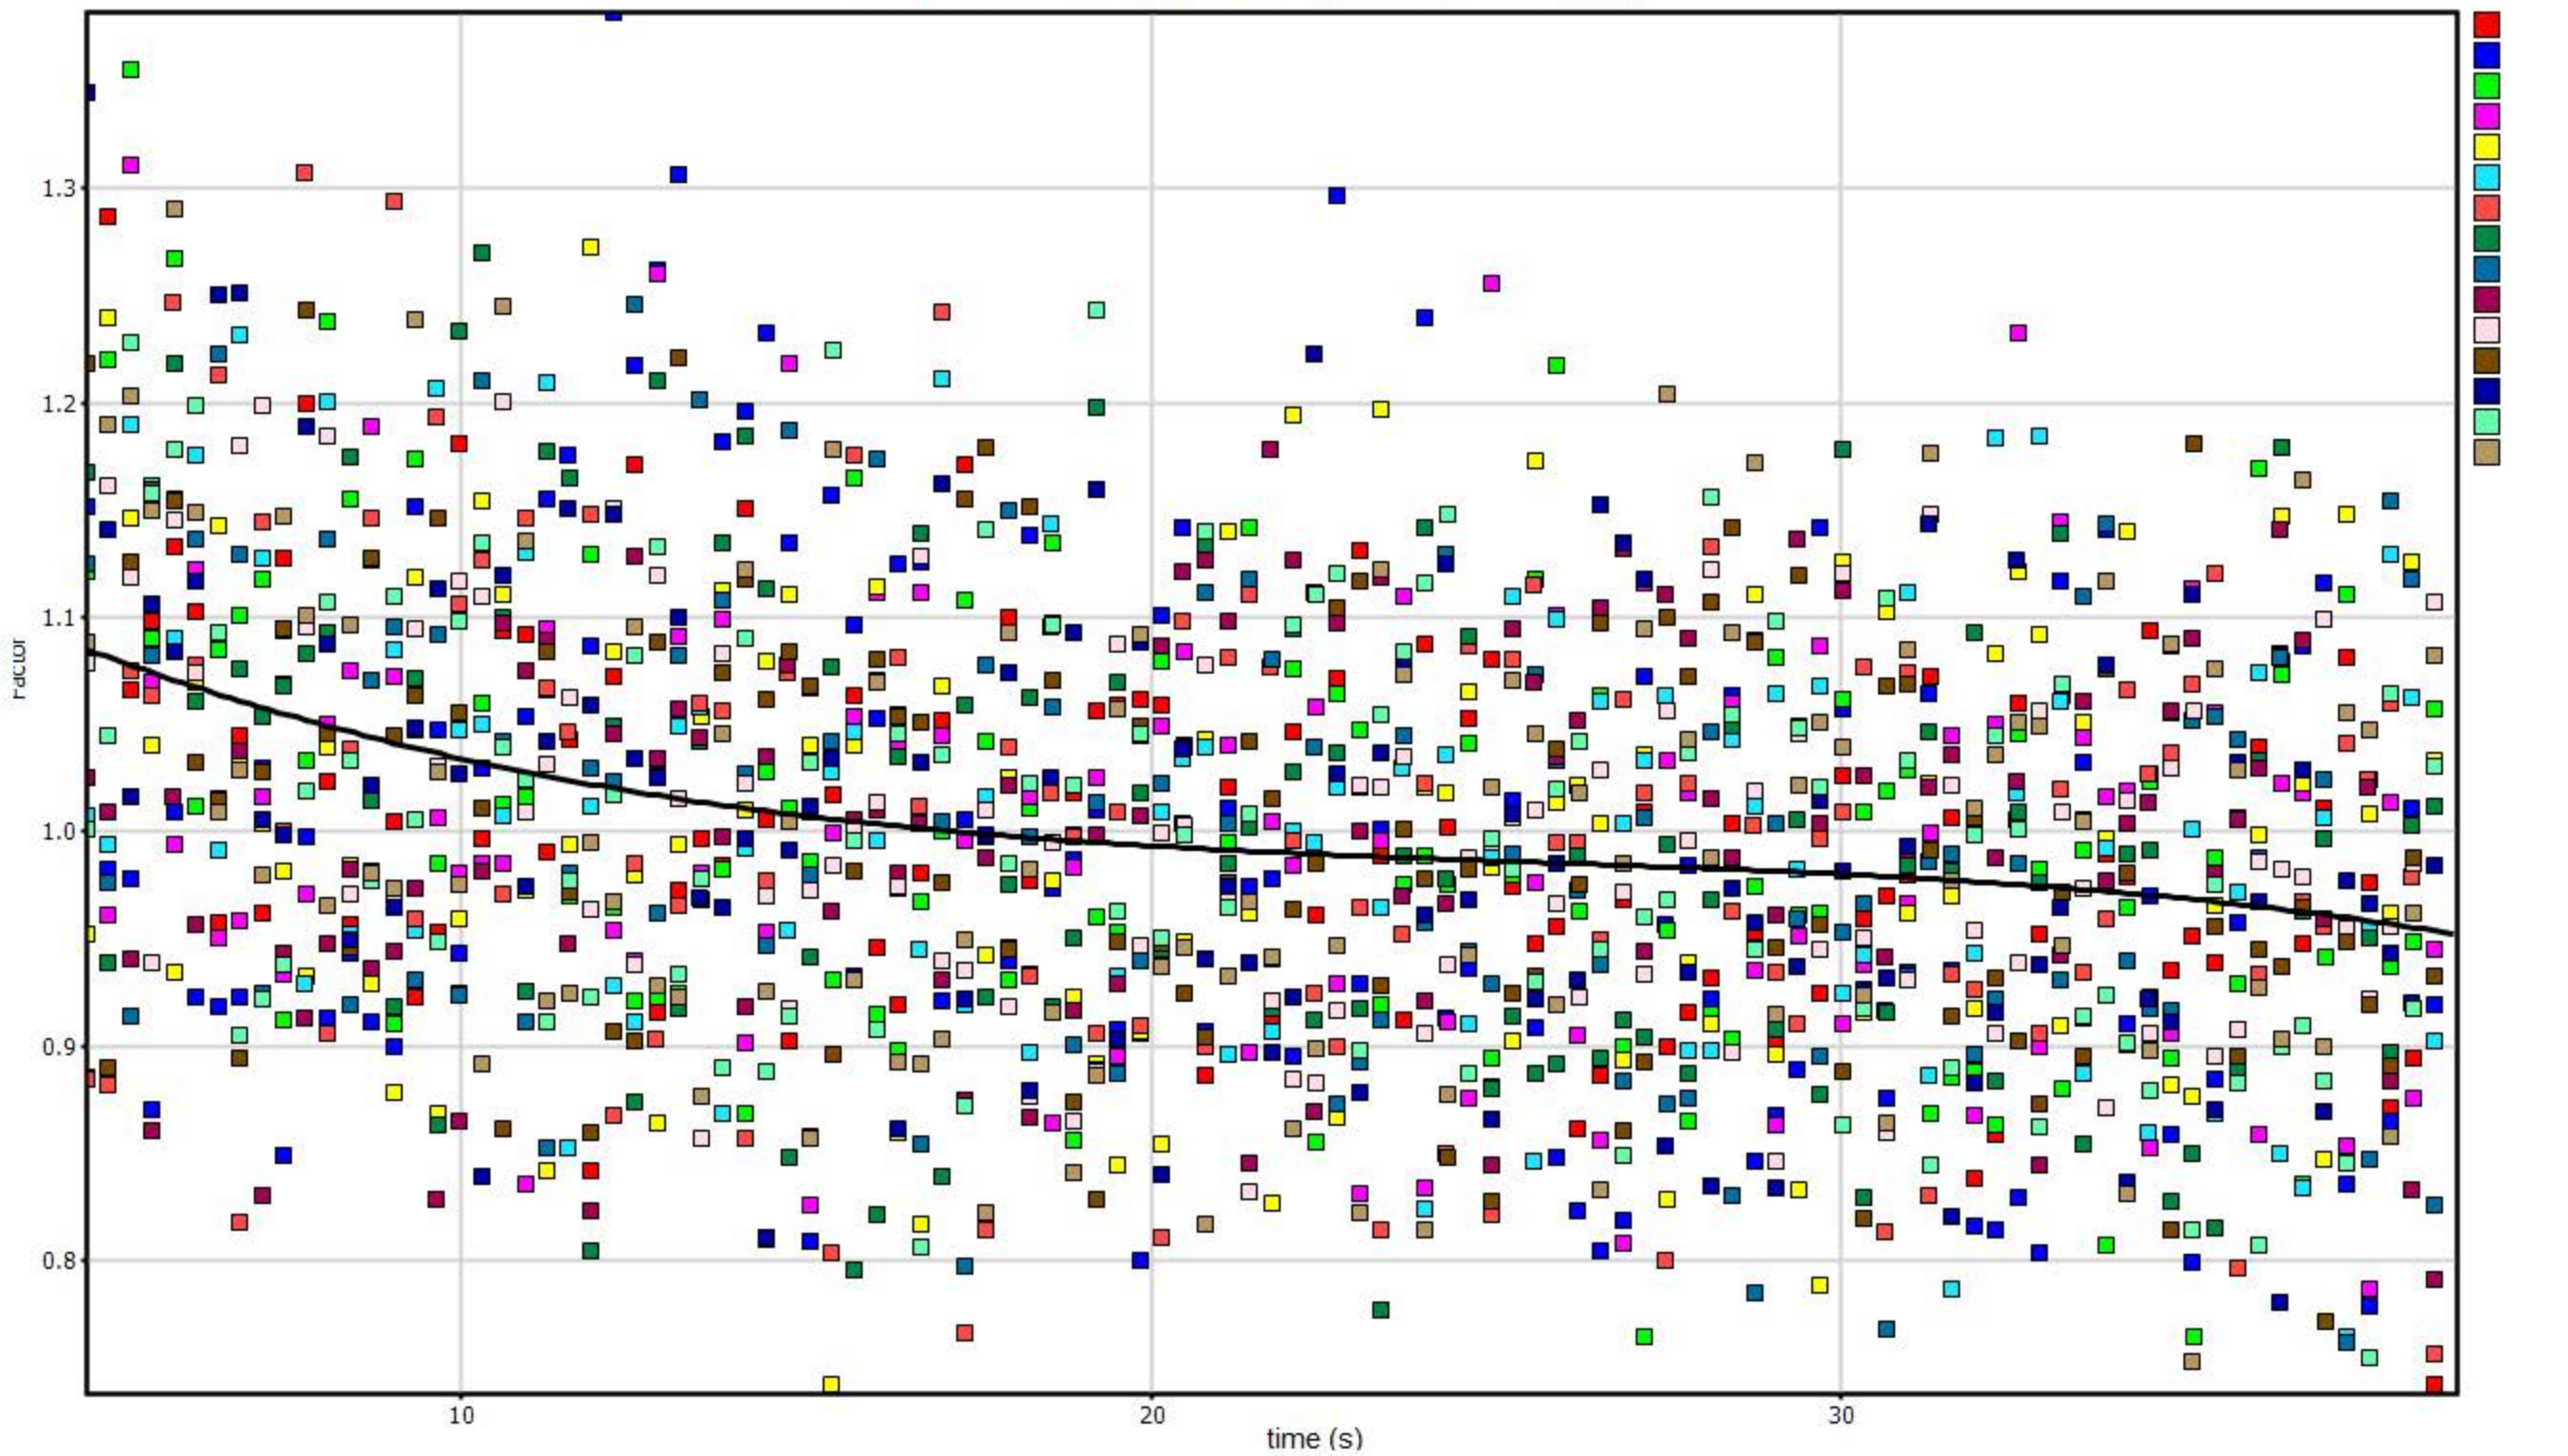

Downhole Rb/Sr ratio for Bund1b biotite

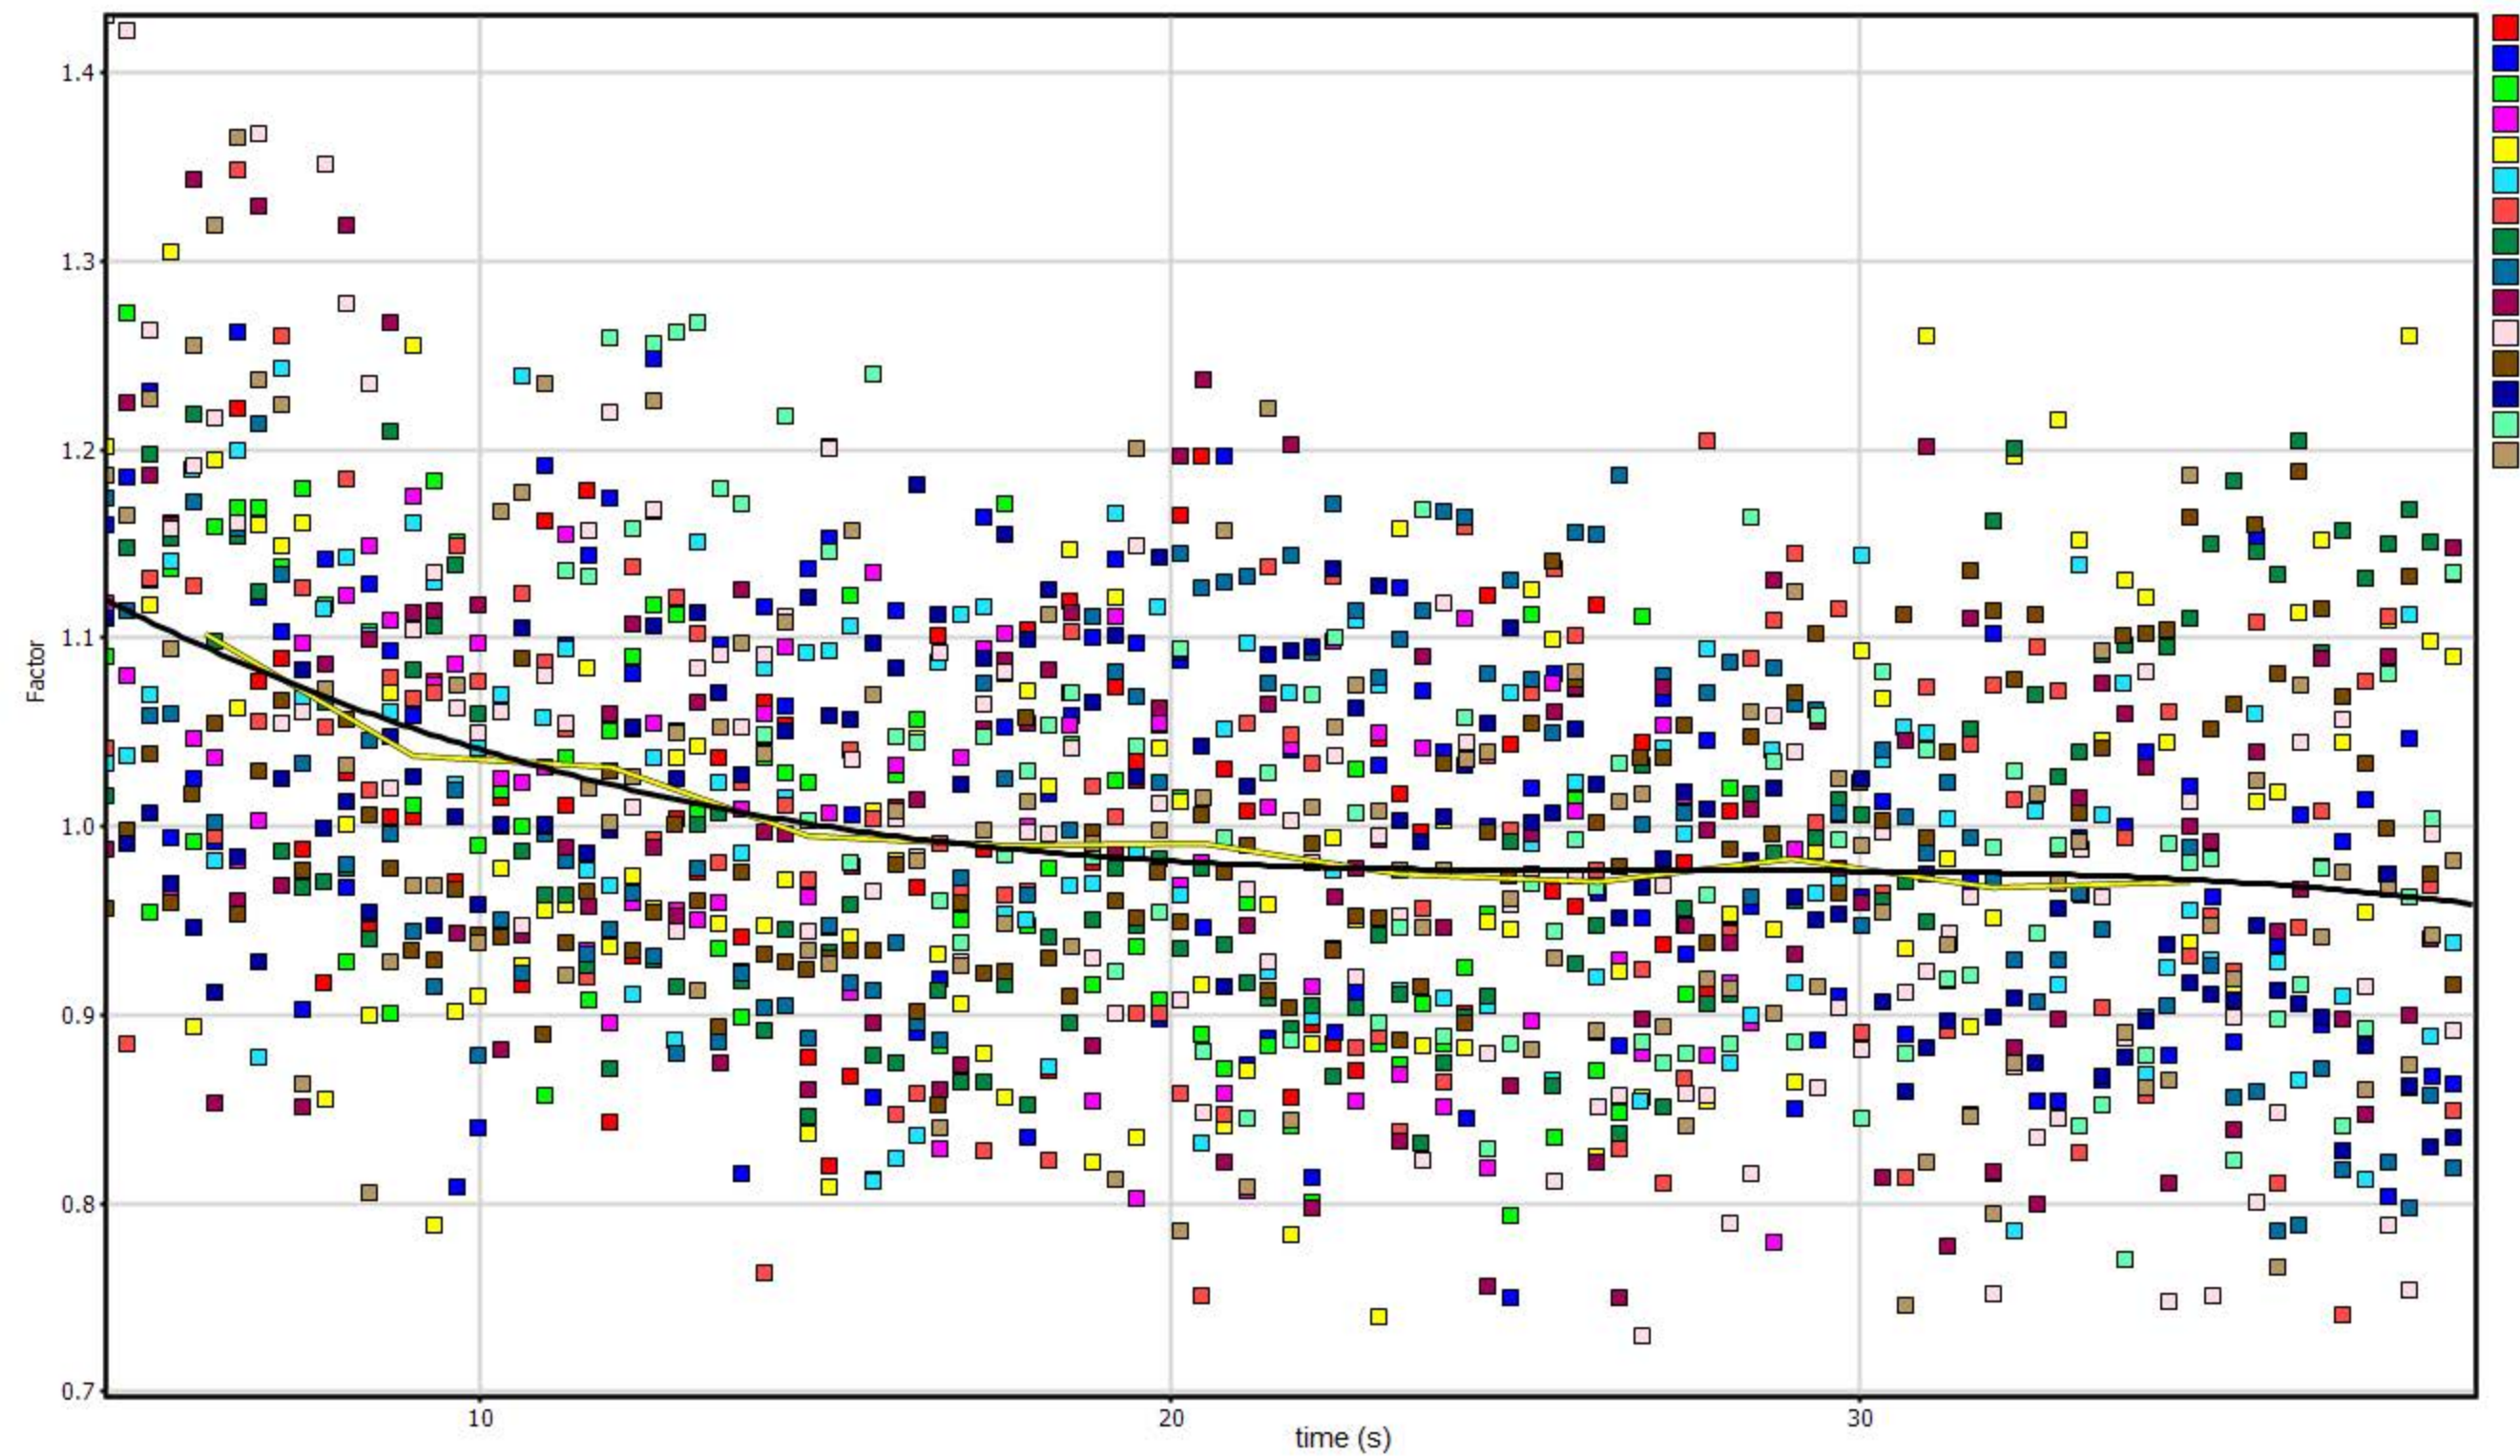

### Downhole Rb/Sr ratio for Taratap biotite

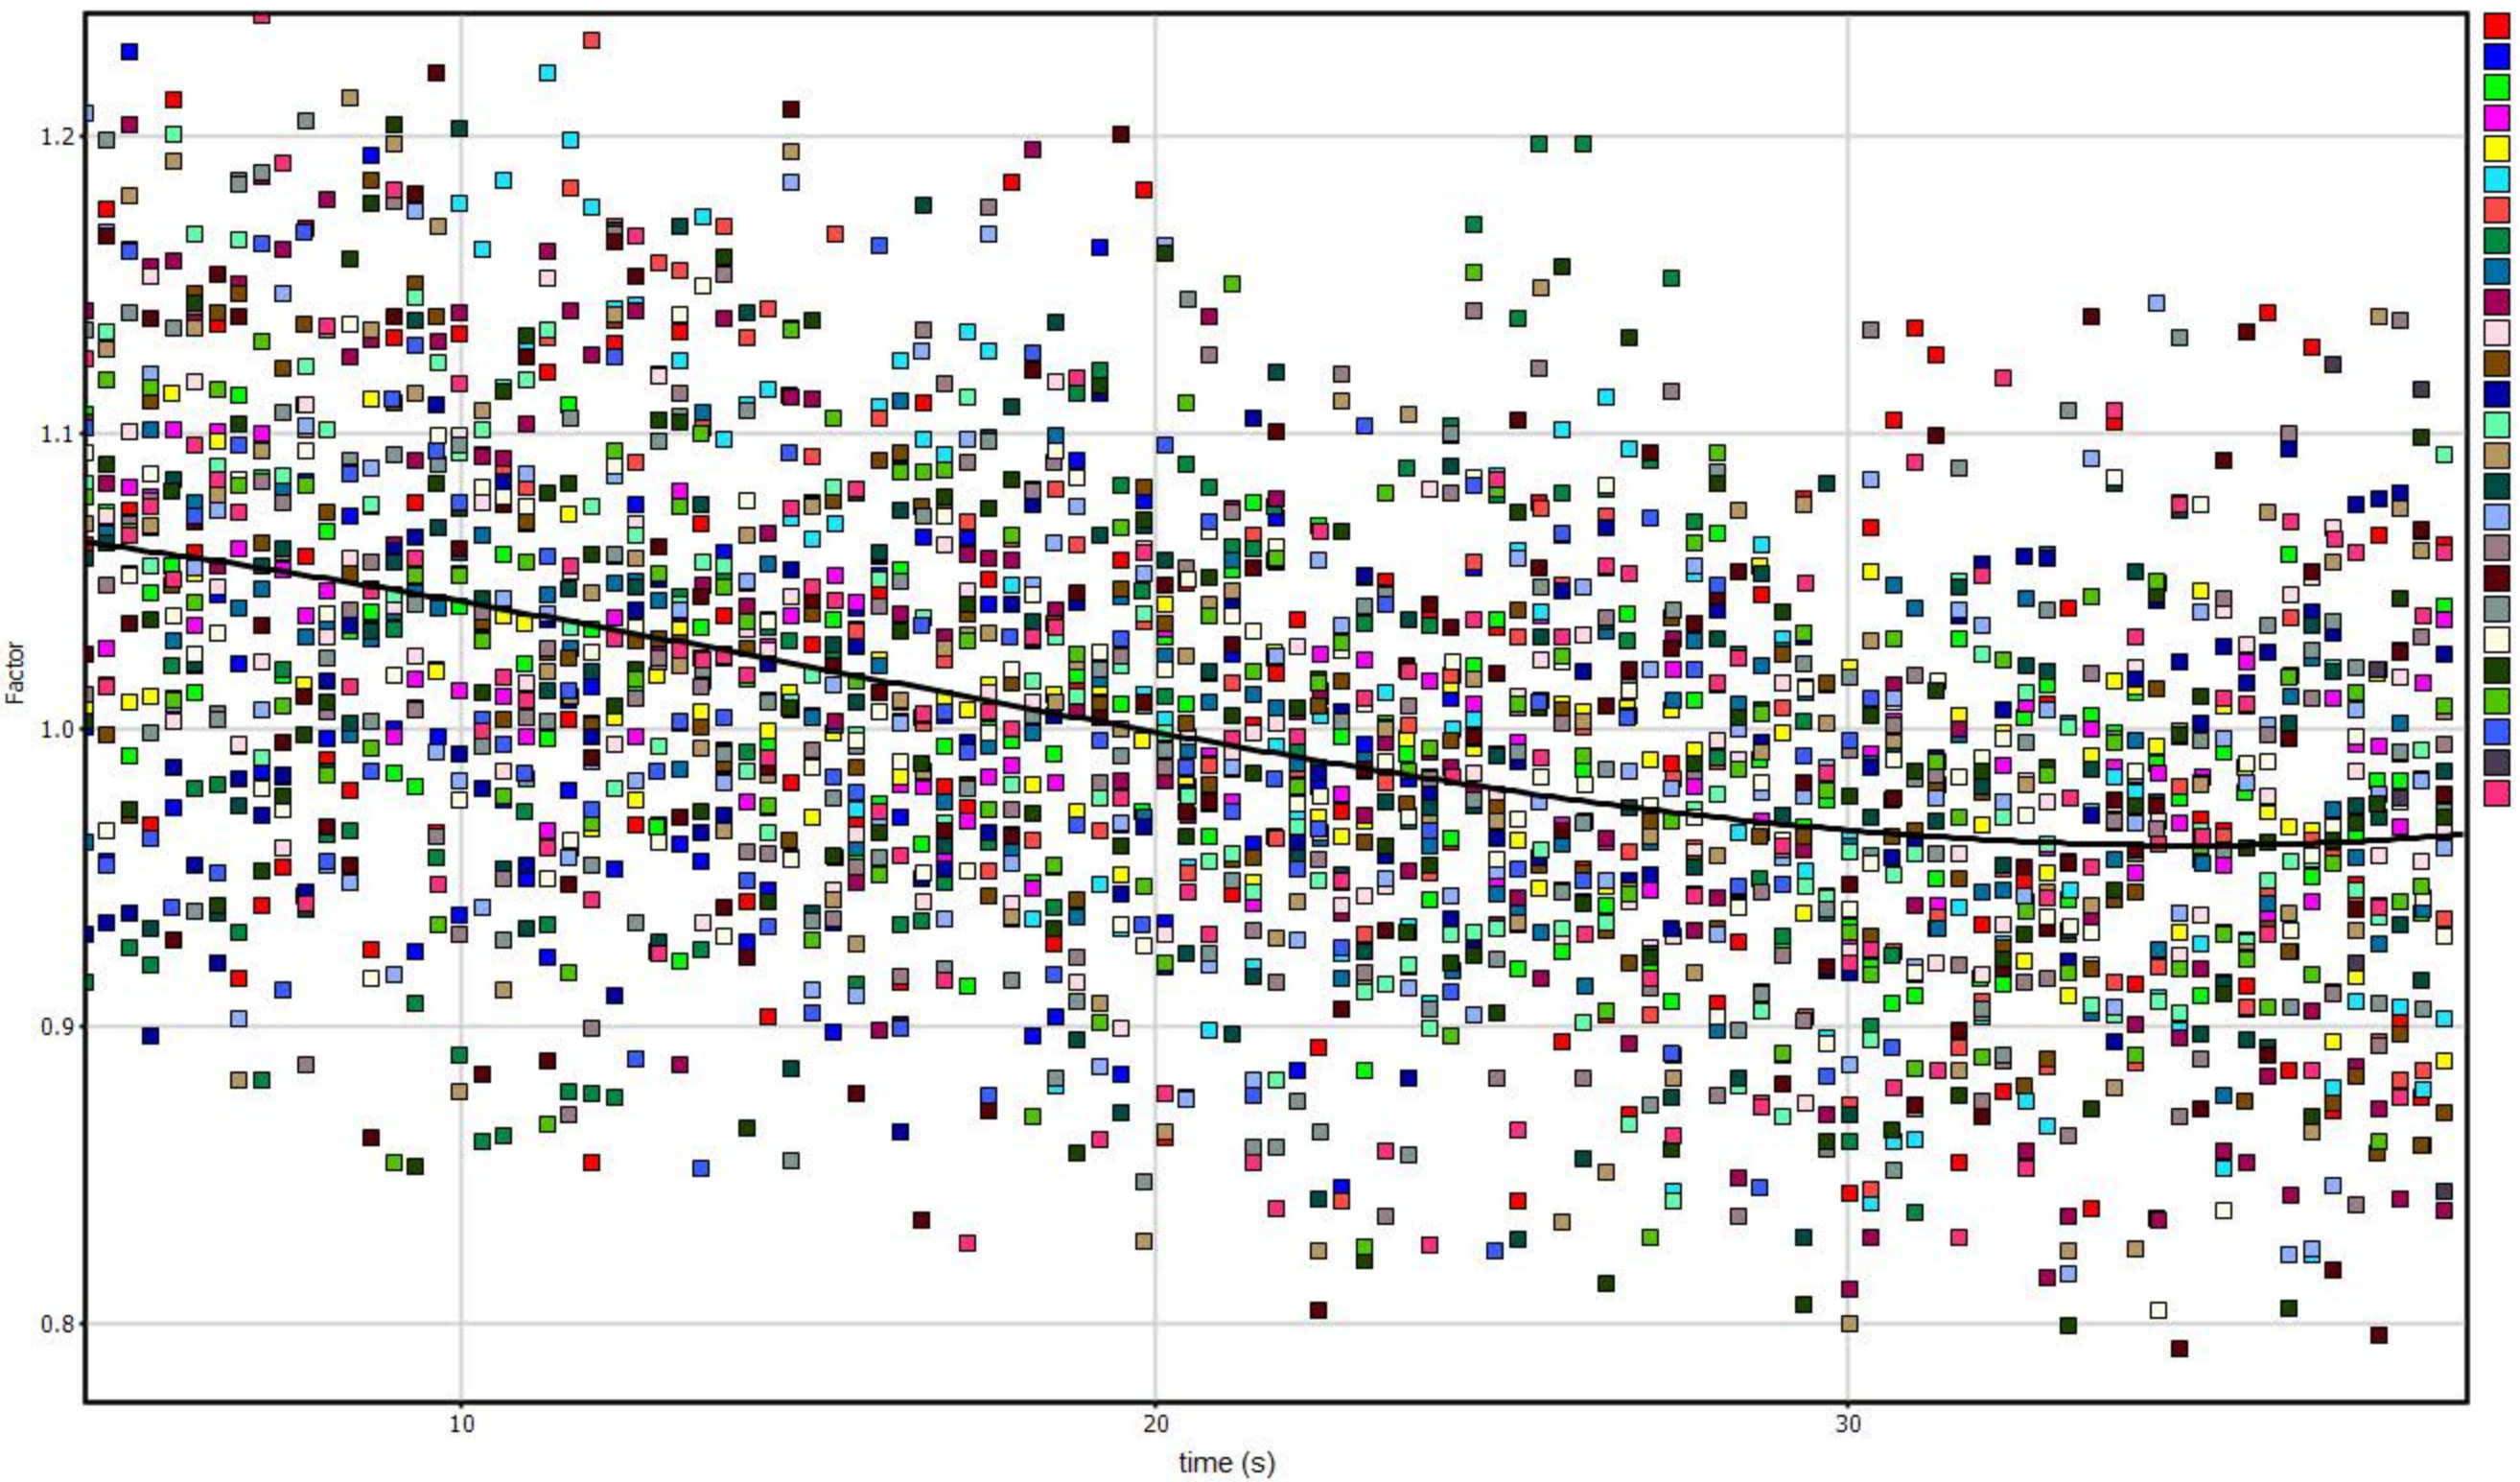

Downhole Rb/Sr ratio for Bund1b K-feldspar

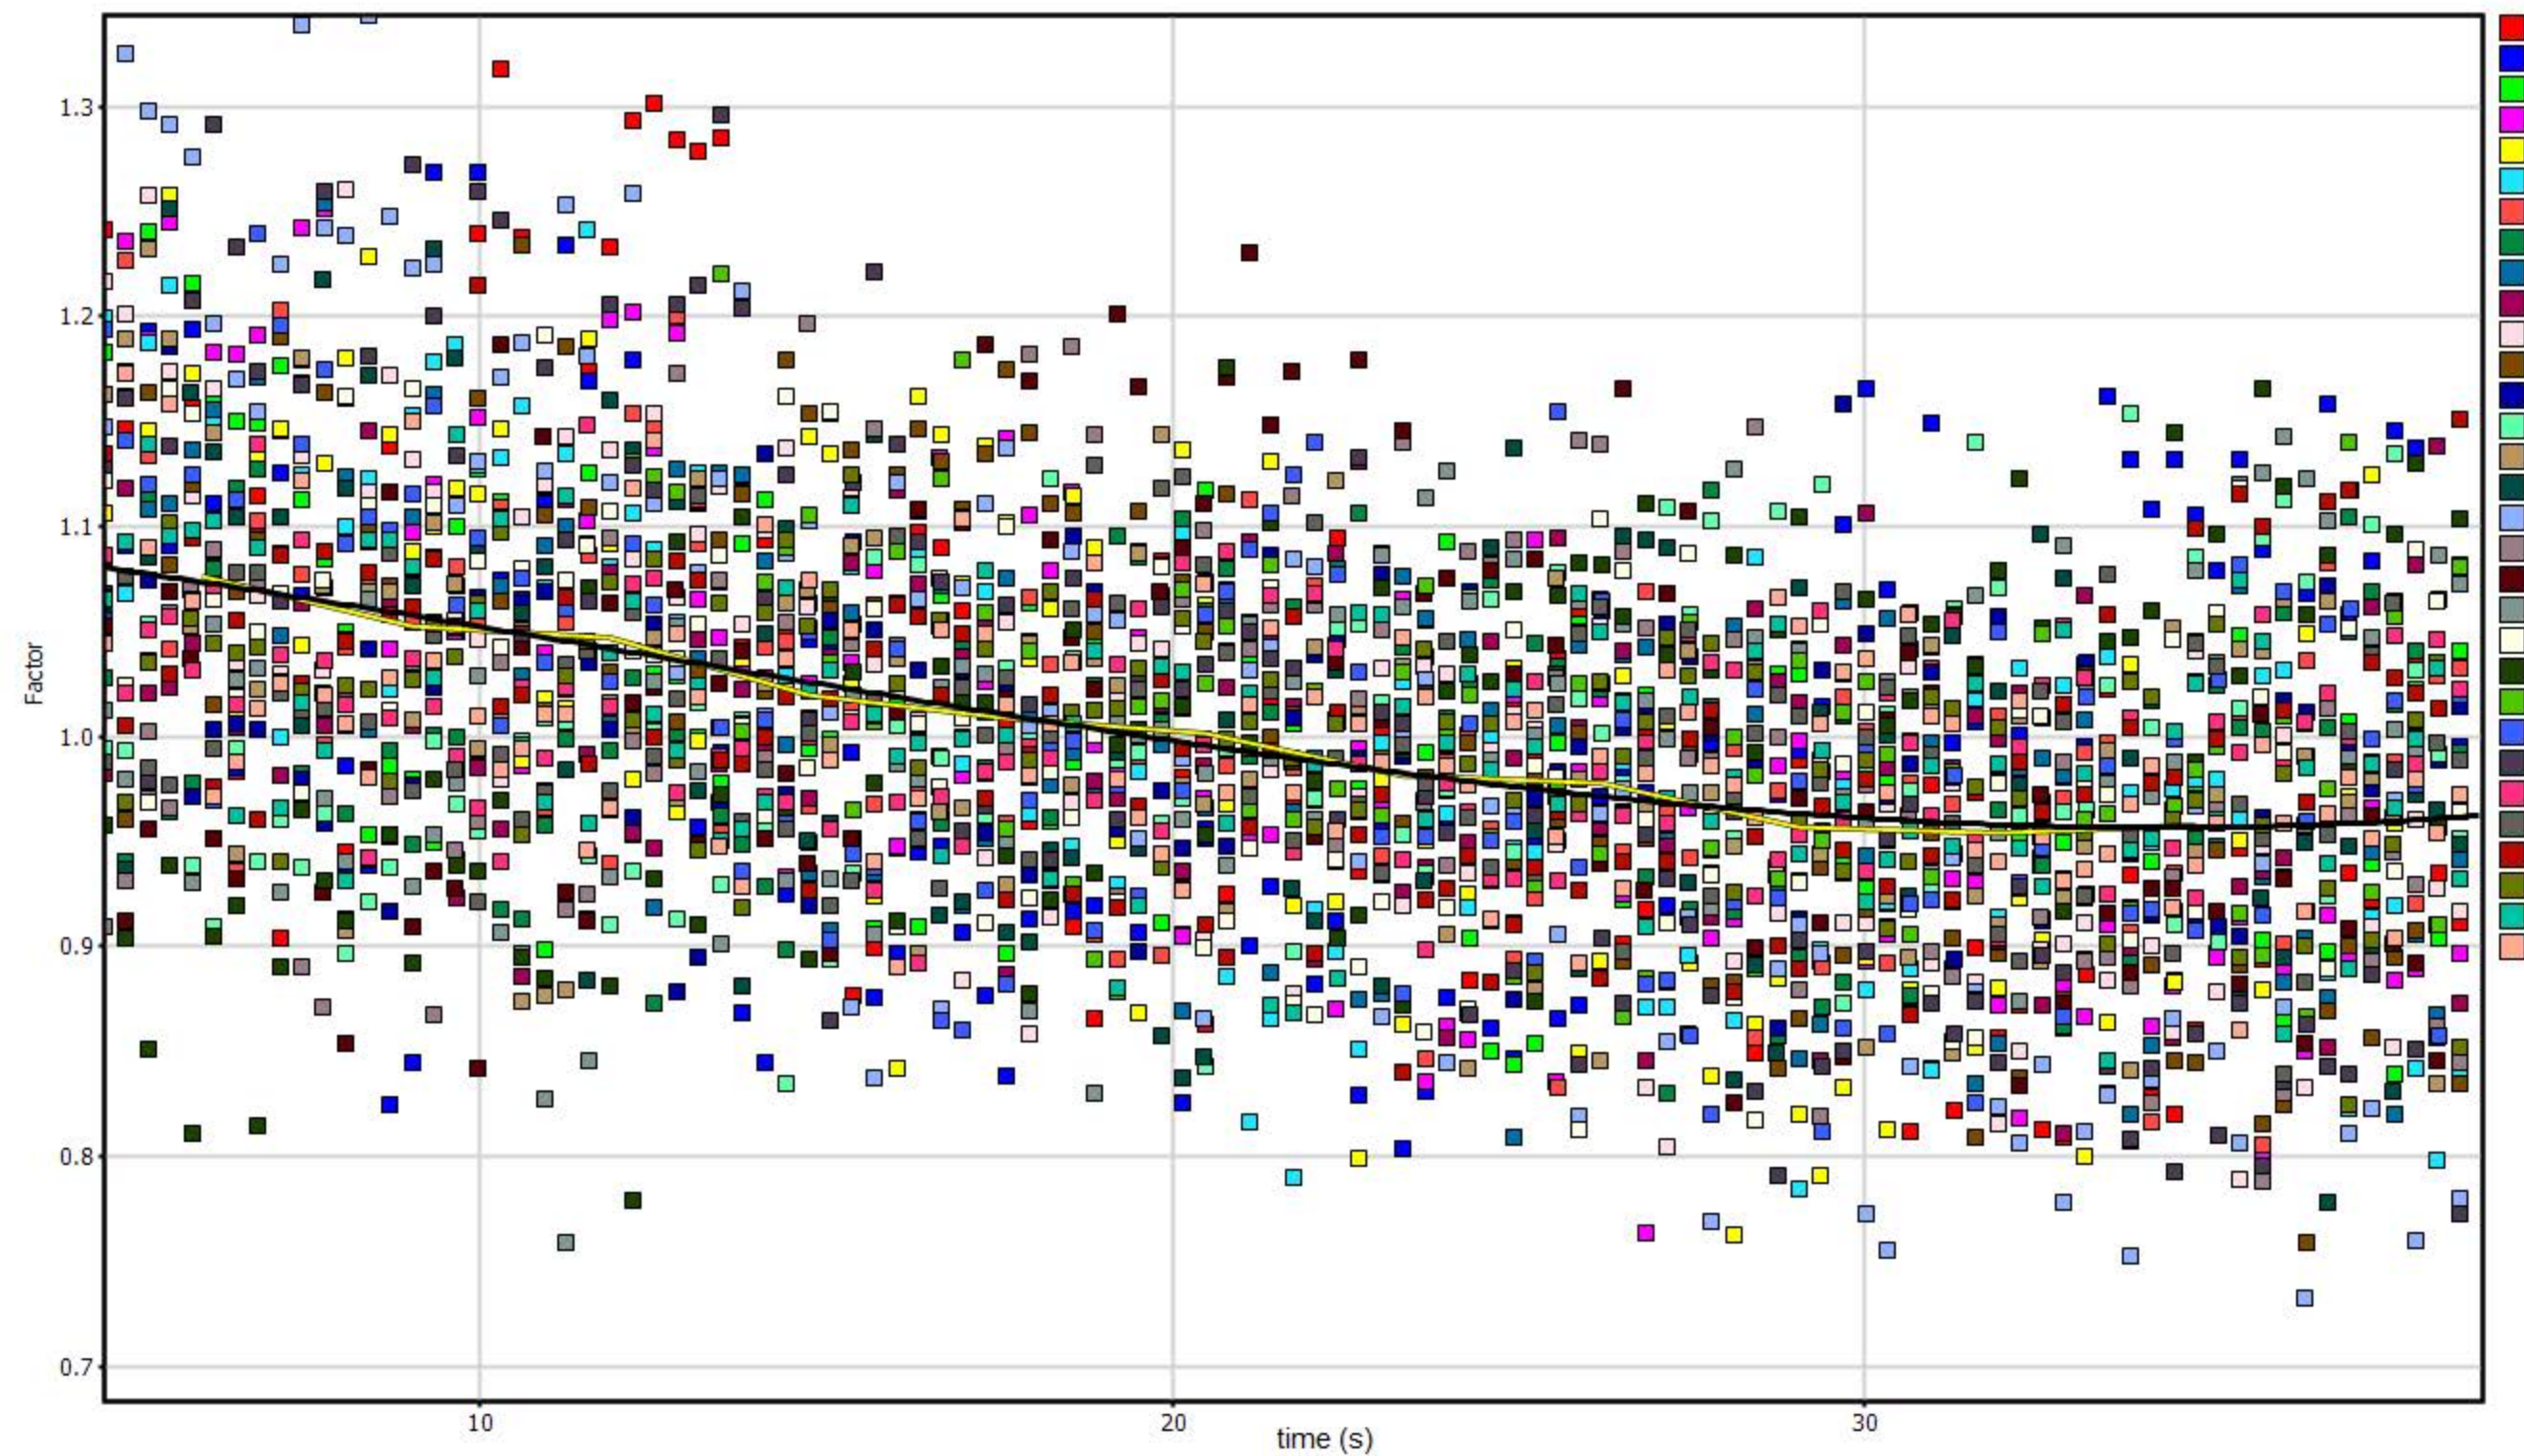

Downhole Rb/Sr ratio for Bund6a K-feldspar

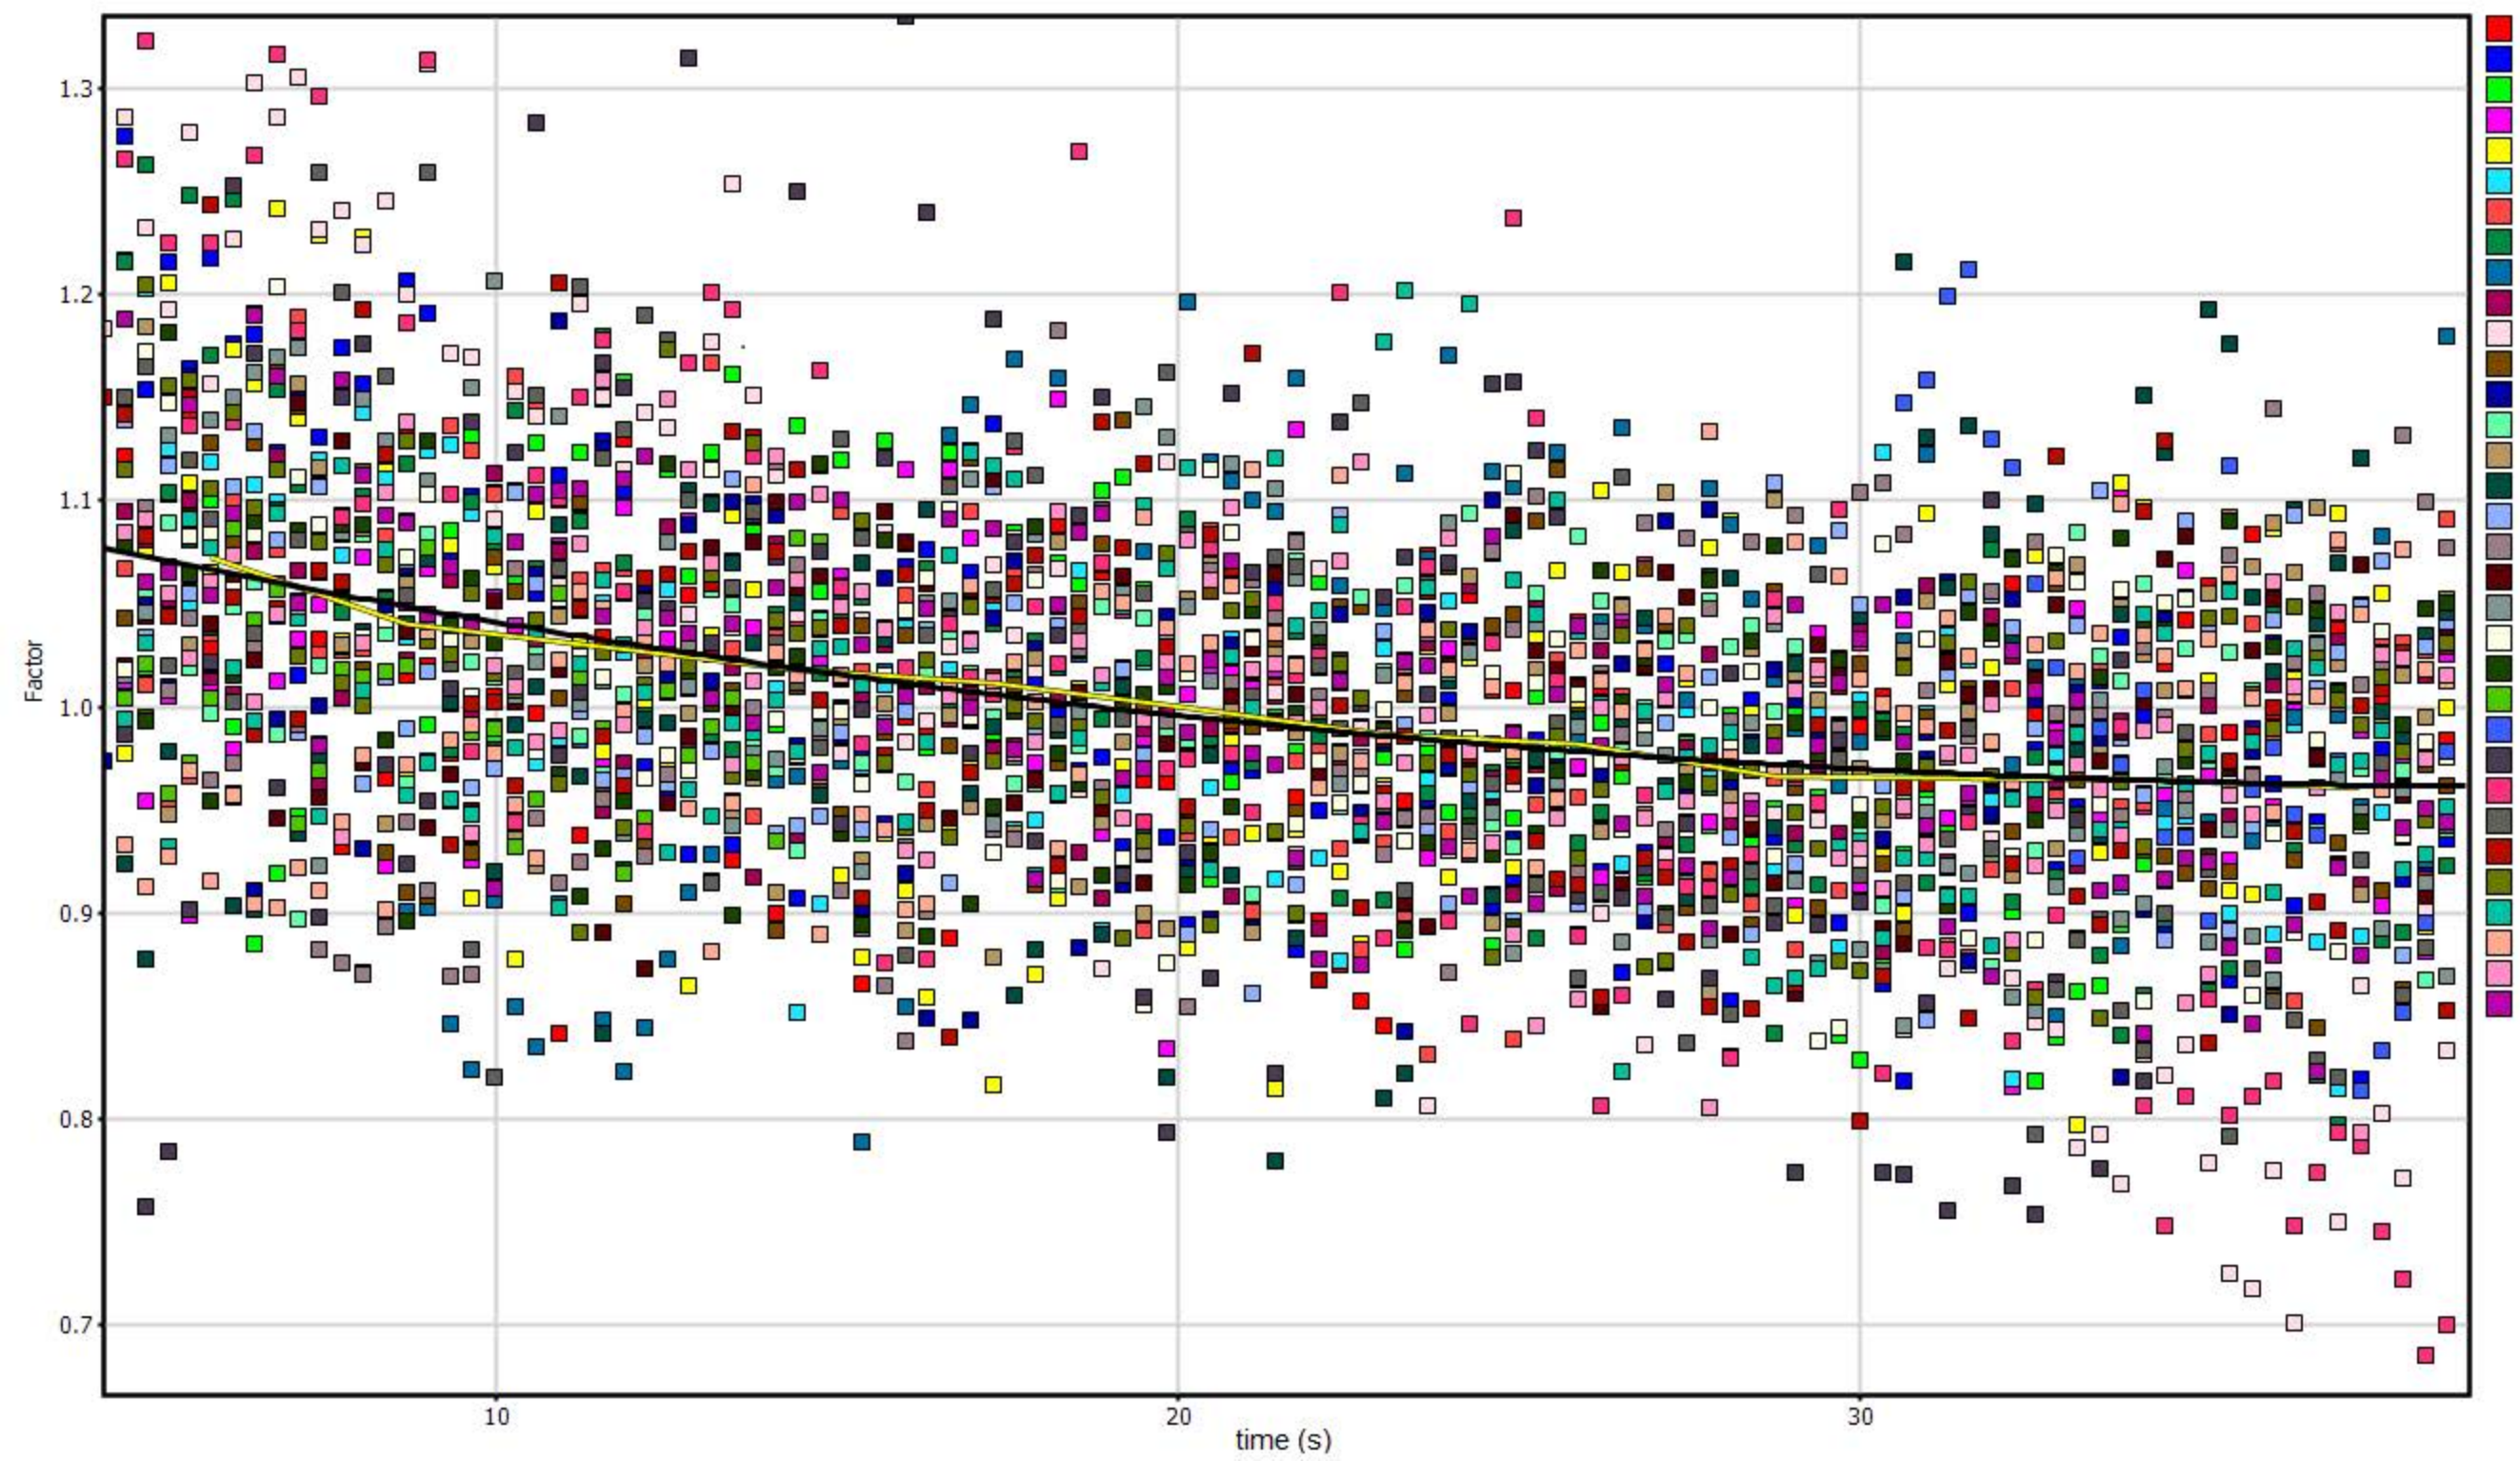

# Downhole Rb/Sr ratio for Taratap K-feldspar

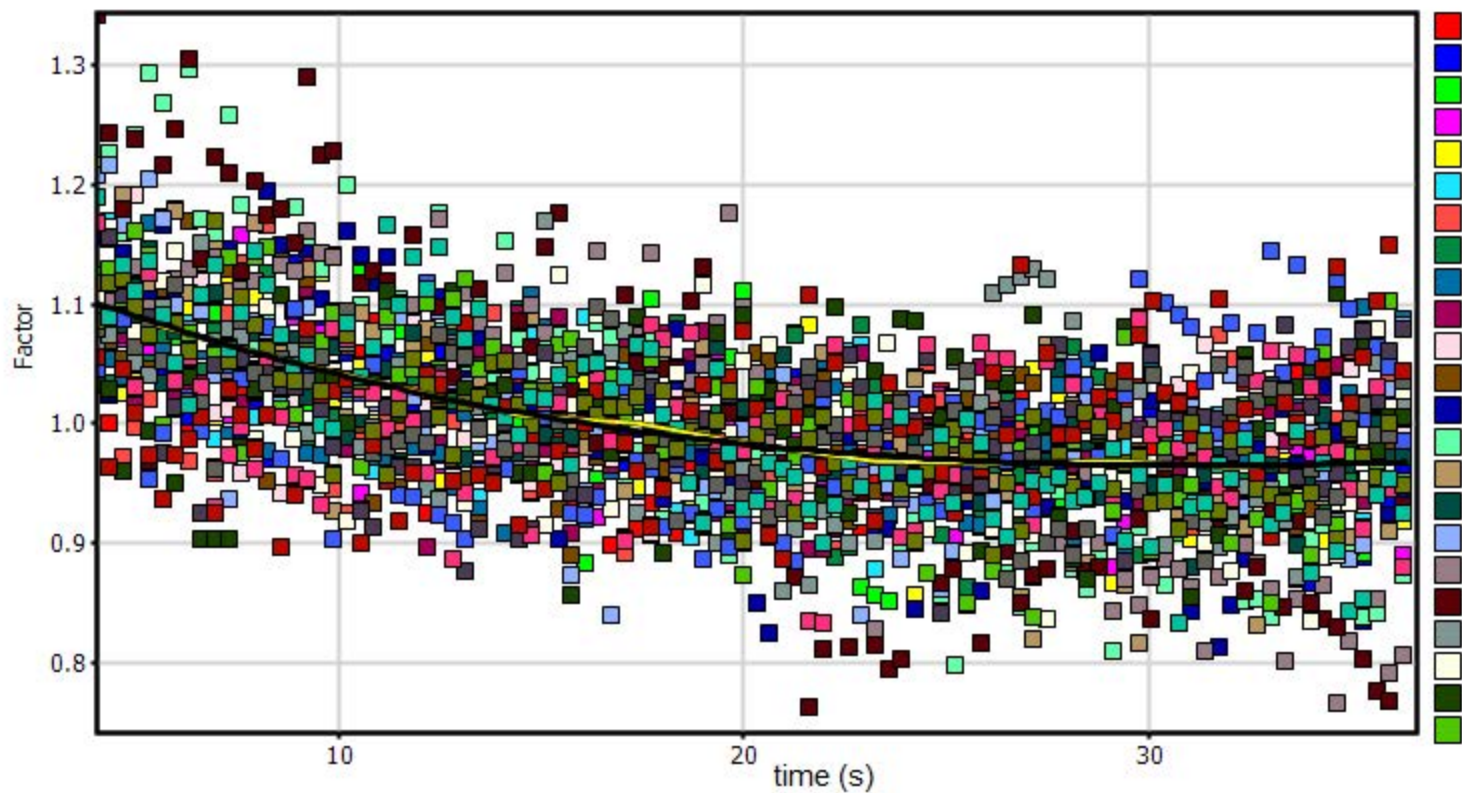

Supplement: Supplementary file 4 [file gchron-6-21-2024-supplement.zip]
