# Supplementary material for: Calibration methods for laser ablation Rb–Sr geochronology: comparisons and recommendation based on NIST glass and natural reference materials
Source: Copernicus journal article supplement (doi:10.5194/gchron-6-21-2024), 2024-01-17
Supplement: Supplementary file 14 [file gchron-6-21-2024-supplement.zip]

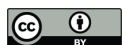

## *Supplement of*

# **Calibration methods for laser ablation Rb–Sr geochronology: comparisons and recommendation based on NIST glass and natural reference materials**

**Stijn Glorie et al.**

*Correspondence to:* Stijn Glorie ([stijn.glorie@adelaide.edu.au](mailto:stijn.glorie@adelaide.edu.au))

- [gchron-6-21-2024-supplement-title-page.pdf](#)
- [Supplementary File S1.pdf](#)
- [Supplementary File S2.pdf](#)
- [Supplementary File S3\\_rev.png](#)
- [Supplementary File S4\\_rev.pdf](#)
- [Supplementary File S5\\_rev.zip](#)

The copyright of individual parts of the supplement might differ from the article licence.
