# Supplementary material for: Calibration methods for laser ablation Rb–Sr geochronology: comparisons and recommendation based on NIST glass and natural reference materials
Source: Copernicus journal article supplement (doi:10.5194/gchron-6-21-2024), 2024-01-17
Supplement: Supplementary file 35 [file gchron-6-21-2024-supplement.zip]

Archive with 6 entries (6 files):
- Supplementary File S5_rev.zip
- Supplementary File S4_rev.pdf
- Supplementary File S1.pdf
- gchron-6-21-2024-supplement-title-page.pdf
- Supplementary File S3_rev.png
- Supplementary File S2.pdf
