# Supplementary figures and images for: Calibration methods for laser ablation Rb–Sr geochronology: comparisons and recommendation based on NIST glass and natural reference materials
Source: Copernicus journal article supplement (doi:10.5194/gchron-6-21-2024), 2024-01-17

age =  $328.76 \pm 3.95$  Ma (n=25)  
 $(^{86}\text{Sr}/^{87}\text{Sr})_0 = 1.37393 \pm 0.00044$   
MSWD = 0.25,  $p(\chi^2) = 1$

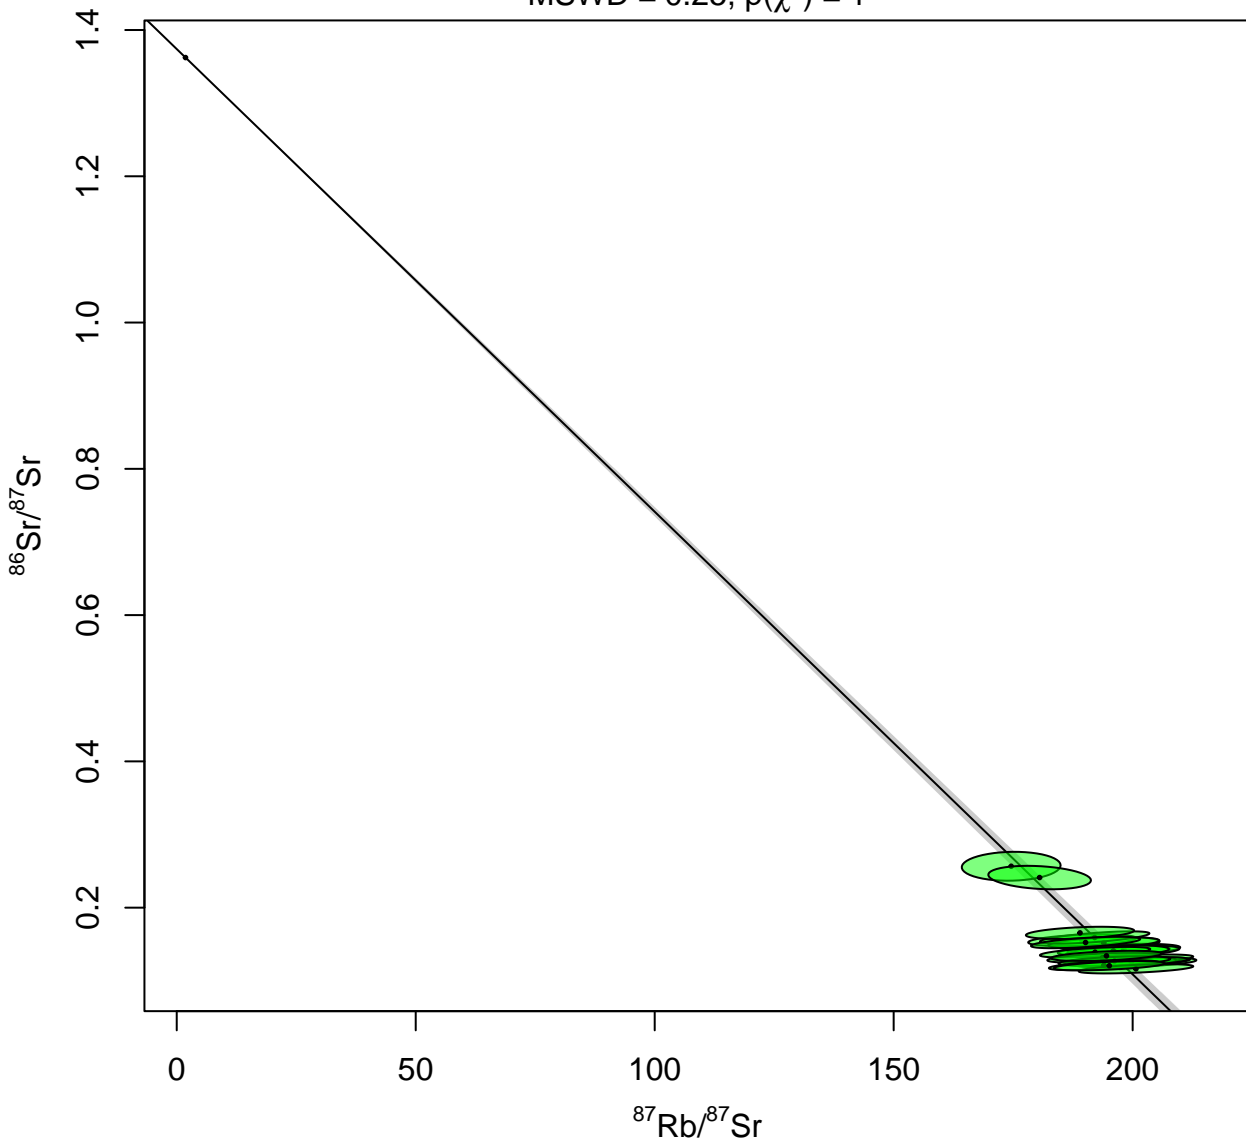

Supplement: Supplementary file 1 [file gchron-6-21-2024-supplement.zip]

age =  $283.9 \pm 14.1$  Ma (n=57)  
 $(^{86}\text{Sr}/^{87}\text{Sr})_0 = 1.4147 \pm 0.0043$   
MSWD = 0.84,  $p(\chi^2) = 0.79$

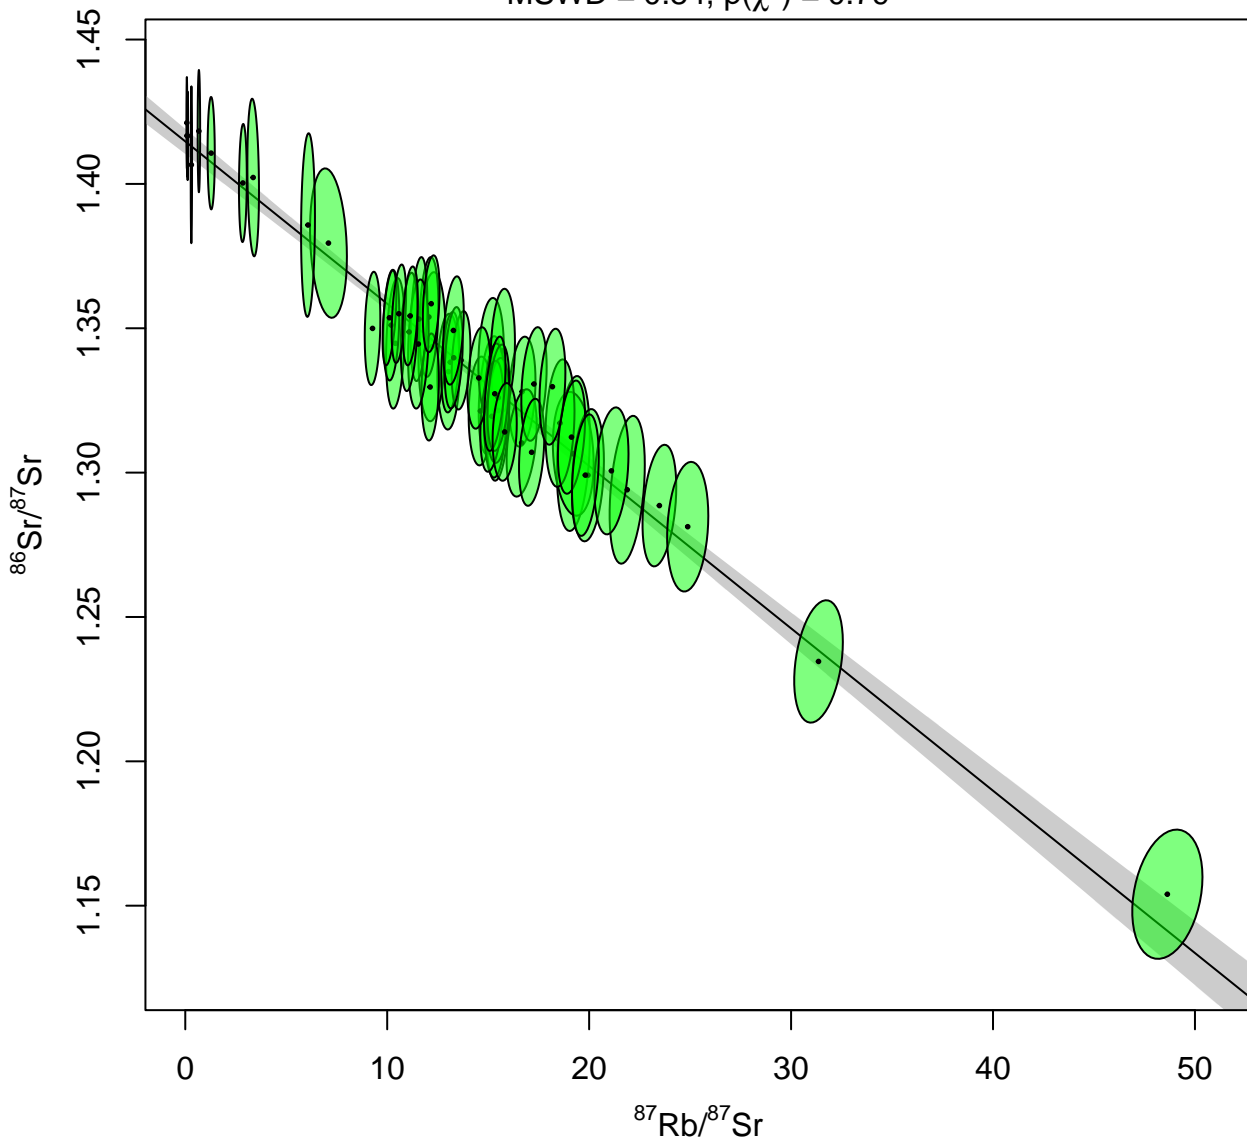

Supplement: Supplementary file 2 [file gchron-6-21-2024-supplement.zip]

age =  $283.4 \pm 37.8$  Ma (n=53)  
 $(^{86}\text{Sr}/^{87}\text{Sr})_0 = 1.411 \pm 0.010$   
MSWD = 0.19,  $p(\chi^2) = 1$

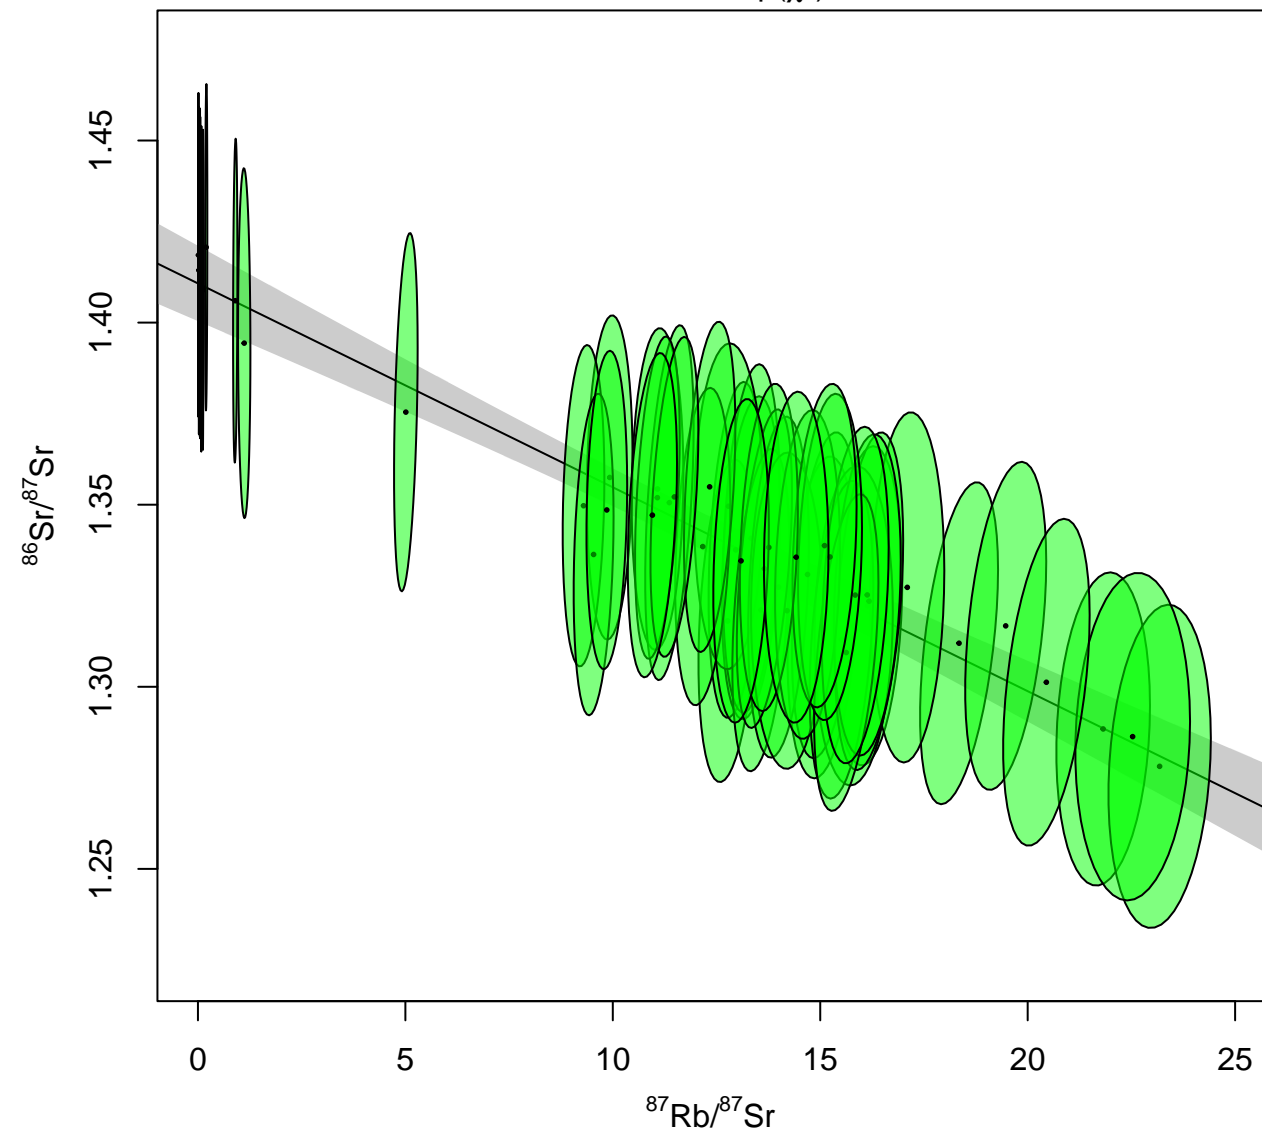

Supplement: Supplementary file 3 [file gchron-6-21-2024-supplement.zip]

age =  $288.75 \pm 3.99$  Ma (n=22)

$(^{86}\text{Sr}/^{87}\text{Sr})_0 = 1.413 \pm 0.011$

MSWD = 0.34,  $p(\chi^2) = 1$

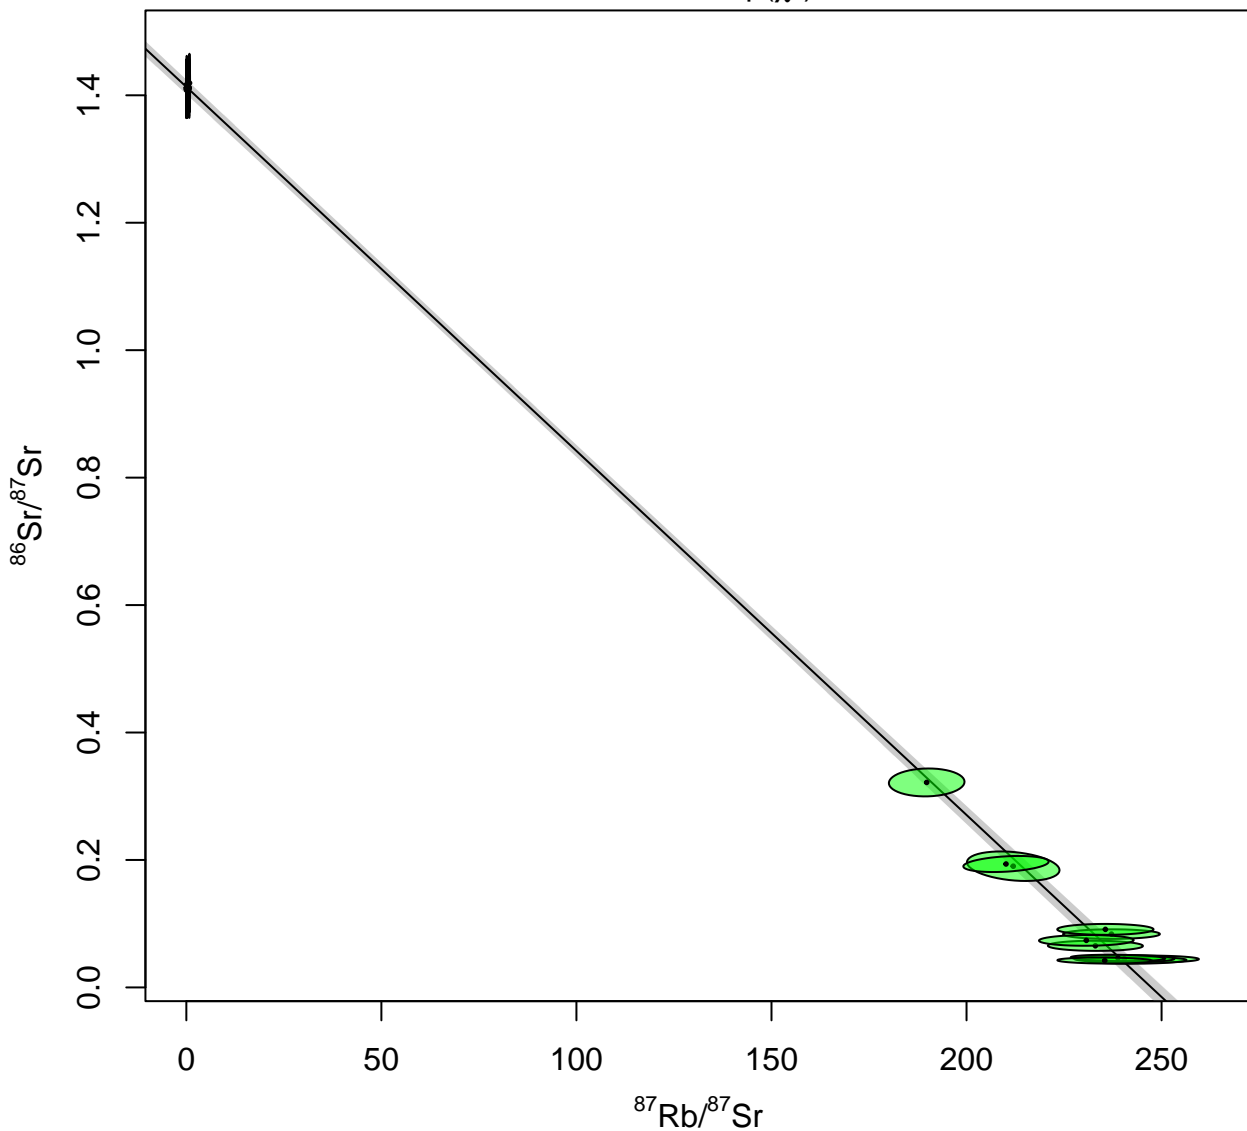

Supplement: Supplementary file 5 [file gchron-6-21-2024-supplement.zip]

age =  $284.74 \pm 3.00$  Ma (n=22)  
 $(^{86}\text{Sr}/^{87}\text{Sr})_0 = 1.4166 \pm 0.0036$   
MSWD = 1.1,  $p(\chi^2) = 0.37$

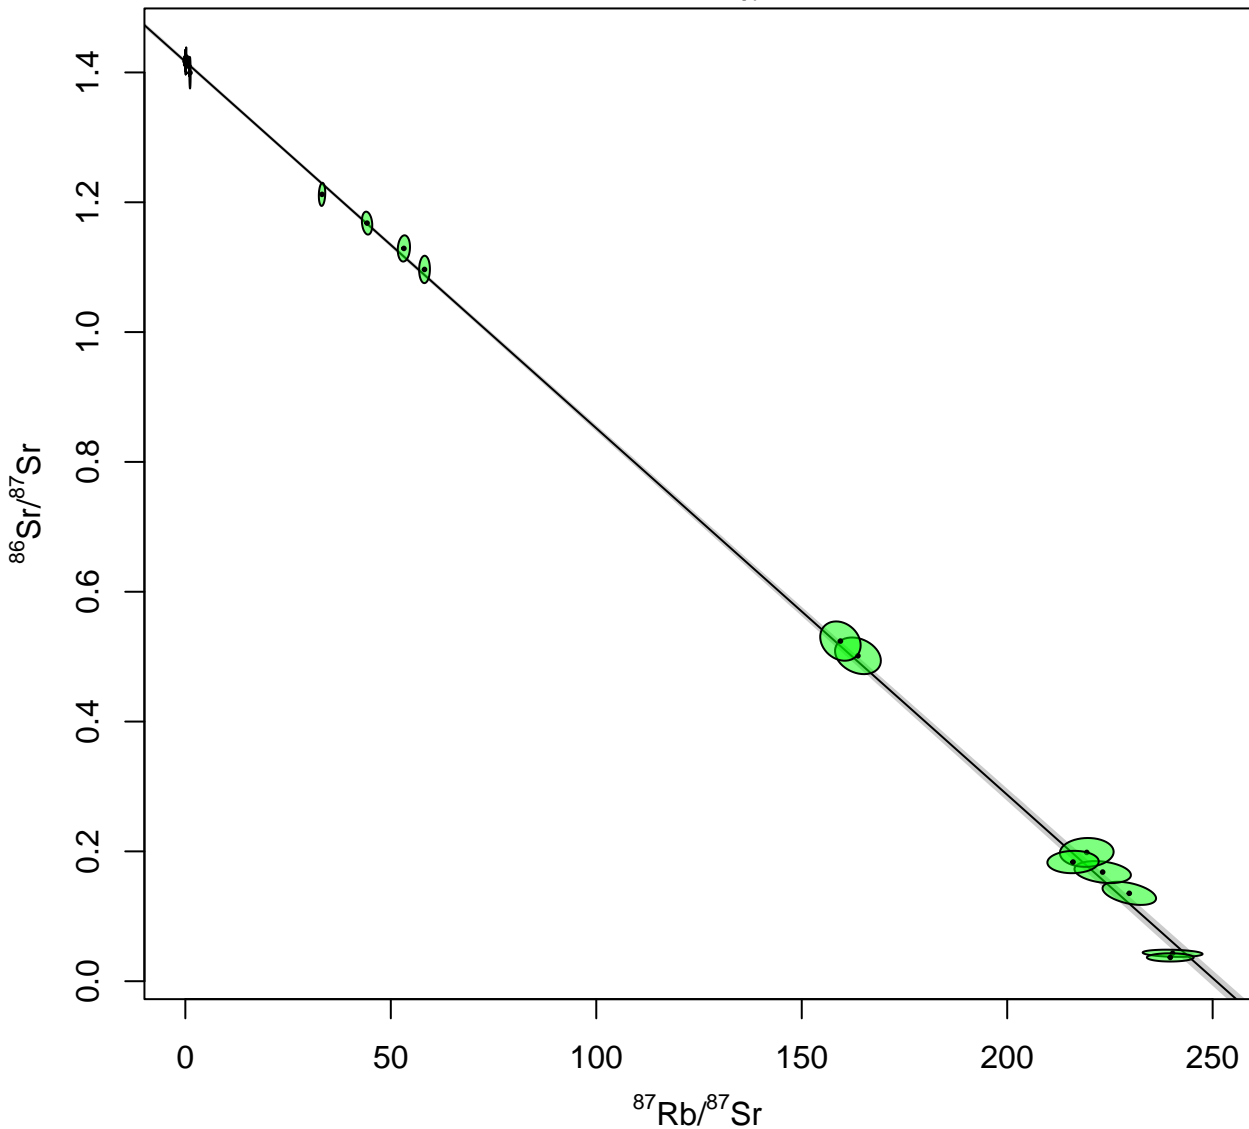

Supplement: Supplementary file 6 [file gchron-6-21-2024-supplement.zip]

age =  $311.58 \pm 2.70$  | 3.75 Ma (n=21)  
 $(^{86}\text{Sr}/^{87}\text{Sr})_0 = 1.37331 \pm 0.00042$  | 0.00071  
MSWD = 2.5,  $p(\chi^2) = 0.00034$

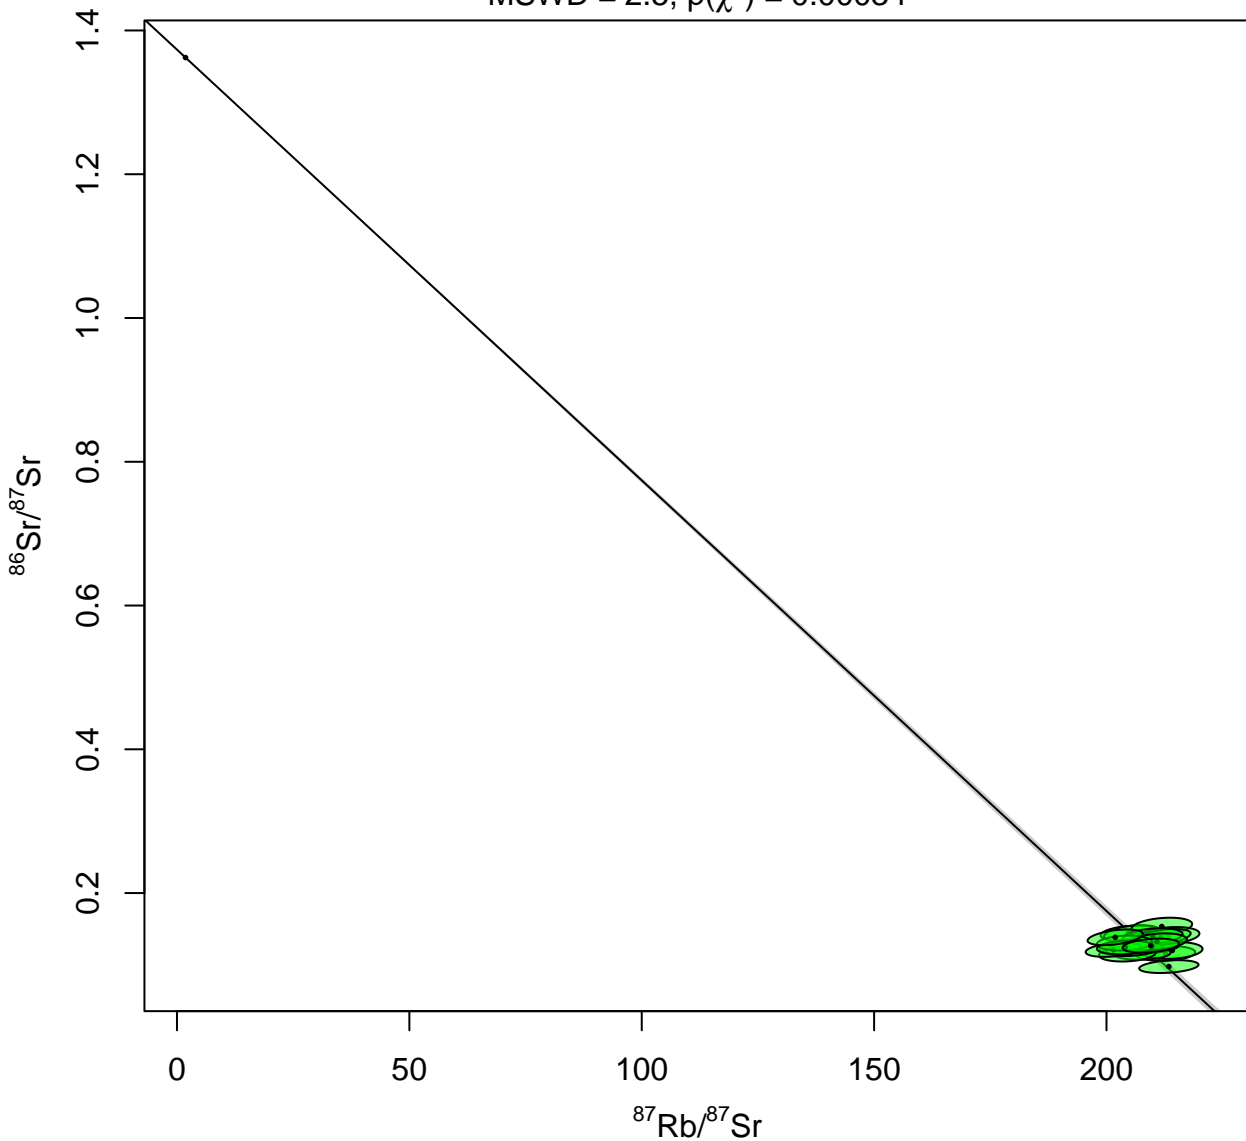

Supplement: Supplementary file 7 [file gchron-6-21-2024-supplement.zip]

age =  $288.21 \pm 4.45$  Ma (n=22)  
 $(^{86}\text{Sr}/^{87}\text{Sr})_0 = 1.4169 \pm 0.0037$   
MSWD = 0.7,  $p(\chi^2) = 0.83$

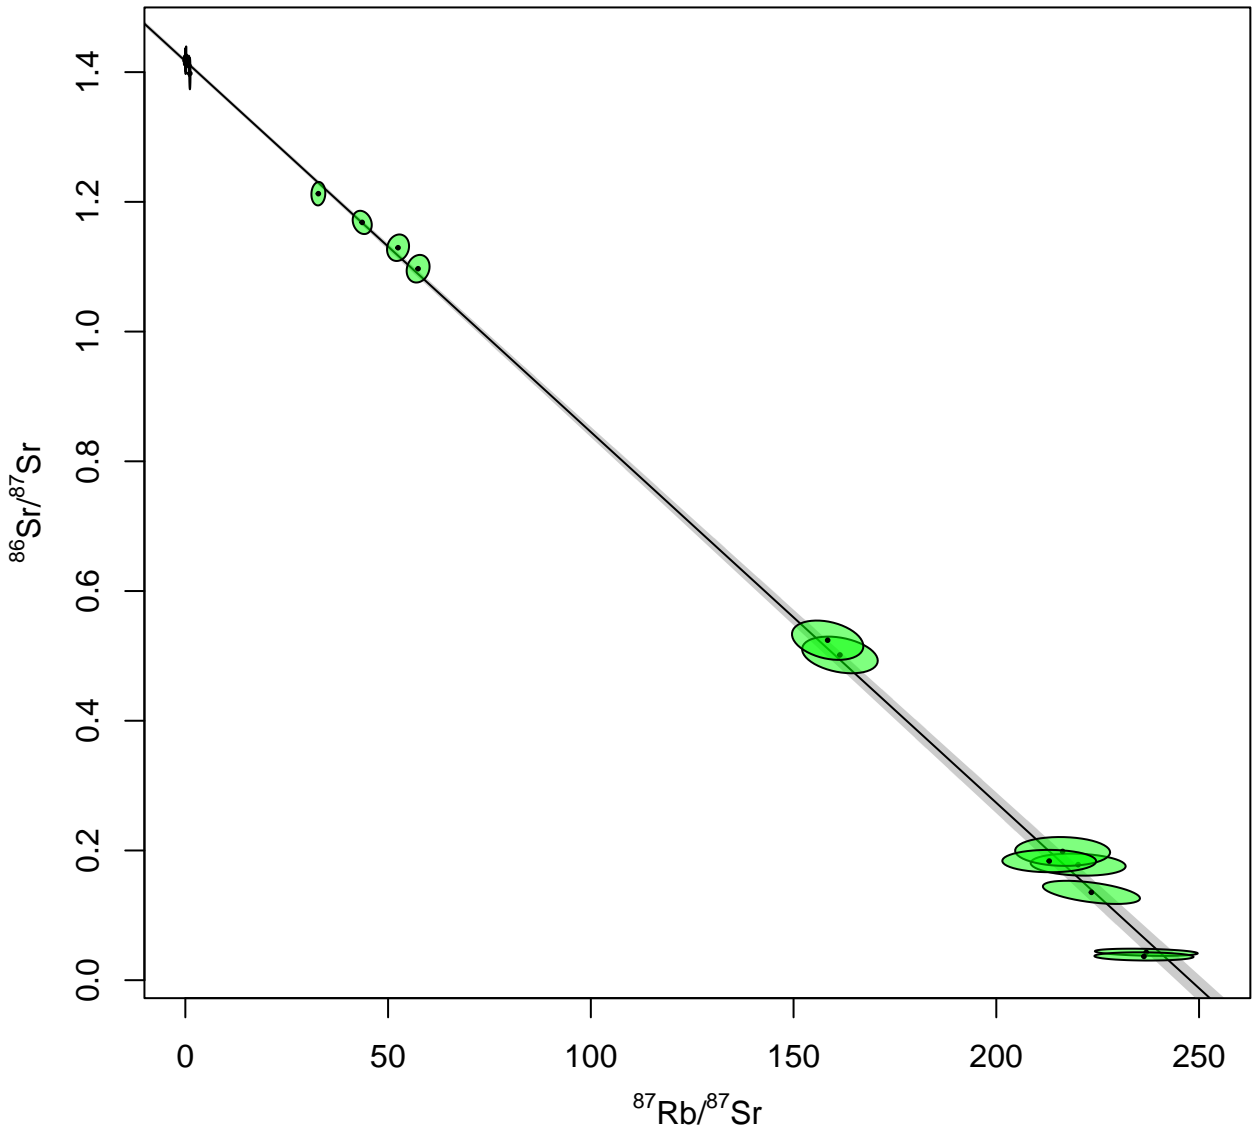

Supplement: Supplementary file 8 [file gchron-6-21-2024-supplement.zip]

MSWD = 0.74,  $p(\chi^2) = 0.78$

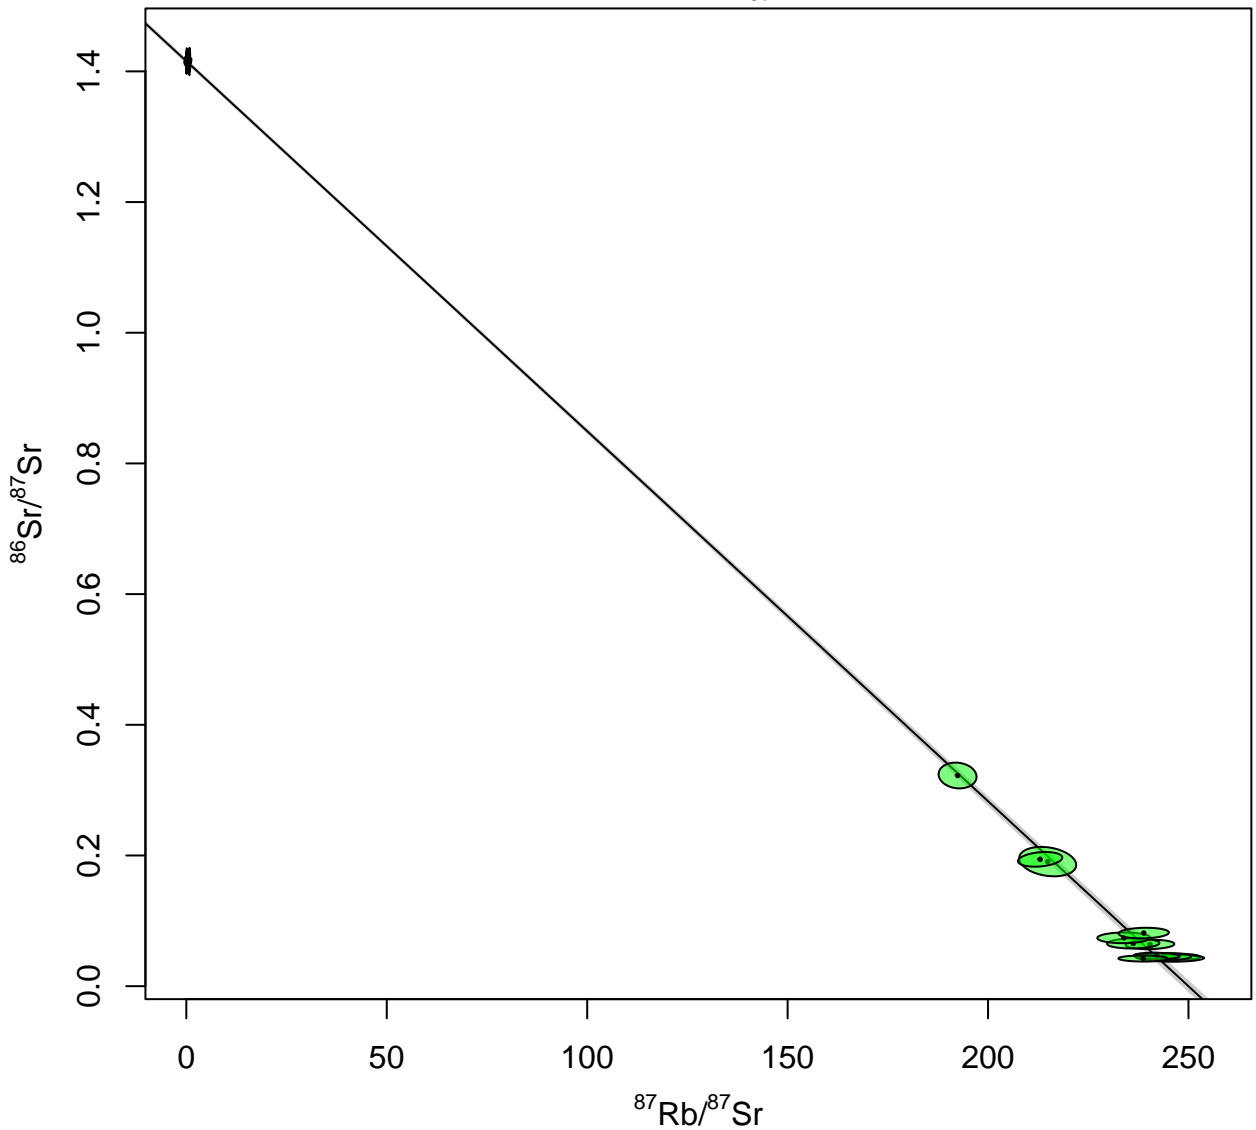

Supplement: Supplementary file 9 [file gchron-6-21-2024-supplement.zip]

age =  $280.91 \pm 2.04$  | 2.24 Ma (n=38)

$(^{86}\text{Sr}/^{87}\text{Sr})_0 = 1.412 \pm 0.010$  | 0.013

MSWD = 1.5,  $p(\chi^2) = 0.028$

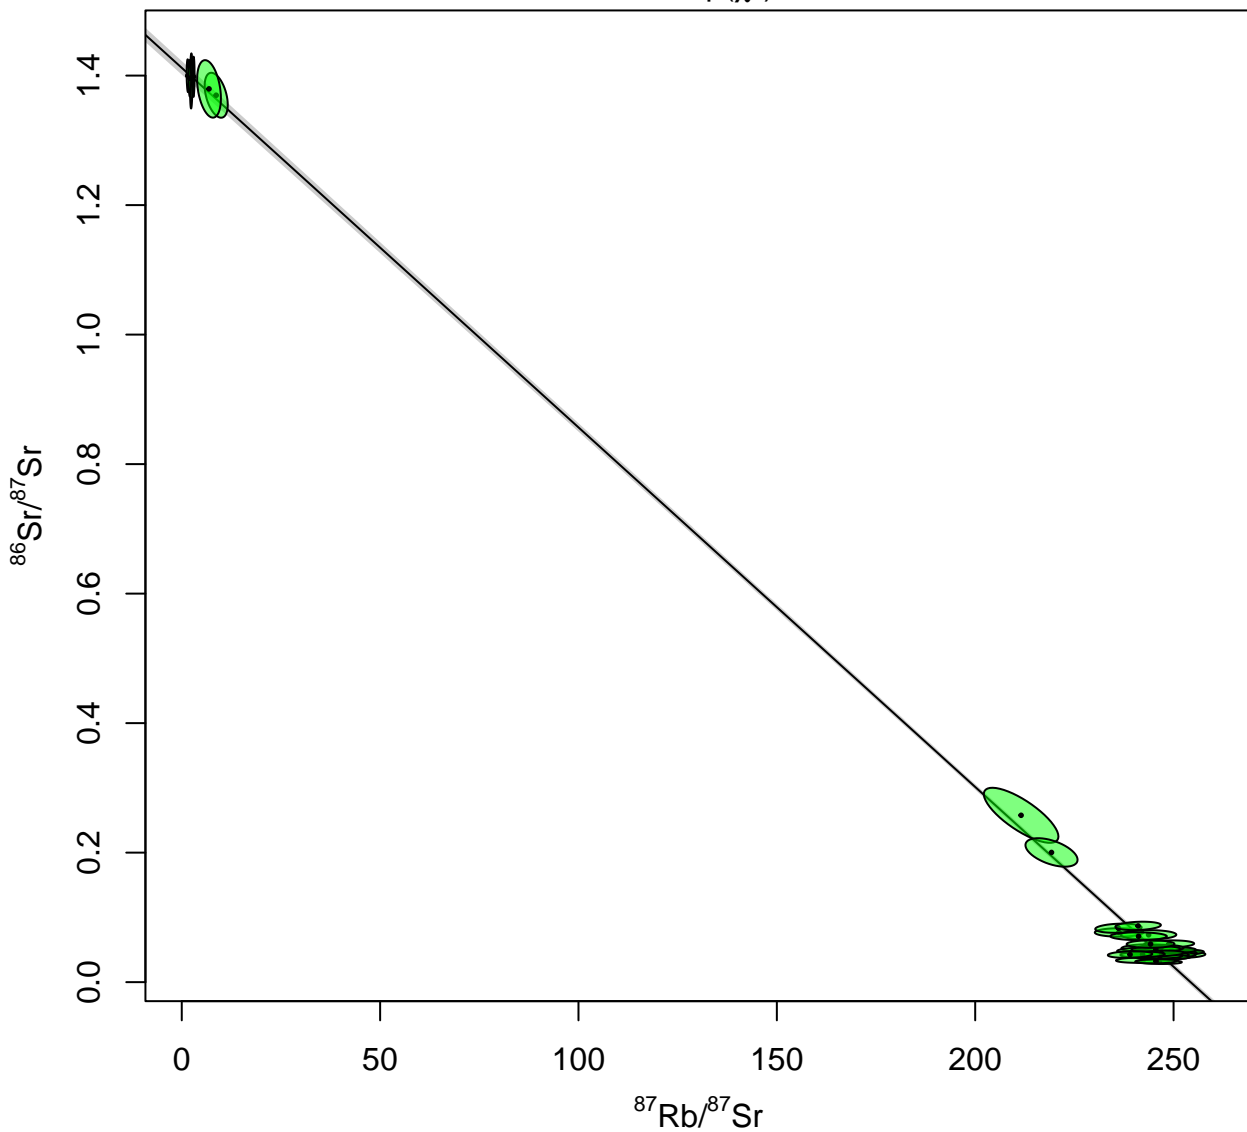

Supplement: Supplementary file 10 [file gchron-6-21-2024-supplement.zip]

age =  $280.1 \pm 22.8$  Ma (n=57)  
 $(^{86}\text{Sr}/^{87}\text{Sr})_0 = 1.4114 \pm 0.0076$   
MSWD = 0.3,  $p(\chi^2) = 1$

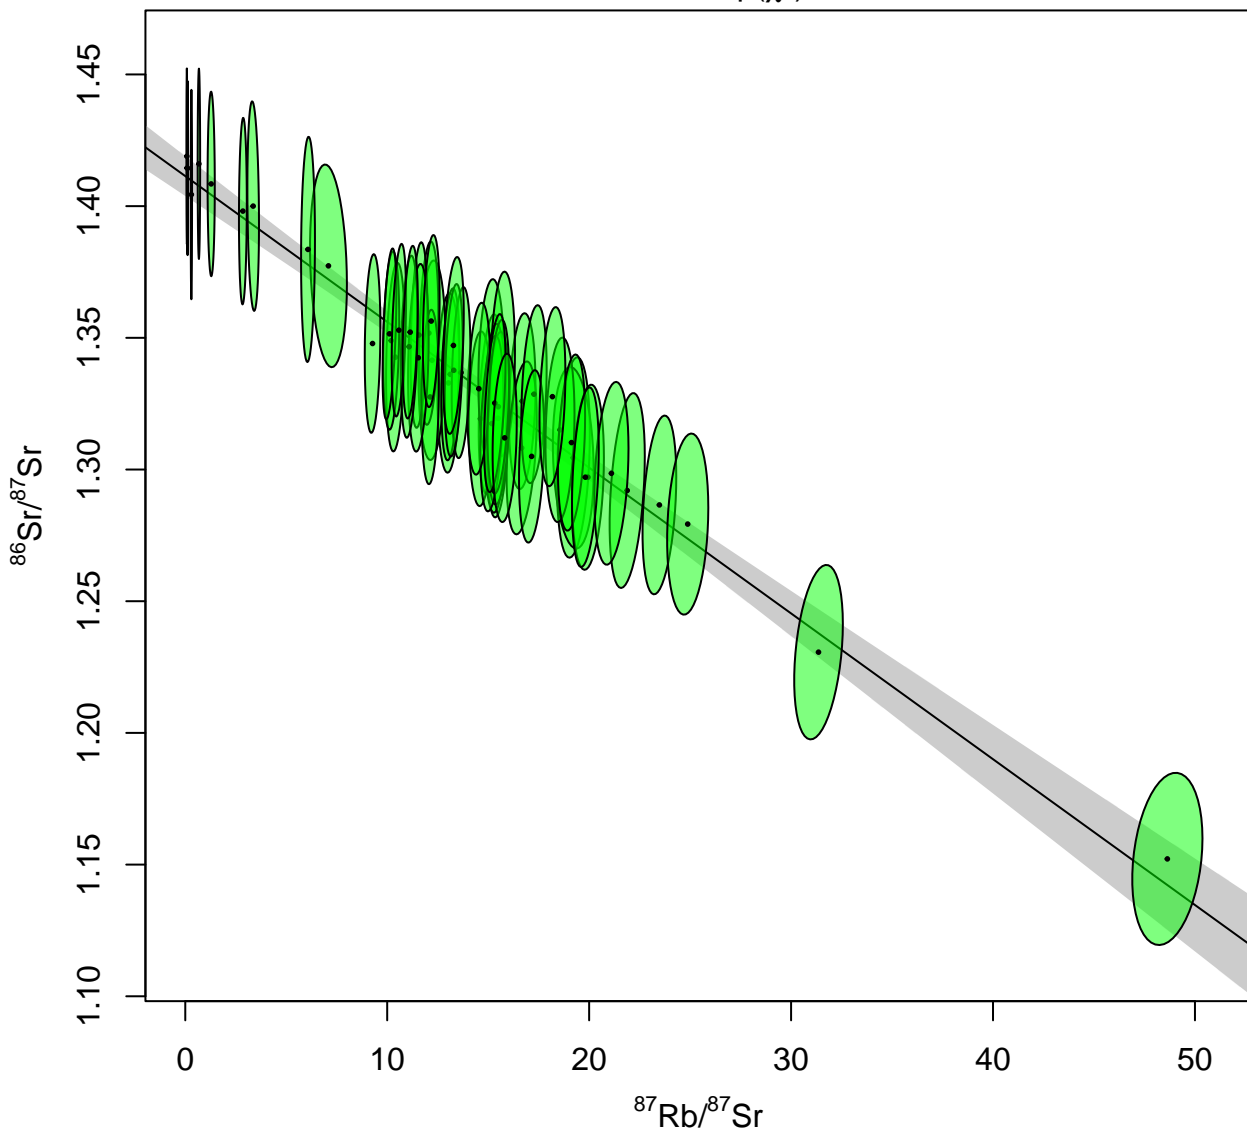

Supplement: Supplementary file 11 [file gchron-6-21-2024-supplement.zip]

age =  $279.47 \pm 2.31$  Ma (n=38)

$(^{86}\text{Sr}/^{87}\text{Sr})_0 = 1.410 \pm 0.014$

MSWD = 0.7,  $p(\chi^2) = 0.91$

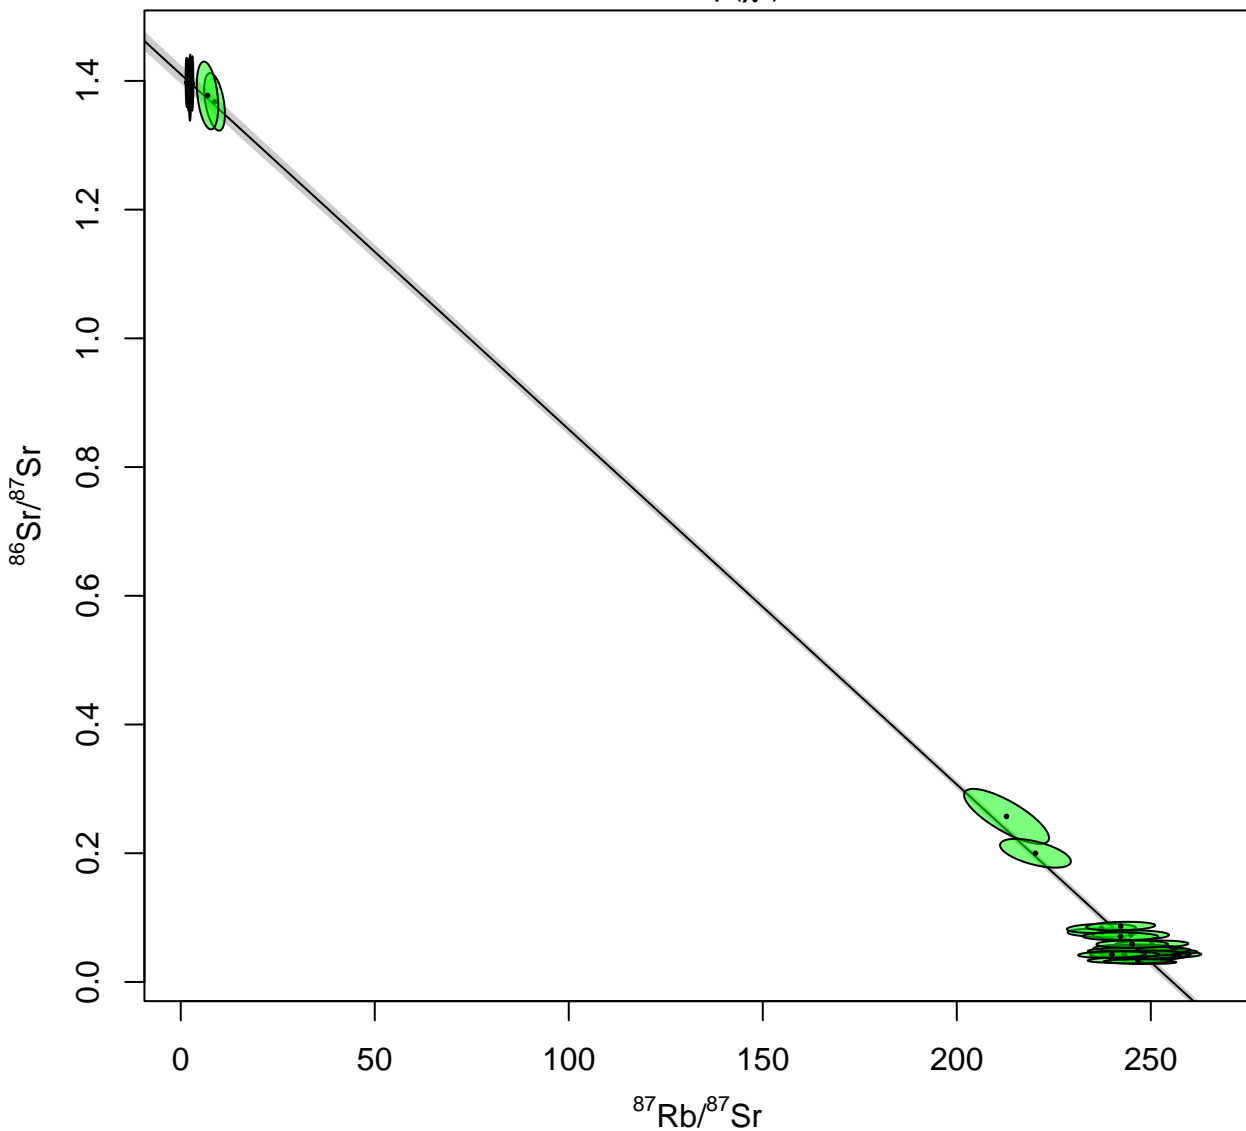

Supplement: Supplementary file 12 [file gchron-6-21-2024-supplement.zip]

age =  $287.8 \pm 37.4$  Ma (n=40)  
 $(^{86}\text{Sr}/^{87}\text{Sr})_0 = 1.4162 \pm 0.0035$   
MSWD = 0.65,  $p(\chi^2) = 0.95$

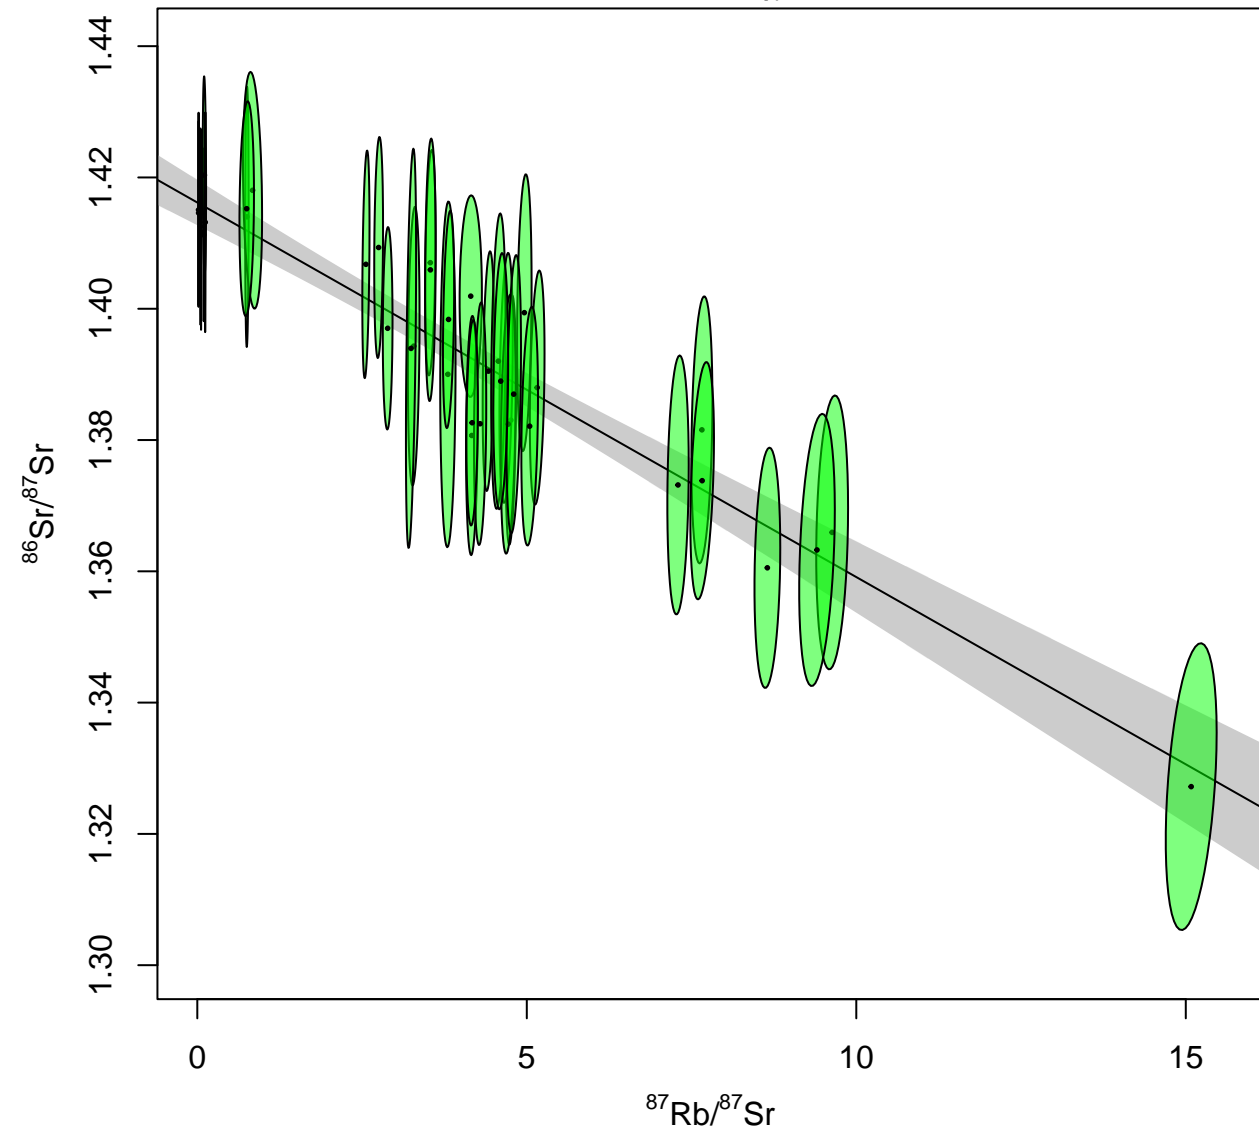

Supplement: Supplementary file 13 [file gchron-6-21-2024-supplement.zip]

age =  $316.17 \pm 3.78$  Ma (n=21)  
 $(^{86}\text{Sr}/^{87}\text{Sr})_0 = 1.37348 \pm 0.00043$   
MSWD = 0.84,  $p(\chi^2) = 0.66$

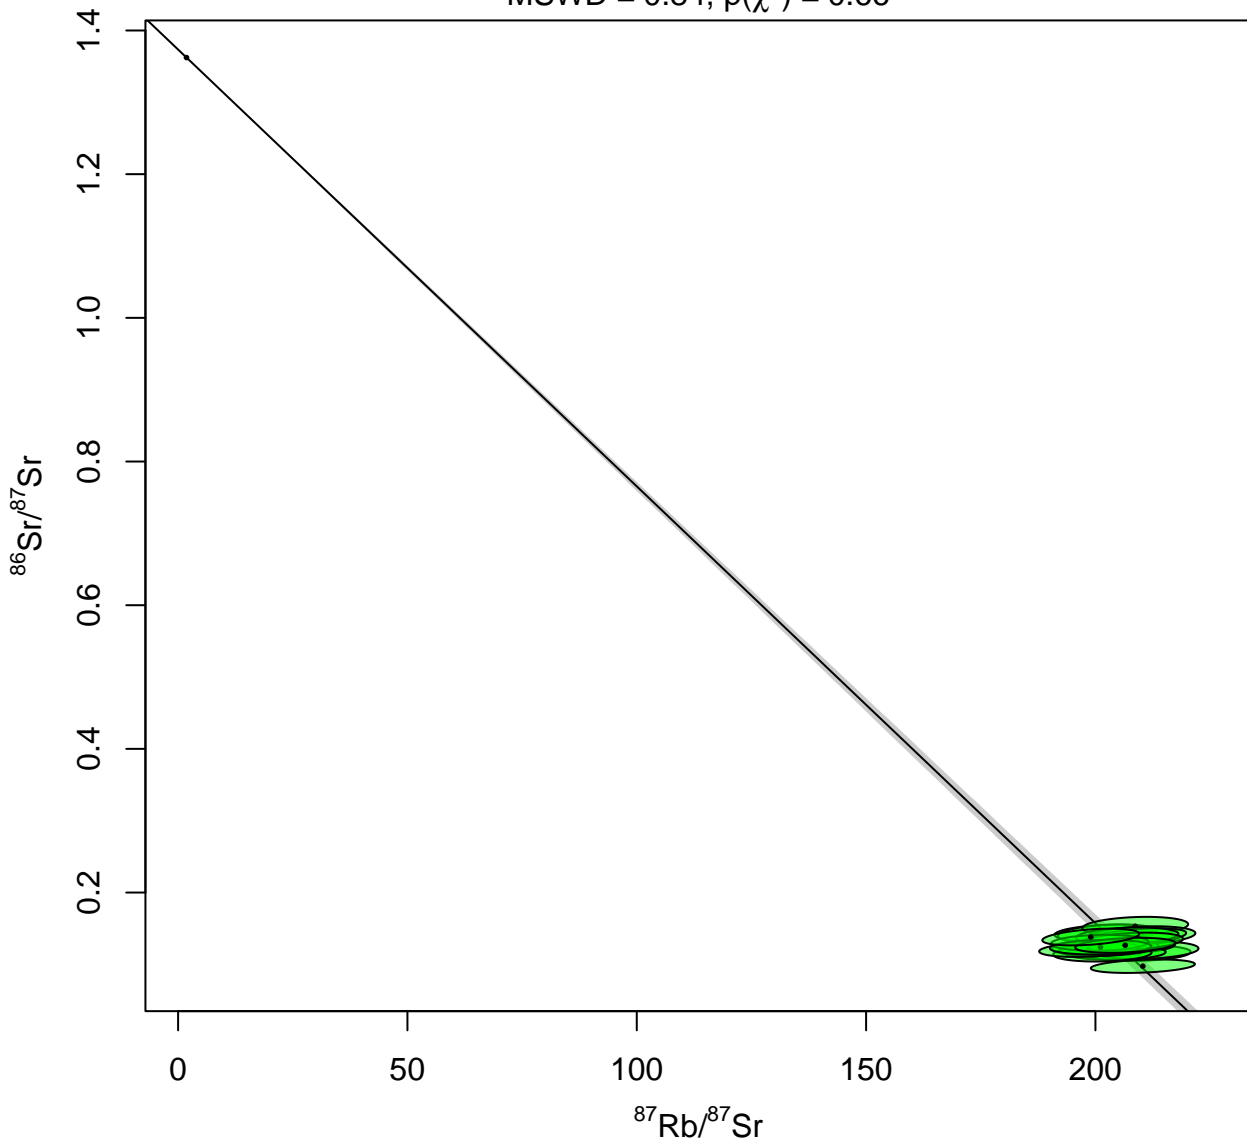

Supplement: Supplementary file 15 [file gchron-6-21-2024-supplement.zip]

age =  $279.46 \pm 2.32$  Ma (n=38)

$(^{86}\text{Sr}/^{87}\text{Sr})_0 = 1.412 \pm 0.011$

MSWD = 0.71,  $p(\chi^2) = 0.91$

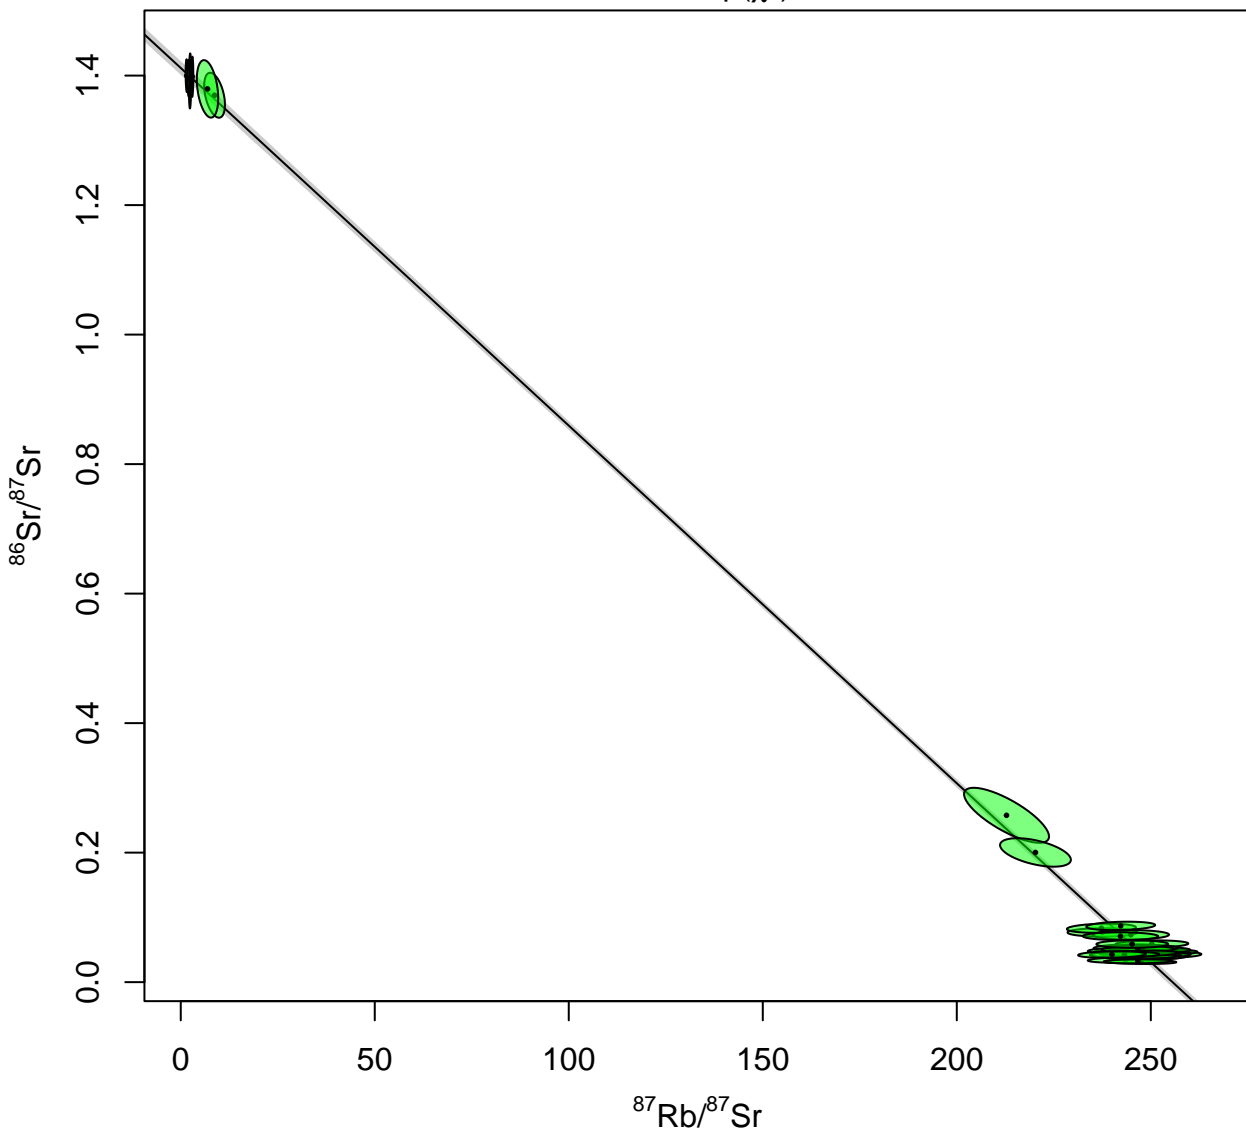

Supplement: Supplementary file 16 [file gchron-6-21-2024-supplement.zip]

age =  $292.2 \pm 14.9$  Ma (n=53)  
 $(^{86}\text{Sr}/^{87}\text{Sr})_0 = 1.4155 \pm 0.0036$   
MSWD = 0.88,  $p(\chi^2) = 0.71$

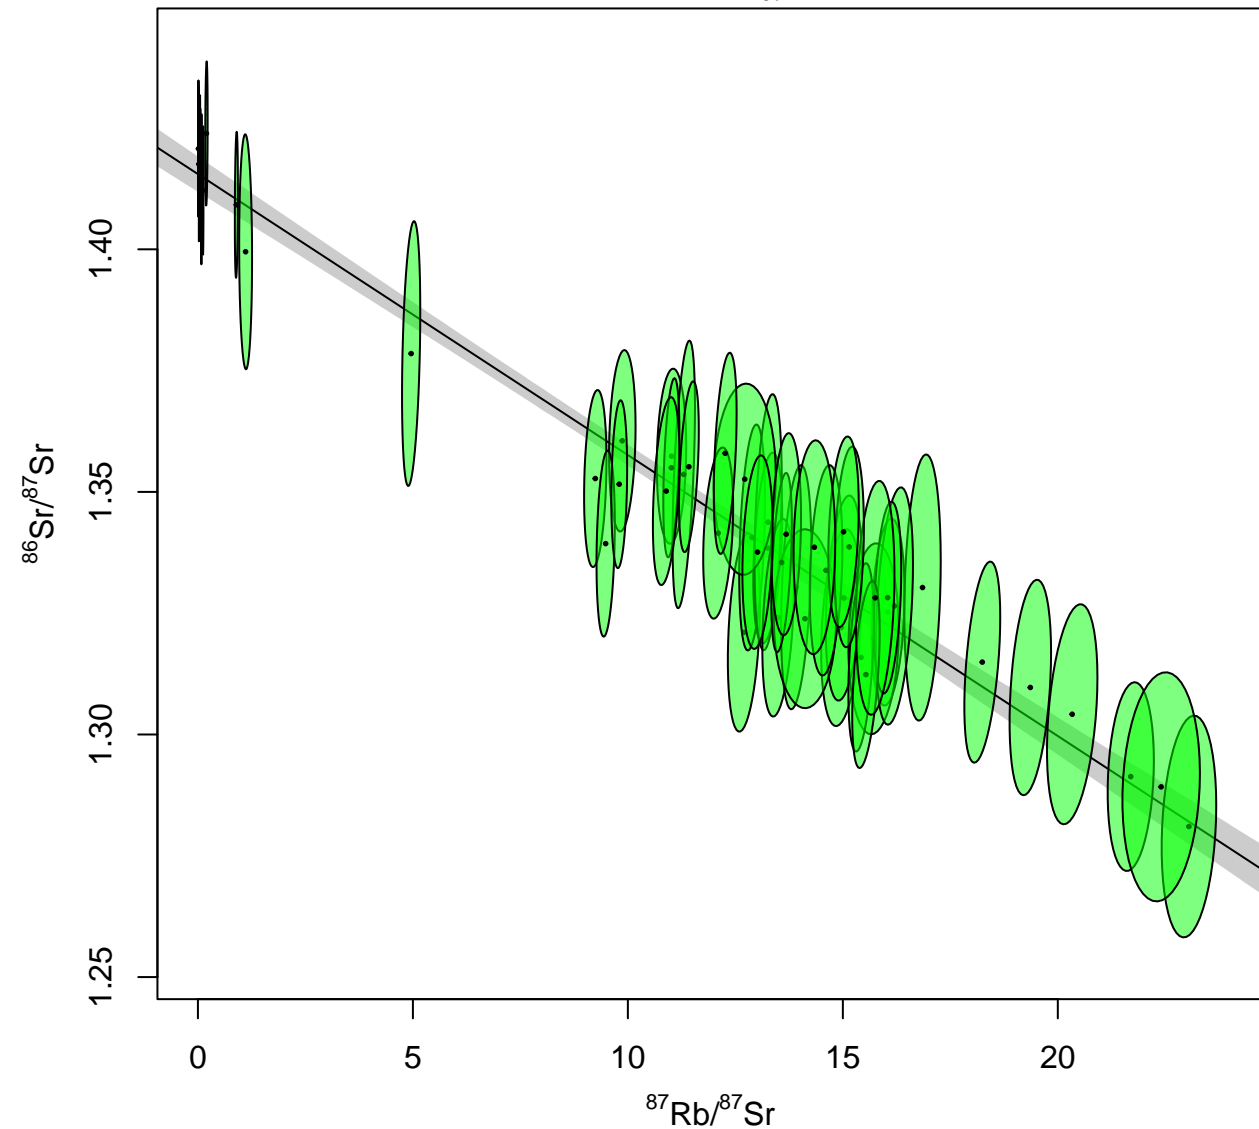

Supplement: Supplementary file 17 [file gchron-6-21-2024-supplement.zip]

age =  $287.69 \pm 2.10$  | 2.29 Ma (n=38)

$(^{86}\text{Sr}/^{87}\text{Sr})_0 = 1.412 \pm 0.011$  | 0.013

MSWD = 1.4,  $p(\chi^2) = 0.045$

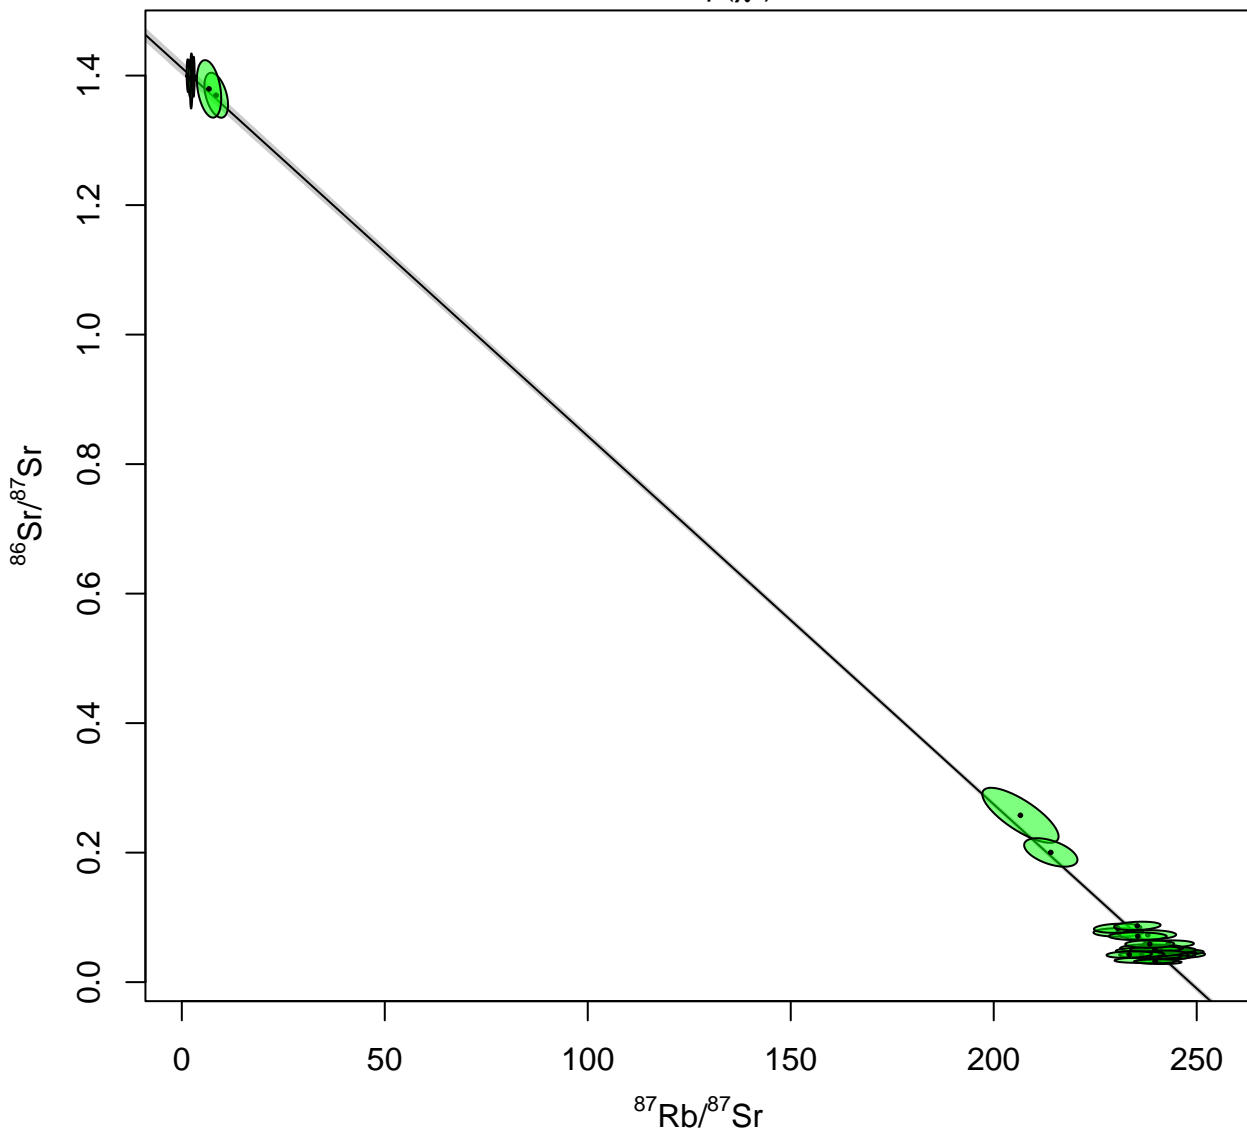

Supplement: Supplementary file 18 [file gchron-6-21-2024-supplement.zip]

age =  $293.3 \pm 38.1$  Ma (n=40)  
 $(^{86}\text{Sr}/^{87}\text{Sr})_0 = 1.4162 \pm 0.0035$   
MSWD = 0.65,  $p(\chi^2) = 0.95$

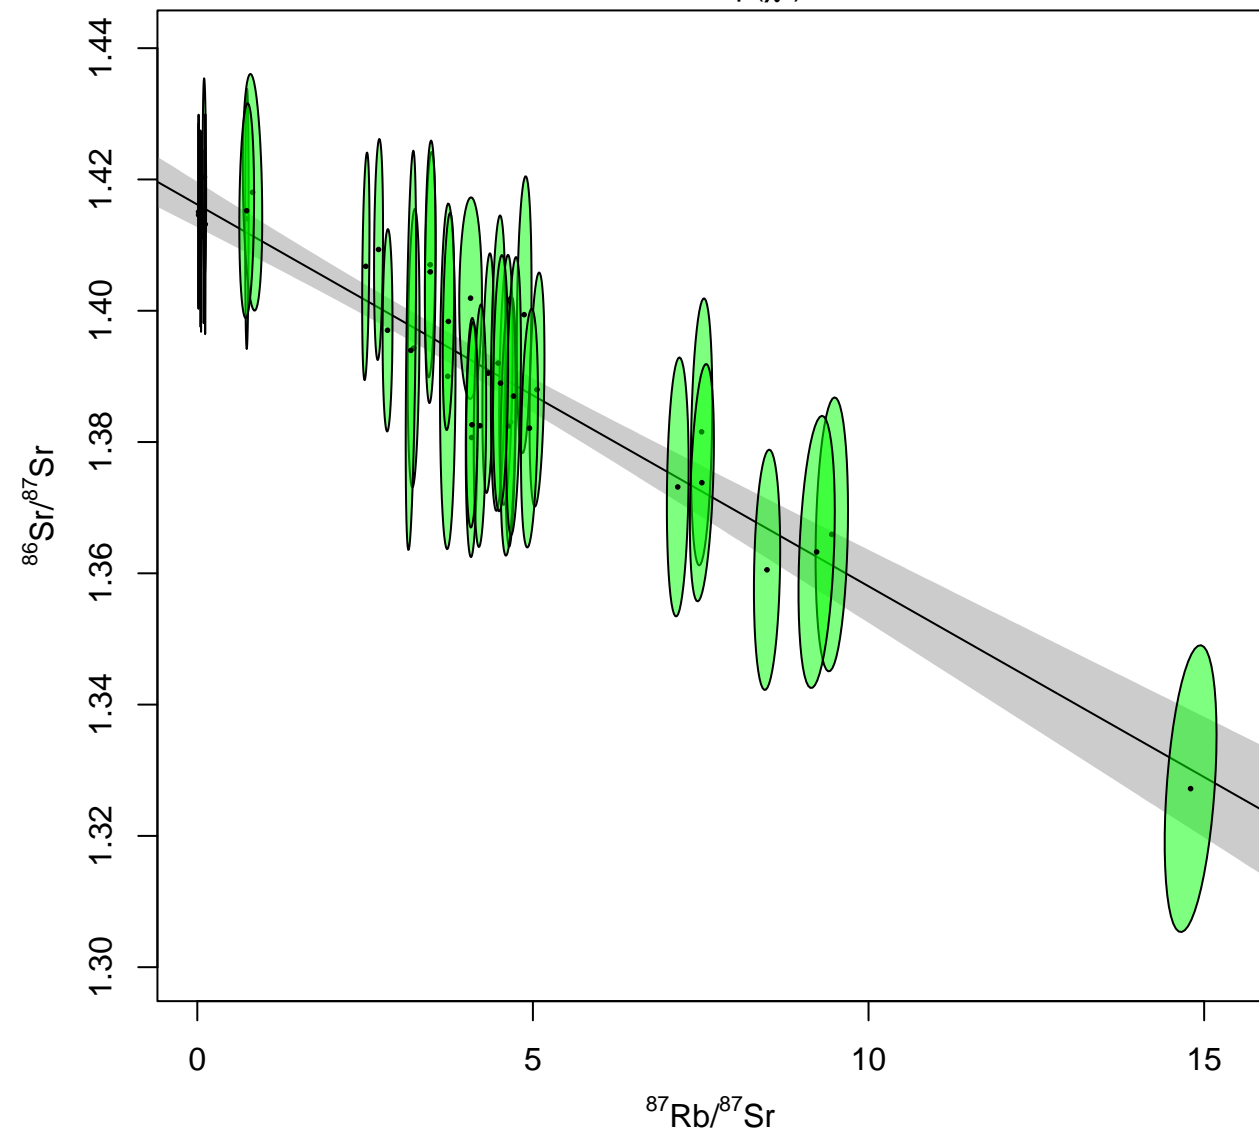

Supplement: Supplementary file 19 [file gchron-6-21-2024-supplement.zip]

age =  $286.7 \pm 14.6$  Ma (n=53)  
 $(^{86}\text{Sr}/^{87}\text{Sr})_0 = 1.4155 \pm 0.0036$   
MSWD = 0.88,  $p(\chi^2) = 0.71$

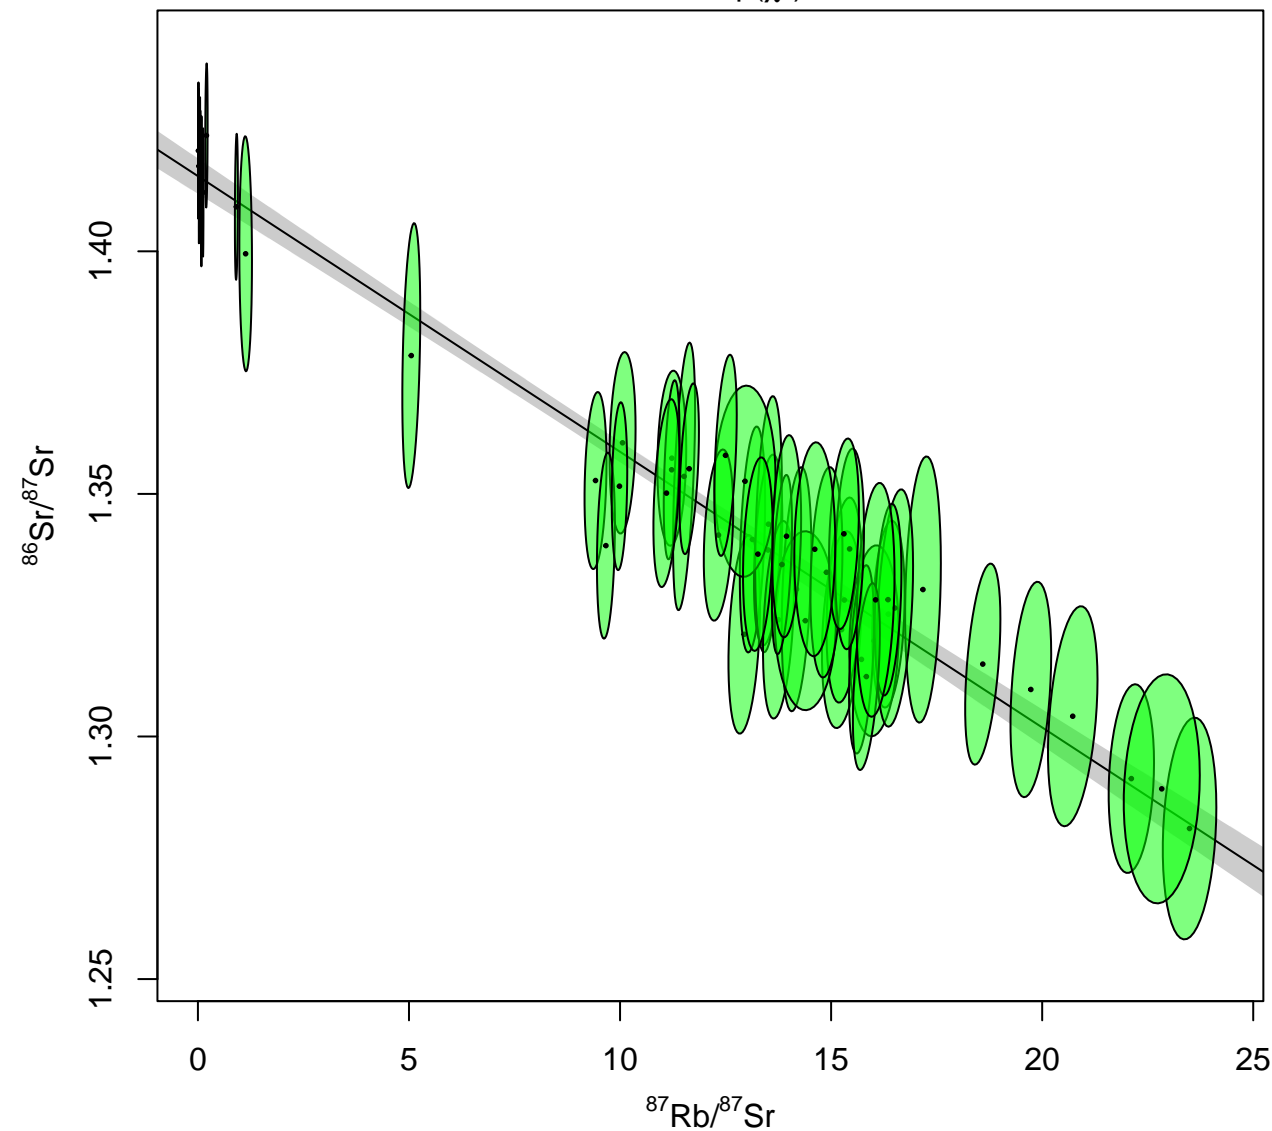

Supplement: Supplementary file 20 [file gchron-6-21-2024-supplement.zip]

age =  $291.20 \pm 2.66$  Ma (n=22)  
 $(^{86}\text{Sr}/^{87}\text{Sr})_0 = 1.4156 \pm 0.0039$   
MSWD = 0.72,  $p(\chi^2) = 0.81$

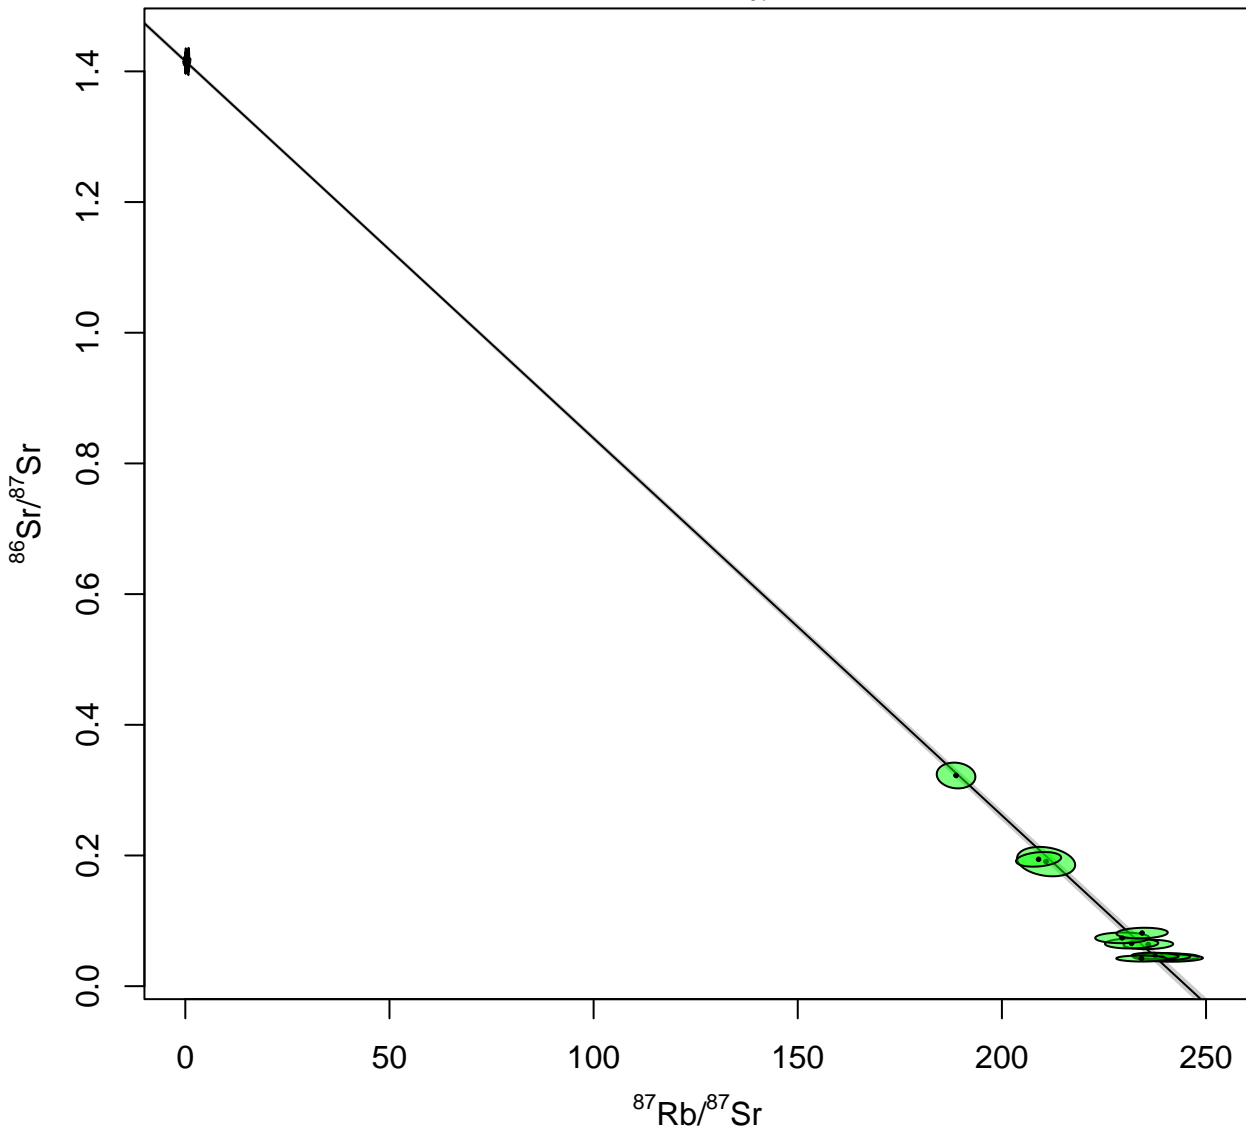

Supplement: Supplementary file 21 [file gchron-6-21-2024-supplement.zip]

age =  $317.55 \pm 2.77$  | 3.83 Ma (n=21)  
 $(^{86}\text{Sr}/^{87}\text{Sr})_0 = 1.37353 \pm 0.00042$  | 0.00070  
MSWD = 2.4,  $p(\chi^2) = 0.00057$

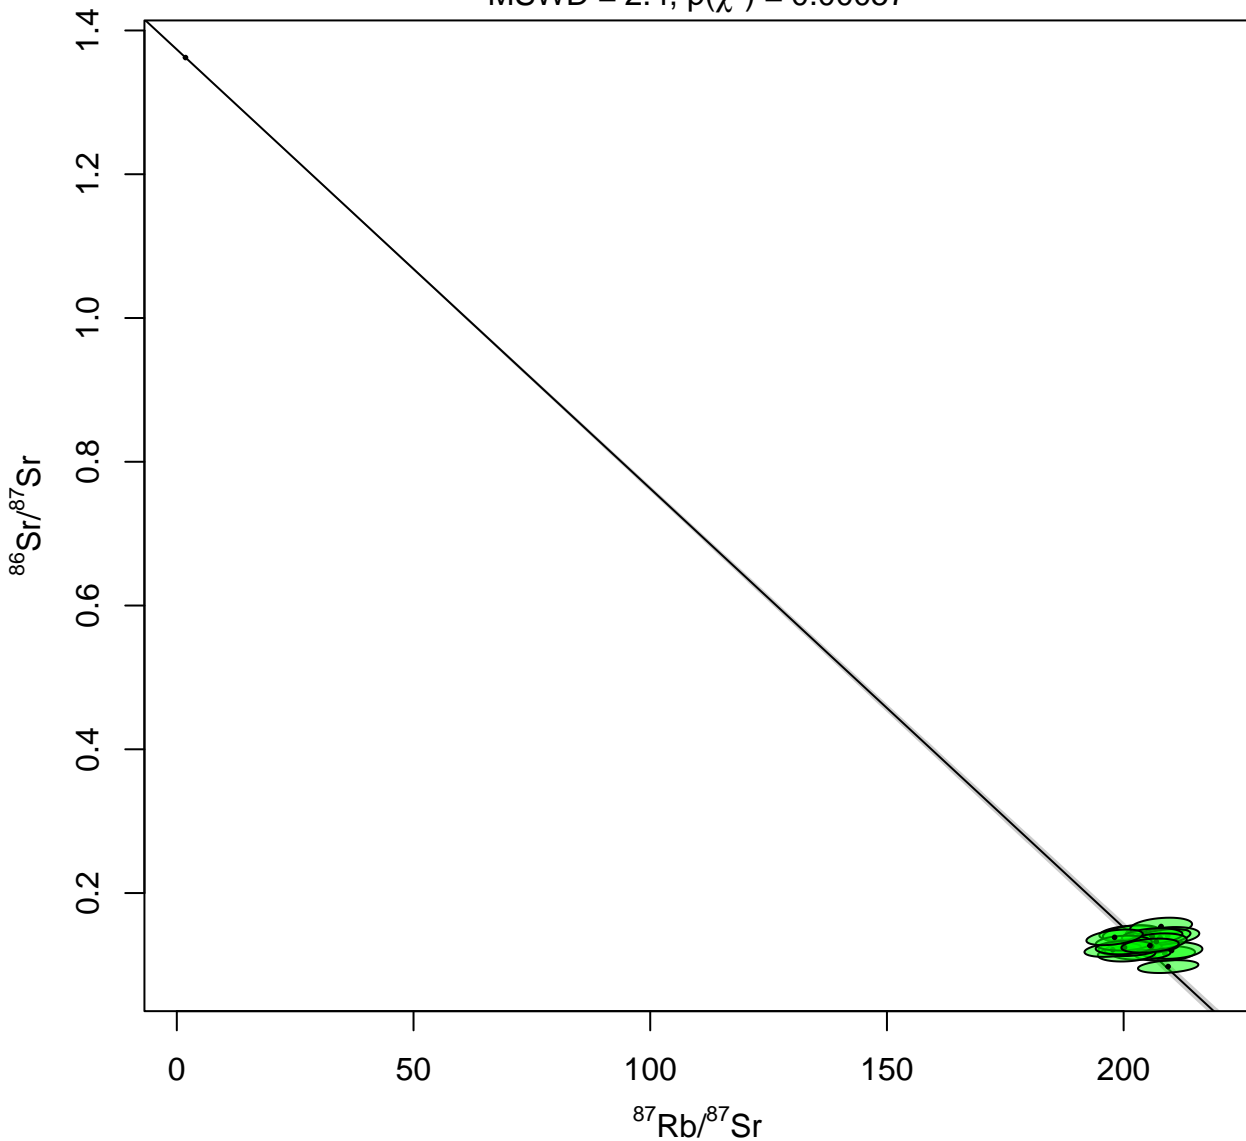

Supplement: Supplementary file 22 [file gchron-6-21-2024-supplement.zip]

age =  $310.66 \pm 2.47$  Ma (n=25)  
 $(^{86}\text{Sr}/^{87}\text{Sr})_0 = 1.37328 \pm 0.00042$   
MSWD = 1.1,  $p(\chi^2) = 0.38$

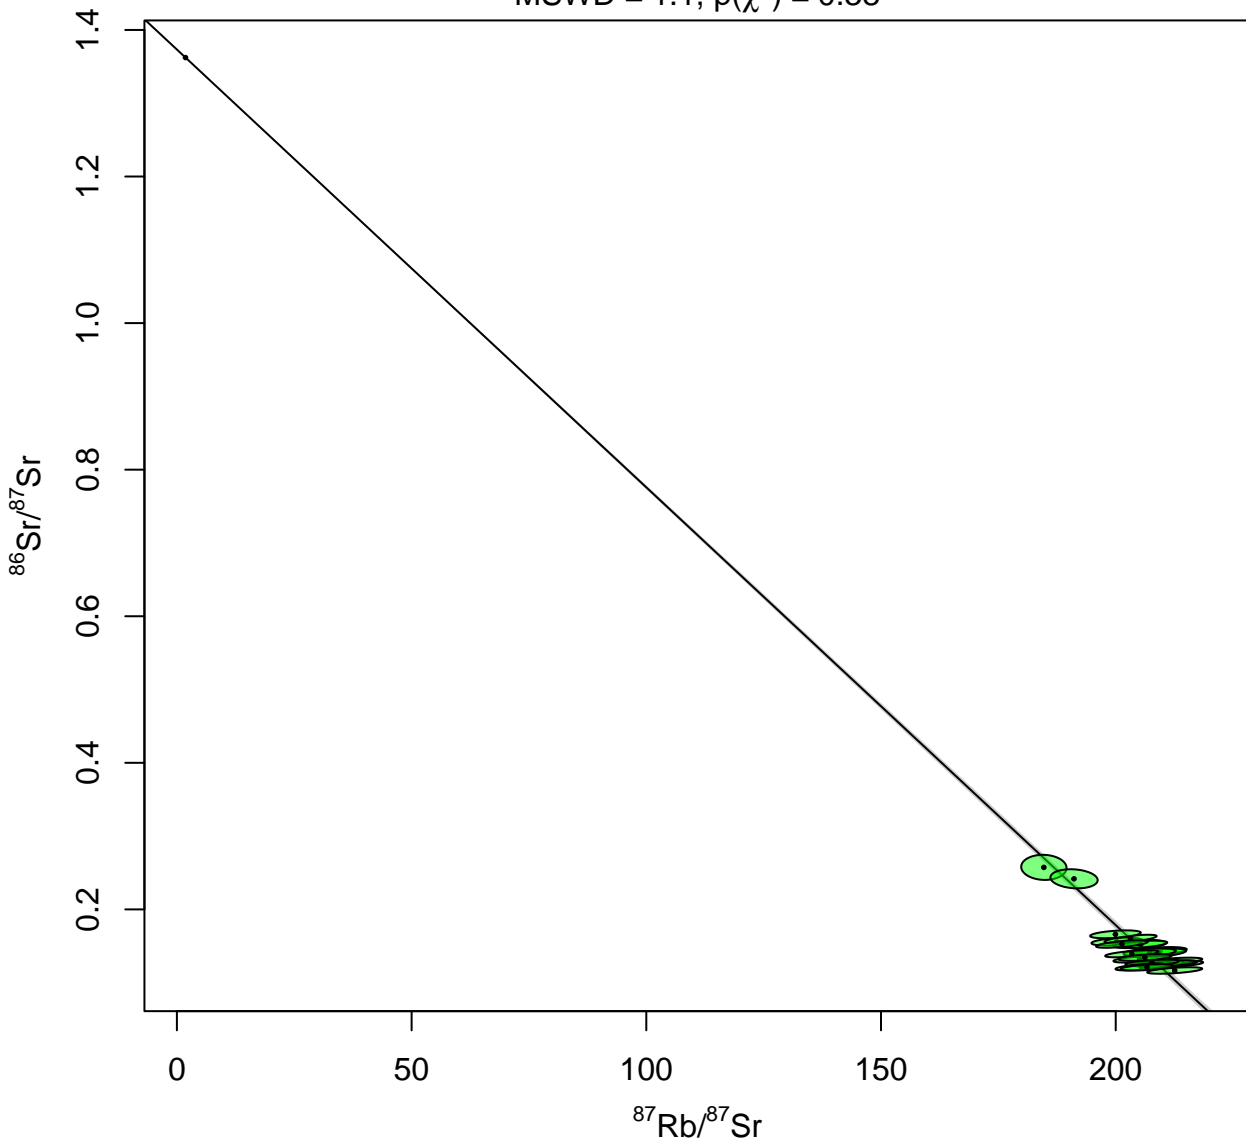

Supplement: Supplementary file 23 [file gchron-6-21-2024-supplement.zip]

age =  $295.9 \pm 92.7$  Ma (n=40)  
 $(^{86}\text{Sr}/^{87}\text{Sr})_0 = 1.4135 \pm 0.0094$   
MSWD = 0.11,  $p(\chi^2) = 1$

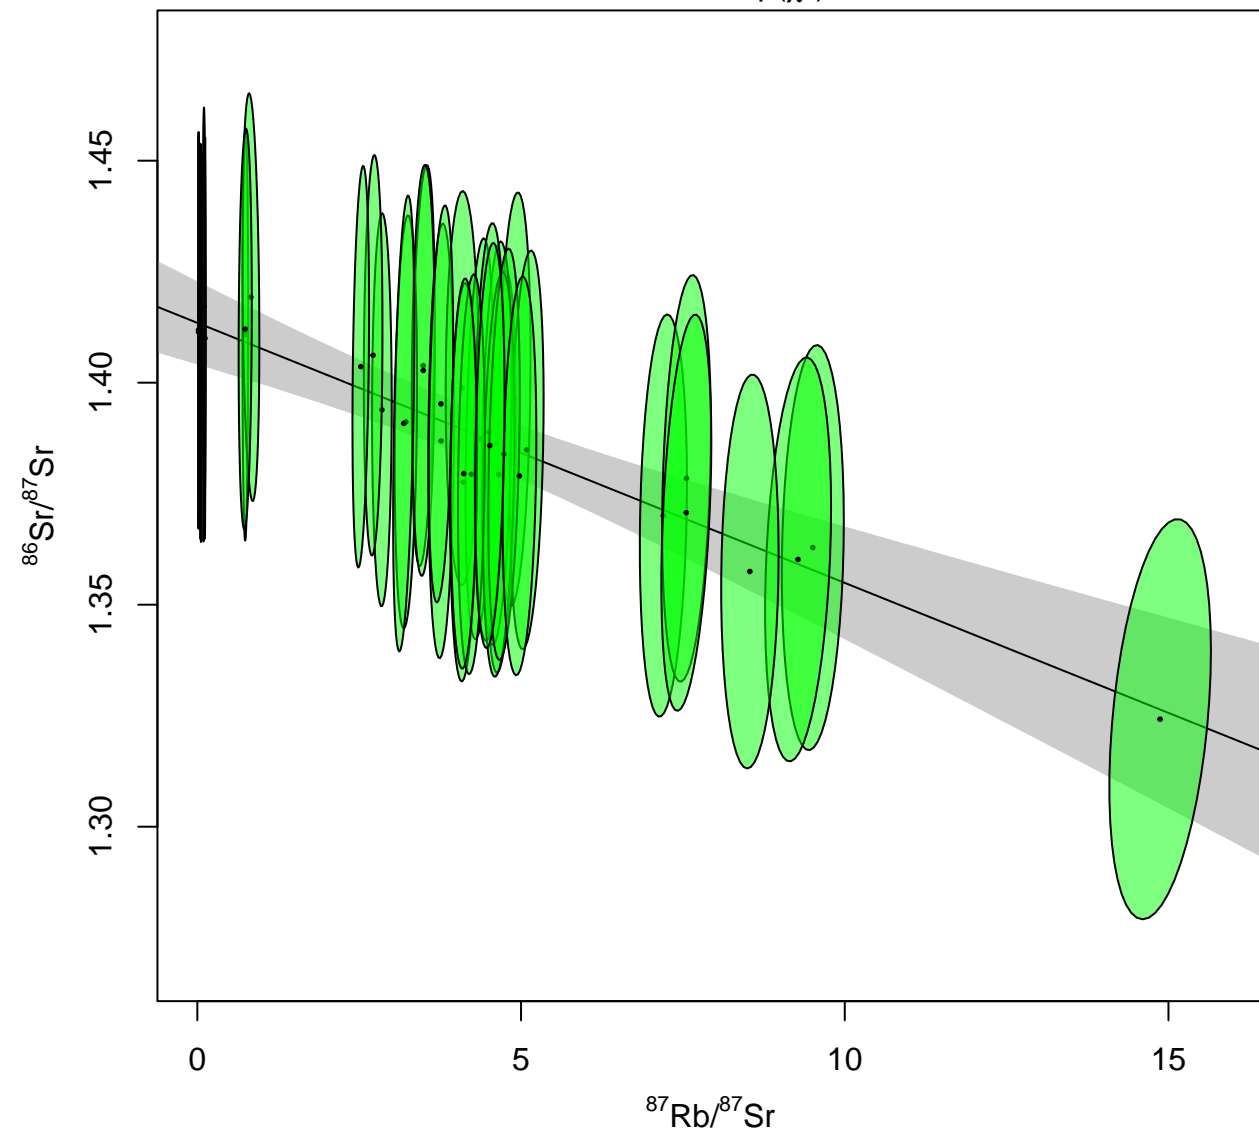

Supplement: Supplementary file 24 [file gchron-6-21-2024-supplement.zip]

age =  $290.17 \pm 3.09$  Ma (n=22)

$(^{86}\text{Sr}/^{87}\text{Sr})_0 = 1.4166 \pm 0.0036$

MSWD = 1.1,  $p(\chi^2) = 0.39$

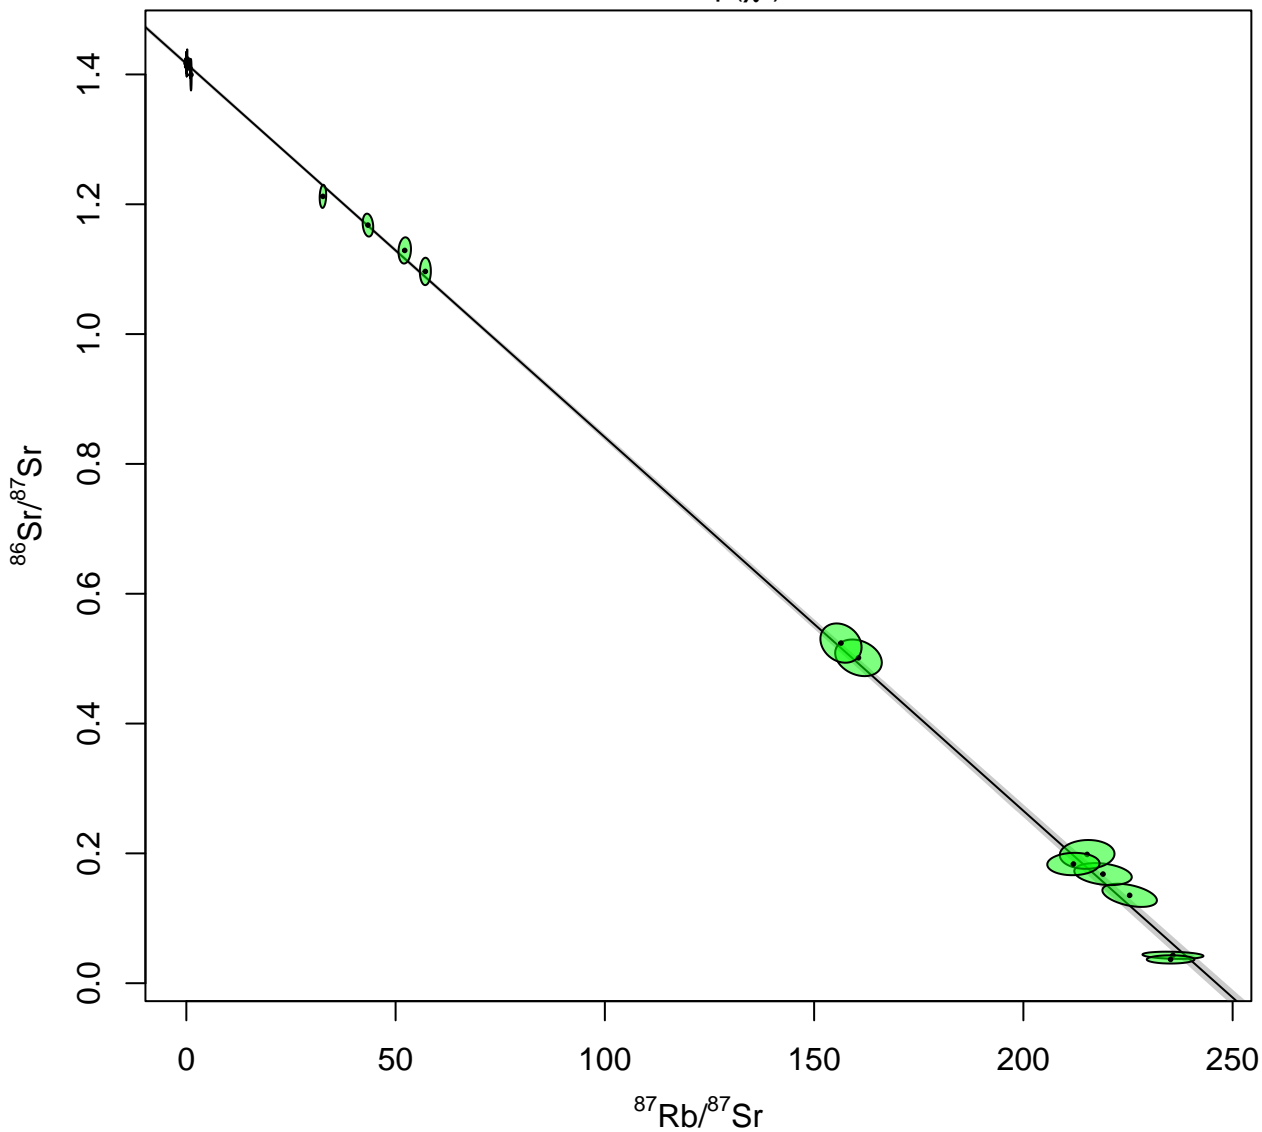

Supplement: Supplementary file 25 [file gchron-6-21-2024-supplement.zip]

age =  $281.0 \pm 35.7$  Ma (n=45)  
 $(^{86}\text{Sr}/^{87}\text{Sr})_0 = 1.4159 \pm 0.0030$   
MSWD = 0.68,  $p(\chi^2) = 0.95$

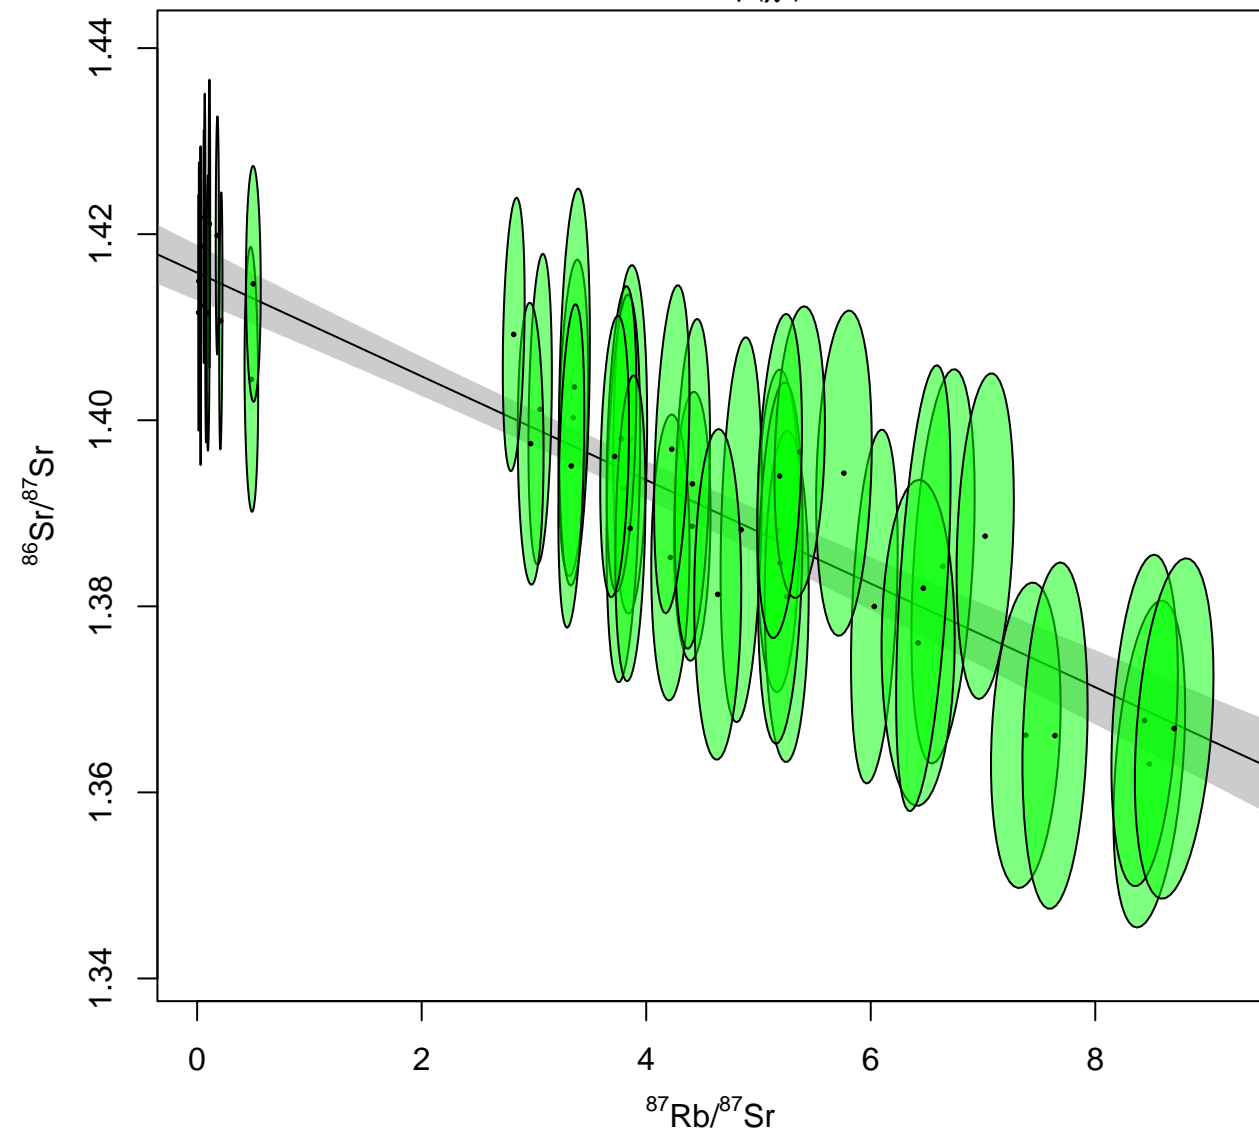

Supplement: Supplementary file 26 [file gchron-6-21-2024-supplement.zip]

age =  $327.56 \pm 3.85$  Ma (n=25)  
 $(^{86}\text{Sr}/^{87}\text{Sr})_0 = 1.37388 \pm 0.00044$   
MSWD = 0.27,  $p(\chi^2) = 1$

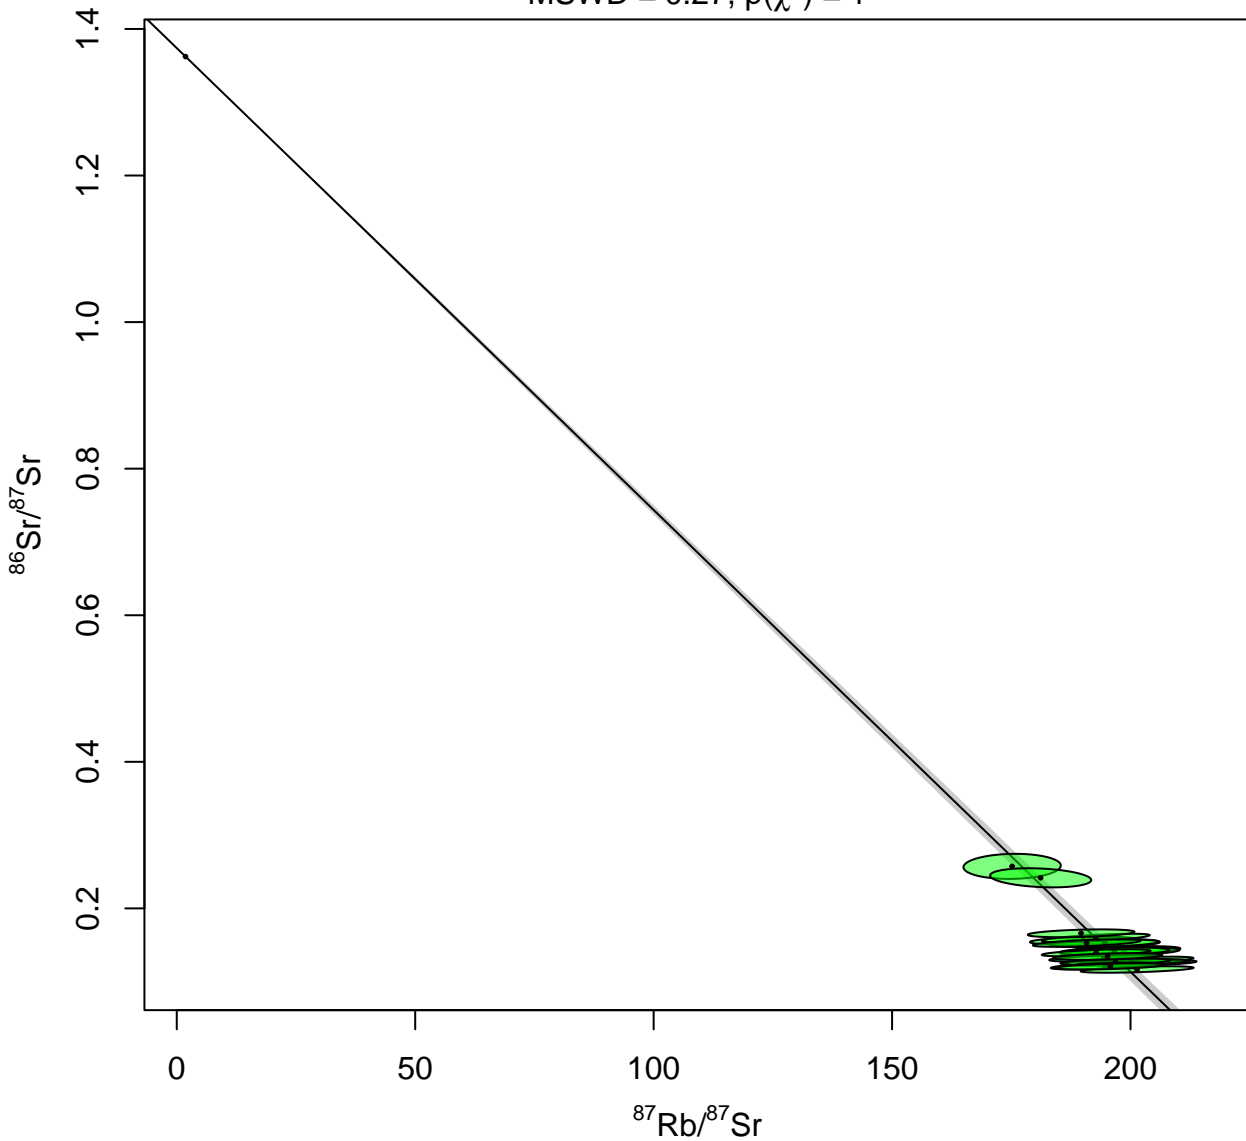

Supplement: Supplementary file 27 [file gchron-6-21-2024-supplement.zip]

age =  $290.0 \pm 36.7$  Ma (n=45)  
 $(^{86}\text{Sr}/^{87}\text{Sr})_0 = 1.4159 \pm 0.0030$   
MSWD = 0.69,  $p(\chi^2) = 0.94$

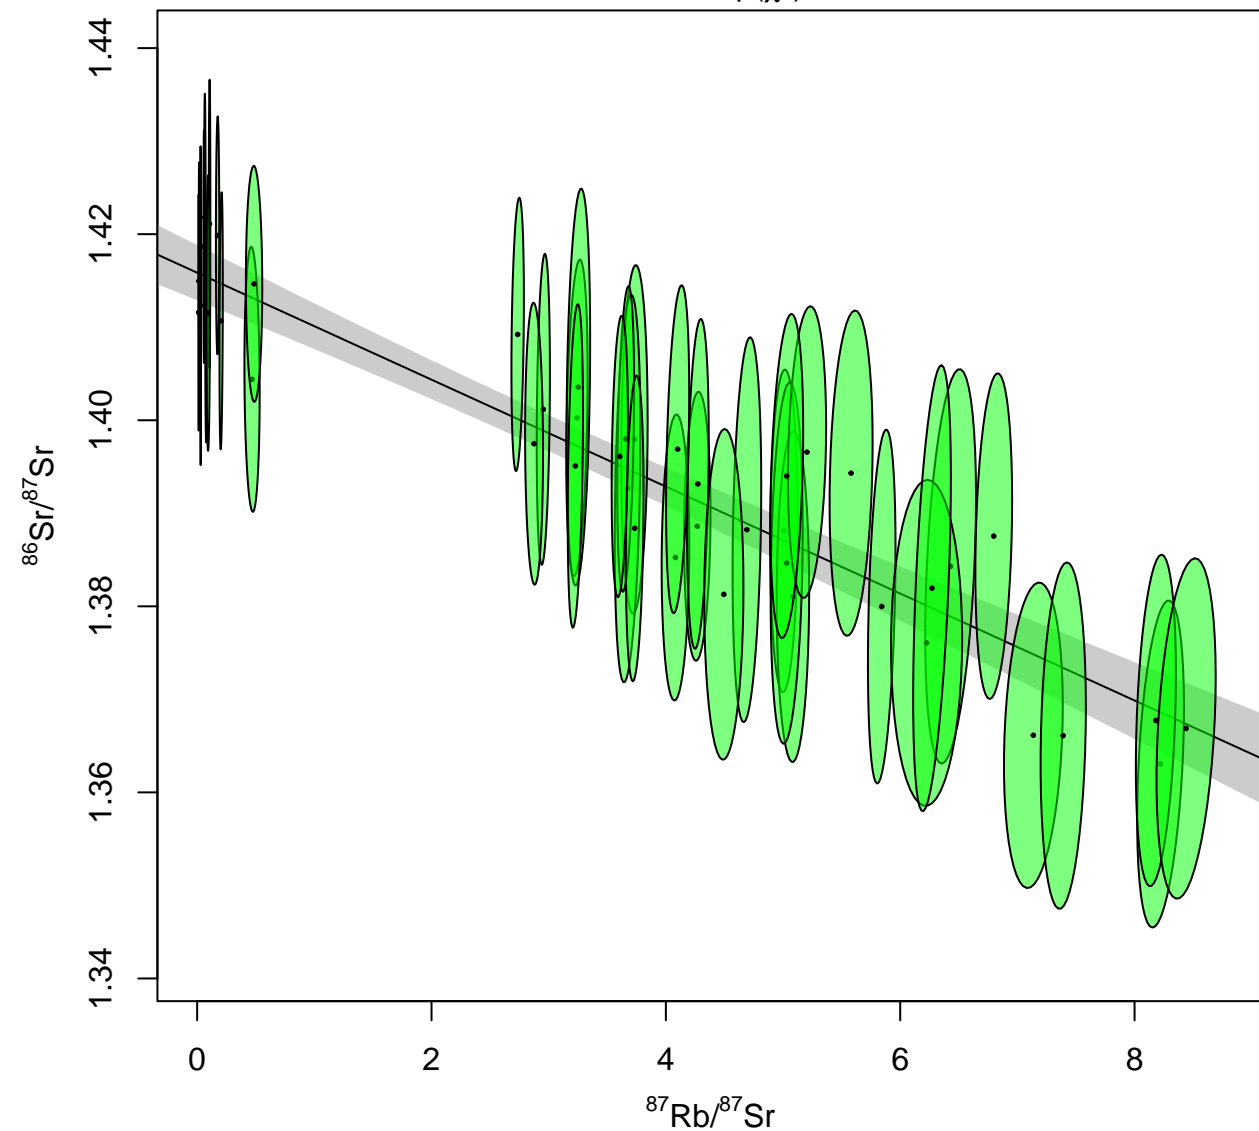

Supplement: Supplementary file 28 [file gchron-6-21-2024-supplement.zip]

age =  $284.7 \pm 15.1$  Ma (n=6)  
 $(^{86}\text{Sr}/^{87}\text{Sr})_0 = 1.4161 \pm 0.0031$   
MSWD = 0.4,  $p(\chi^2) = 0.81$

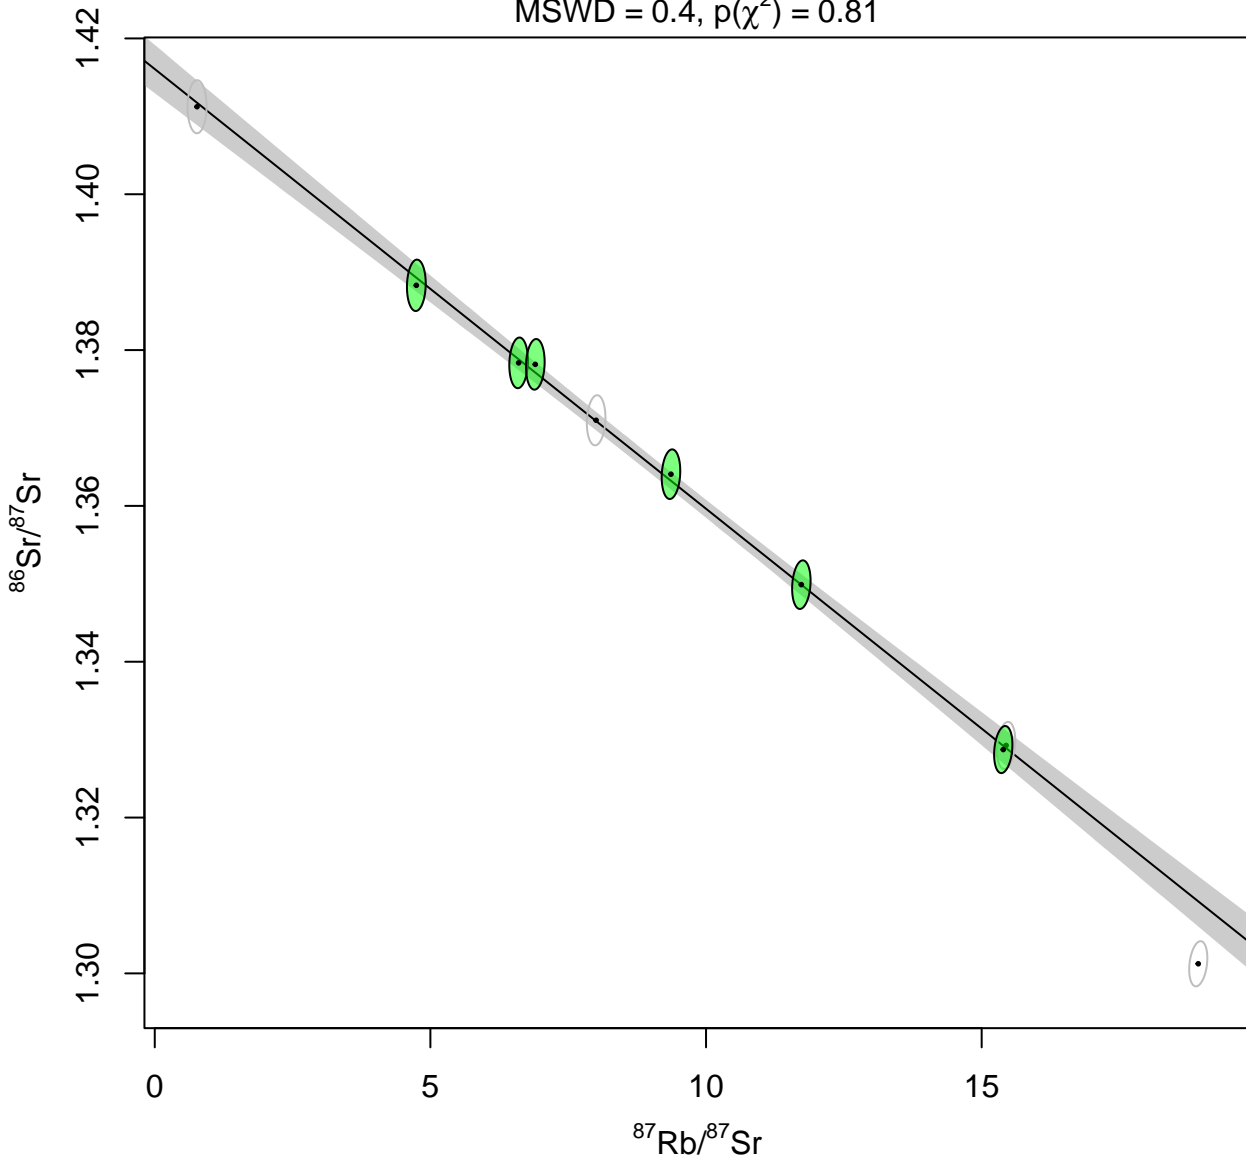

age =  $283.08 \pm 9.80$  Ma (n=9)  
 $(^{86}\text{Sr}/^{87}\text{Sr})_0 = 1.4158 \pm 0.0020$   
MSWD = 0.24,  $p(\chi^2) = 0.97$

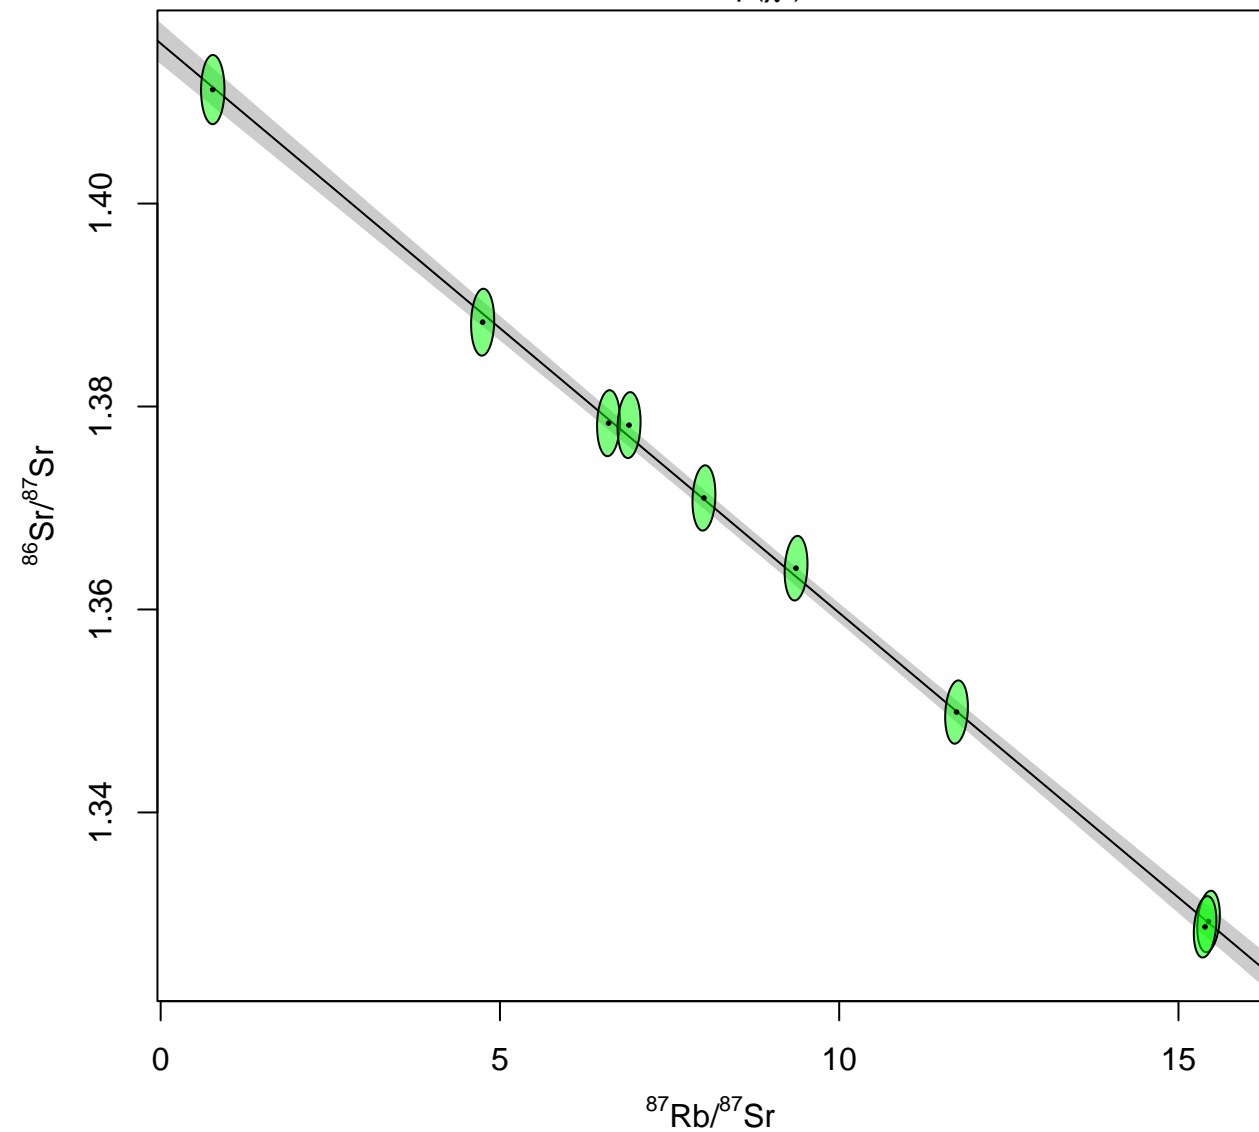

Supplement: Supplementary file 29 [file gchron-6-21-2024-supplement.zip]

age =  $288.23 \pm 4.70$  Ma (n=22)

$(^{86}\text{Sr}/^{87}\text{Sr})_0 = 1.413 \pm 0.010$

MSWD = 0.28,  $p(\chi^2) = 1$

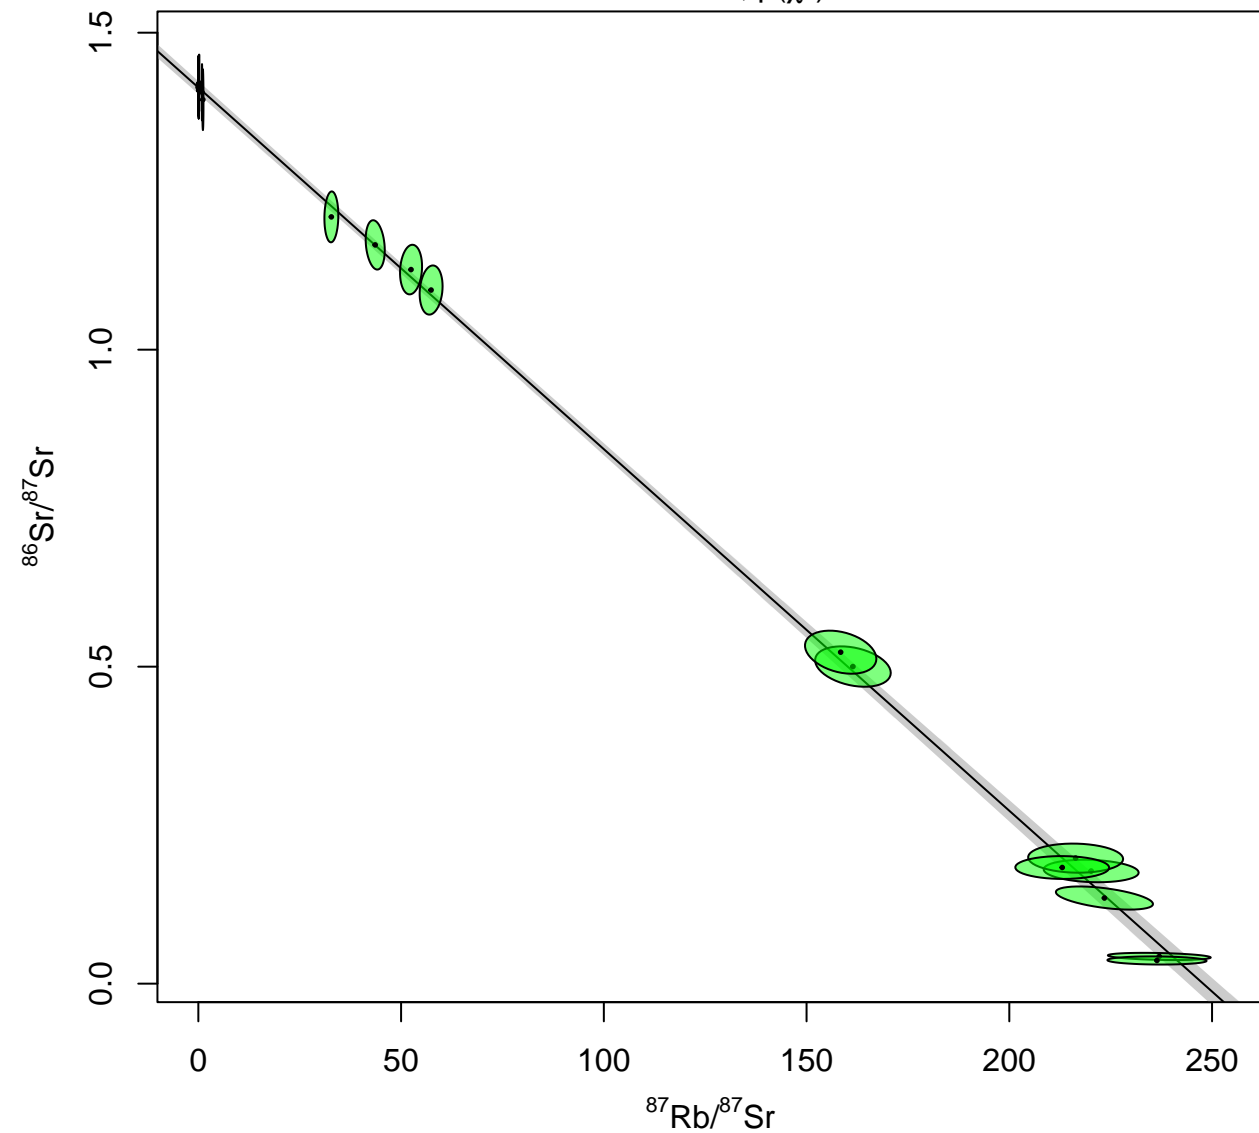

Supplement: Supplementary file 30 [file gchron-6-21-2024-supplement.zip]

age =  $289.9 \pm 15.5$  Ma (n=53)  
 $(^{86}\text{Sr}/^{87}\text{Sr})_0 = 1.4160 \pm 0.0038$   
MSWD = 0.86,  $p(\chi^2) = 0.75$

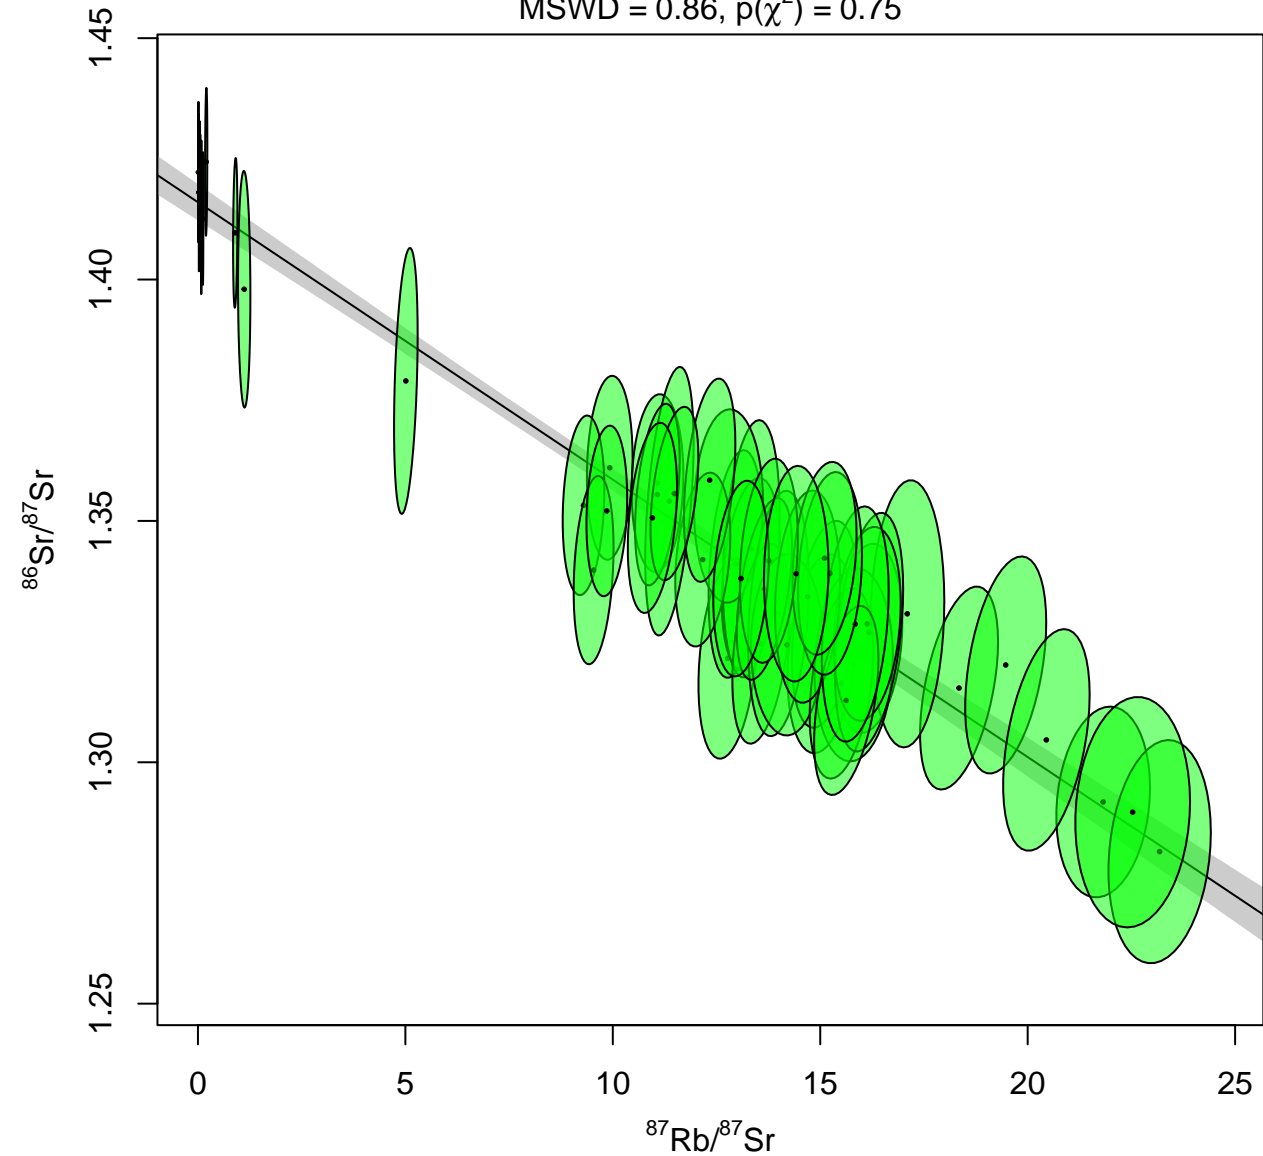

Supplement: Supplementary file 31 [file gchron-6-21-2024-supplement.zip]

age =  $312.10 \pm 1.77$  | 5.07 Ma (n=7)  
 $(^{86}\text{Sr}/^{87}\text{Sr})_0 = 1.37701 \pm 0.00024$  | 0.00069  
MSWD = 4.8,  $p(\chi^2) = 0.00022$

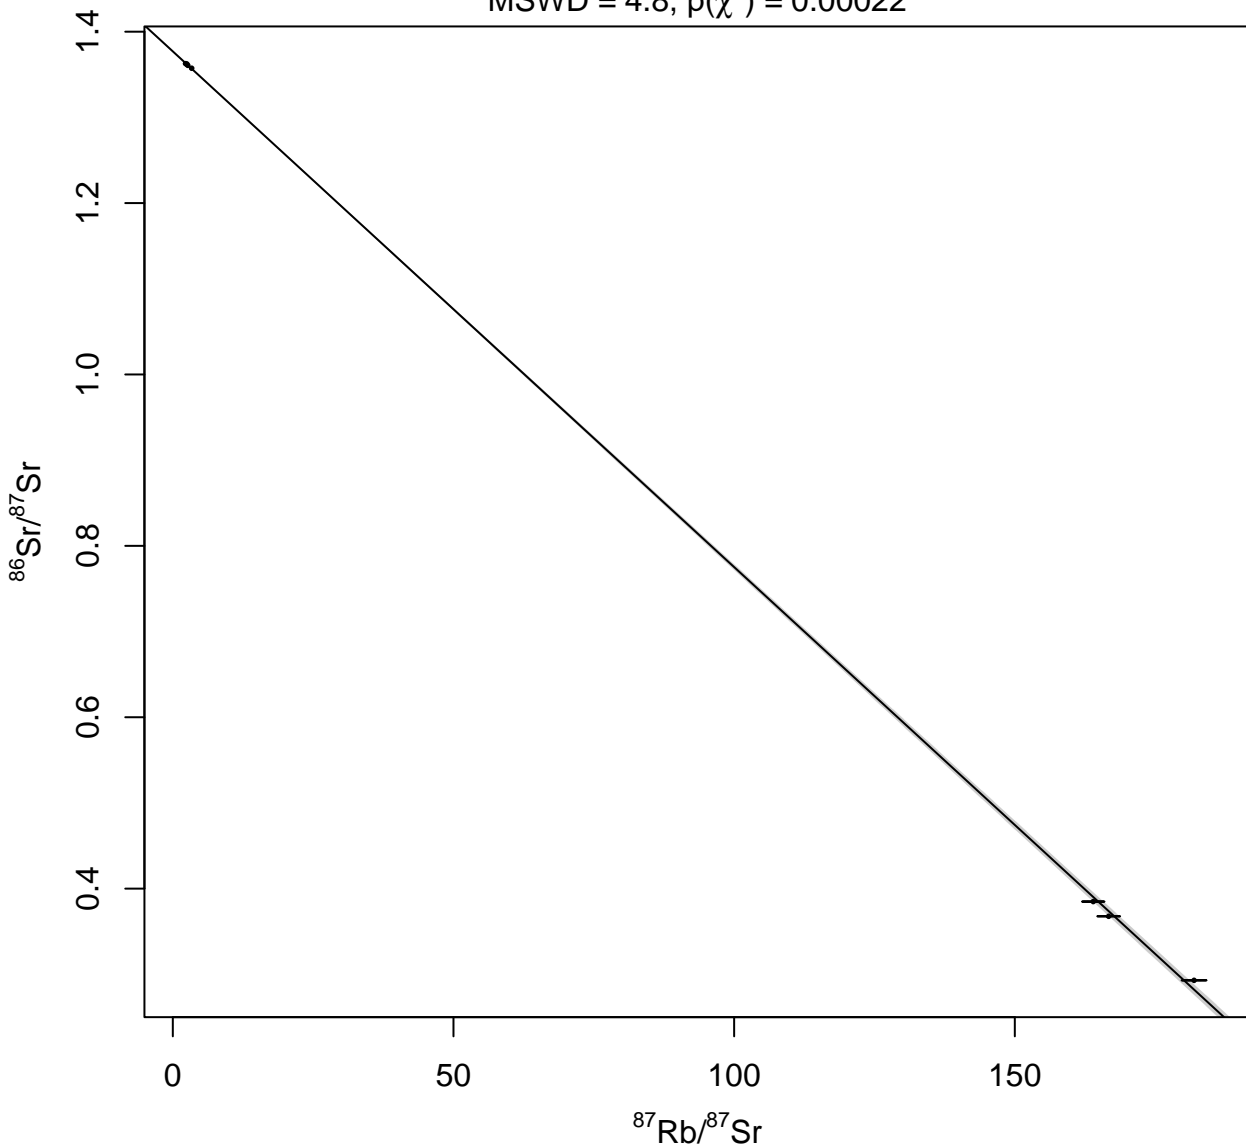

Supplement: Supplementary file 32 [file gchron-6-21-2024-supplement.zip]

age =  $293.7 \pm 39.3$  Ma (n=40)  
 $(^{86}\text{Sr}/^{87}\text{Sr})_0 = 1.4169 \pm 0.0036$   
MSWD = 0.65,  $p(\chi^2) = 0.95$

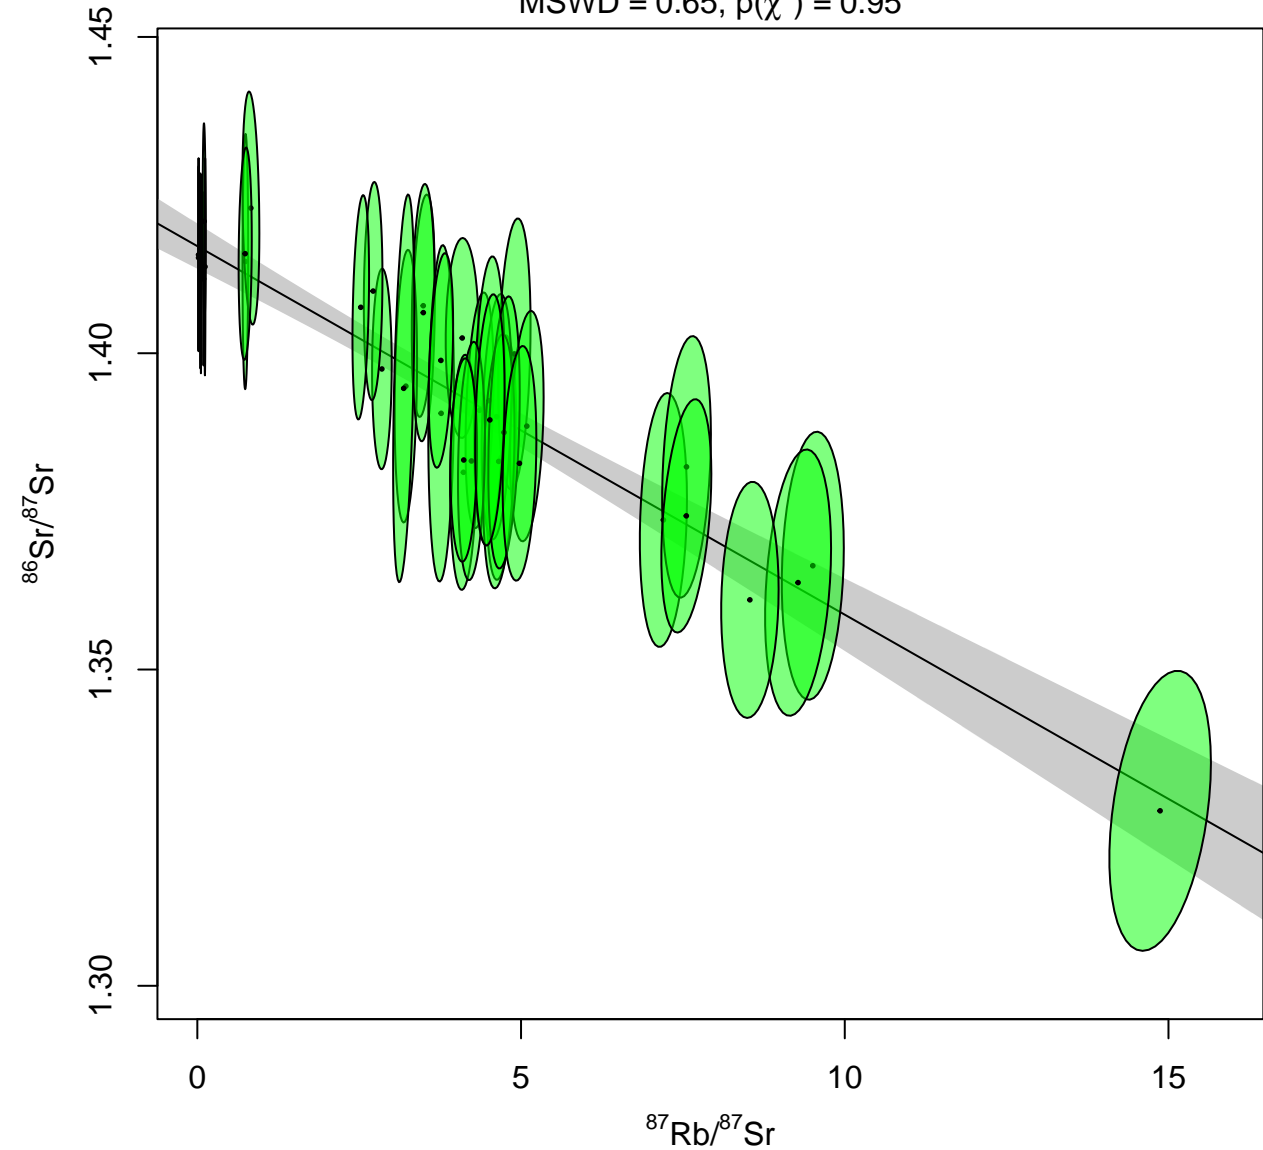

Supplement: Supplementary file 33 [file gchron-6-21-2024-supplement.zip]

age =  $290.3 \pm 14.1$  Ma (n=57)  
 $(^{86}\text{Sr}/^{87}\text{Sr})_0 = 1.4144 \pm 0.0043$   
MSWD = 0.87,  $p(\chi^2) = 0.73$

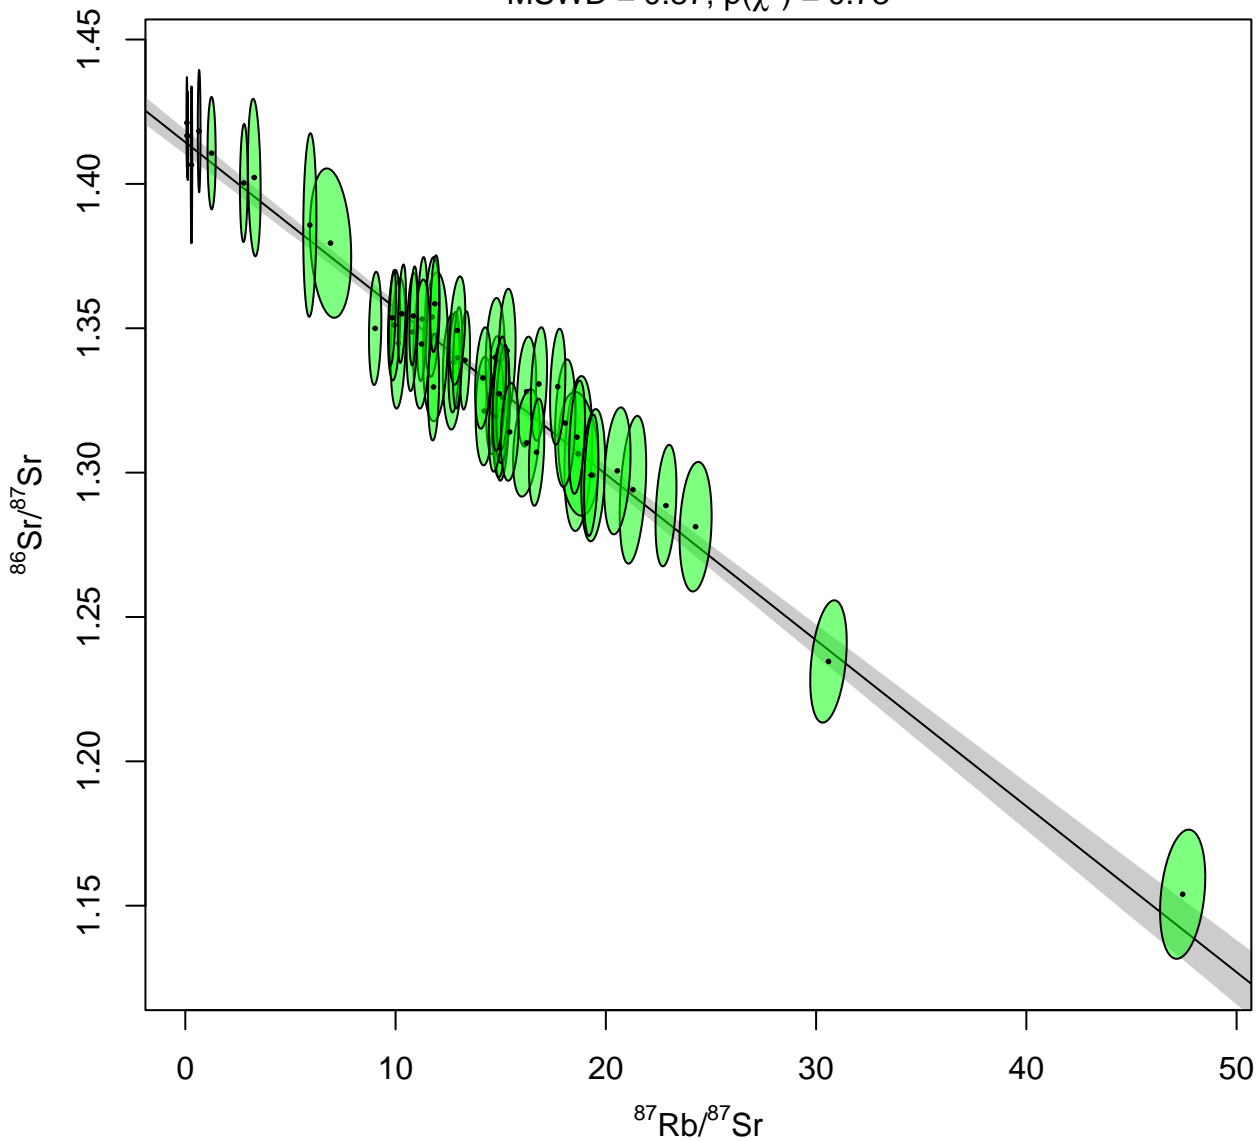

Supplement: Supplementary file 34 [file gchron-6-21-2024-supplement.zip]

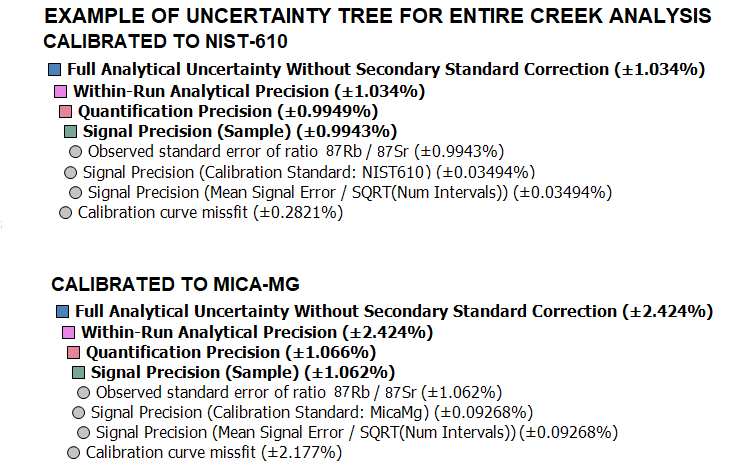

Supplement: Supplementary file 35 [file gchron-6-21-2024-supplement.zip › Supplementary File S3_rev.png]

age =  $283.5 \pm 13.7$  Ma (n=57)  
 $(^{86}\text{Sr}/^{87}\text{Sr})_0 = 1.4144 \pm 0.0043$   
MSWD = 0.88,  $p(\chi^2) = 0.73$

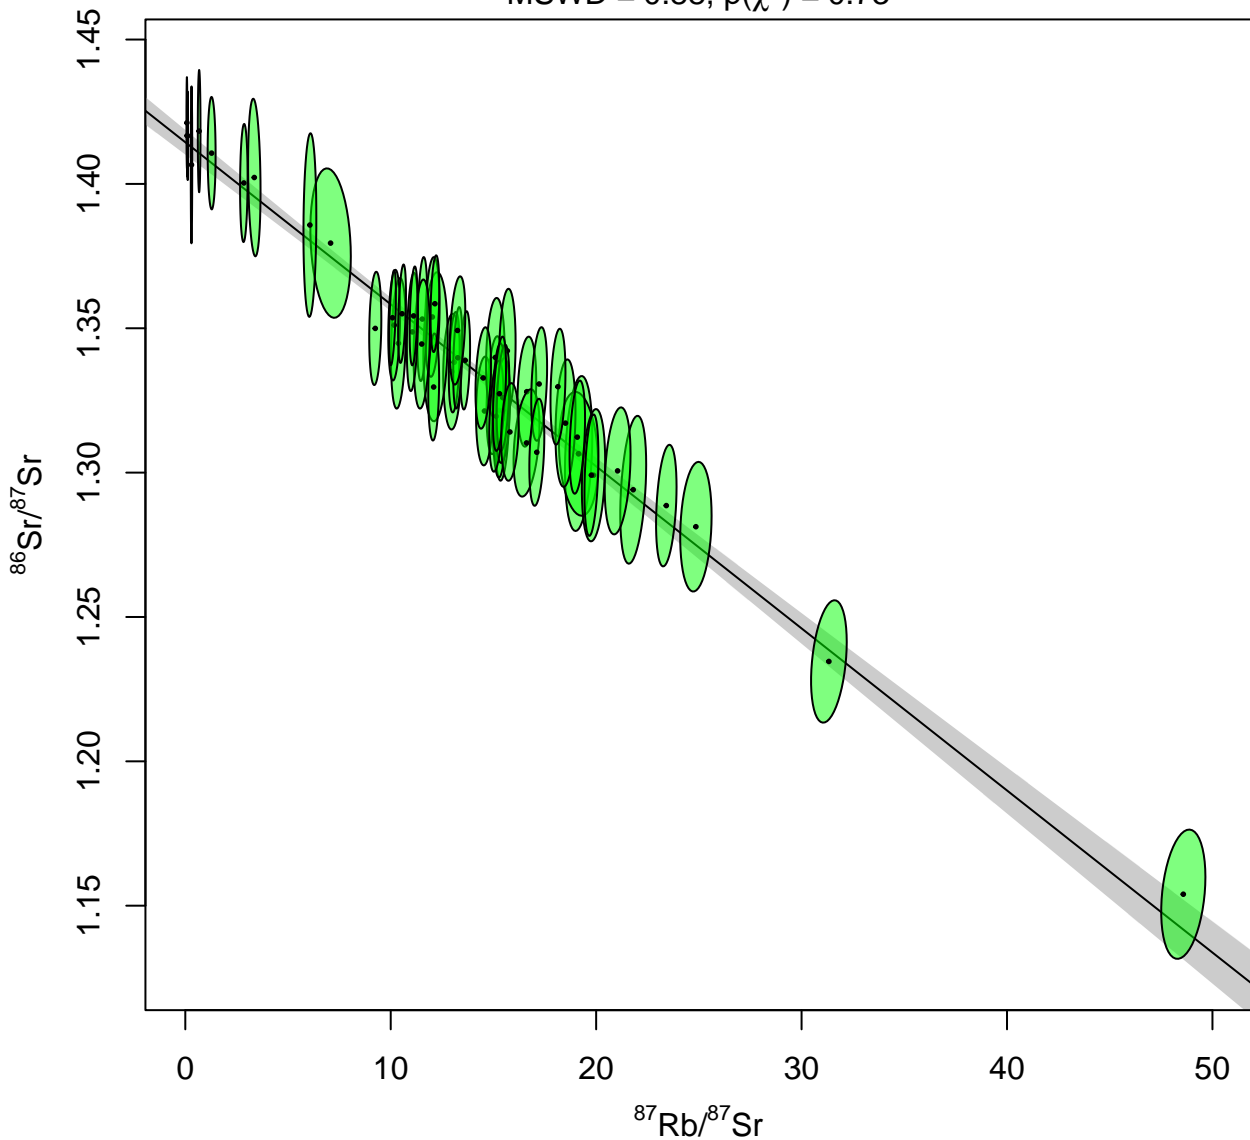

Supplement: Supplementary file 36 [file gchron-6-21-2024-supplement.zip]

age =  $287.08 \pm 2.17$  | 2.43 Ma (n=44)  
 $(^{86}\text{Sr}/^{87}\text{Sr})_0 = 1.4140 \pm 0.0056$  | 0.0073  
MSWD = 1.6,  $p(\chi^2) = 0.0077$

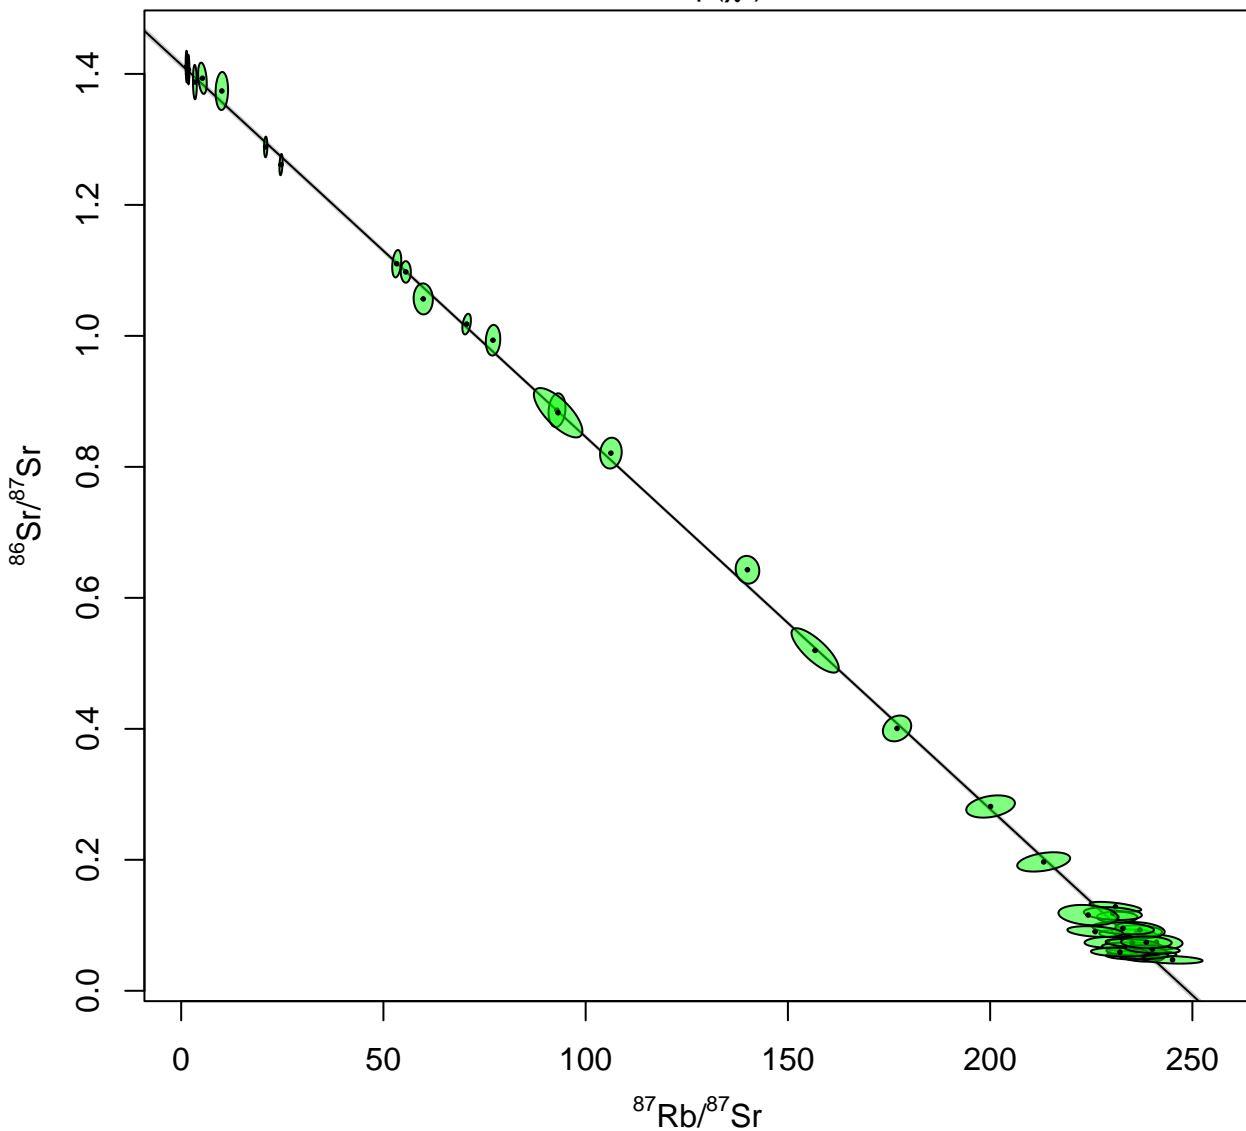

Supplement: Supplementary file 37 [file gchron-6-21-2024-supplement.zip]

age =  $283.1 \pm 35.8$  Ma (n=45)  
 $(^{86}\text{Sr}/^{87}\text{Sr})_0 = 1.4159 \pm 0.0030$   
MSWD = 0.69,  $p(\chi^2) = 0.94$

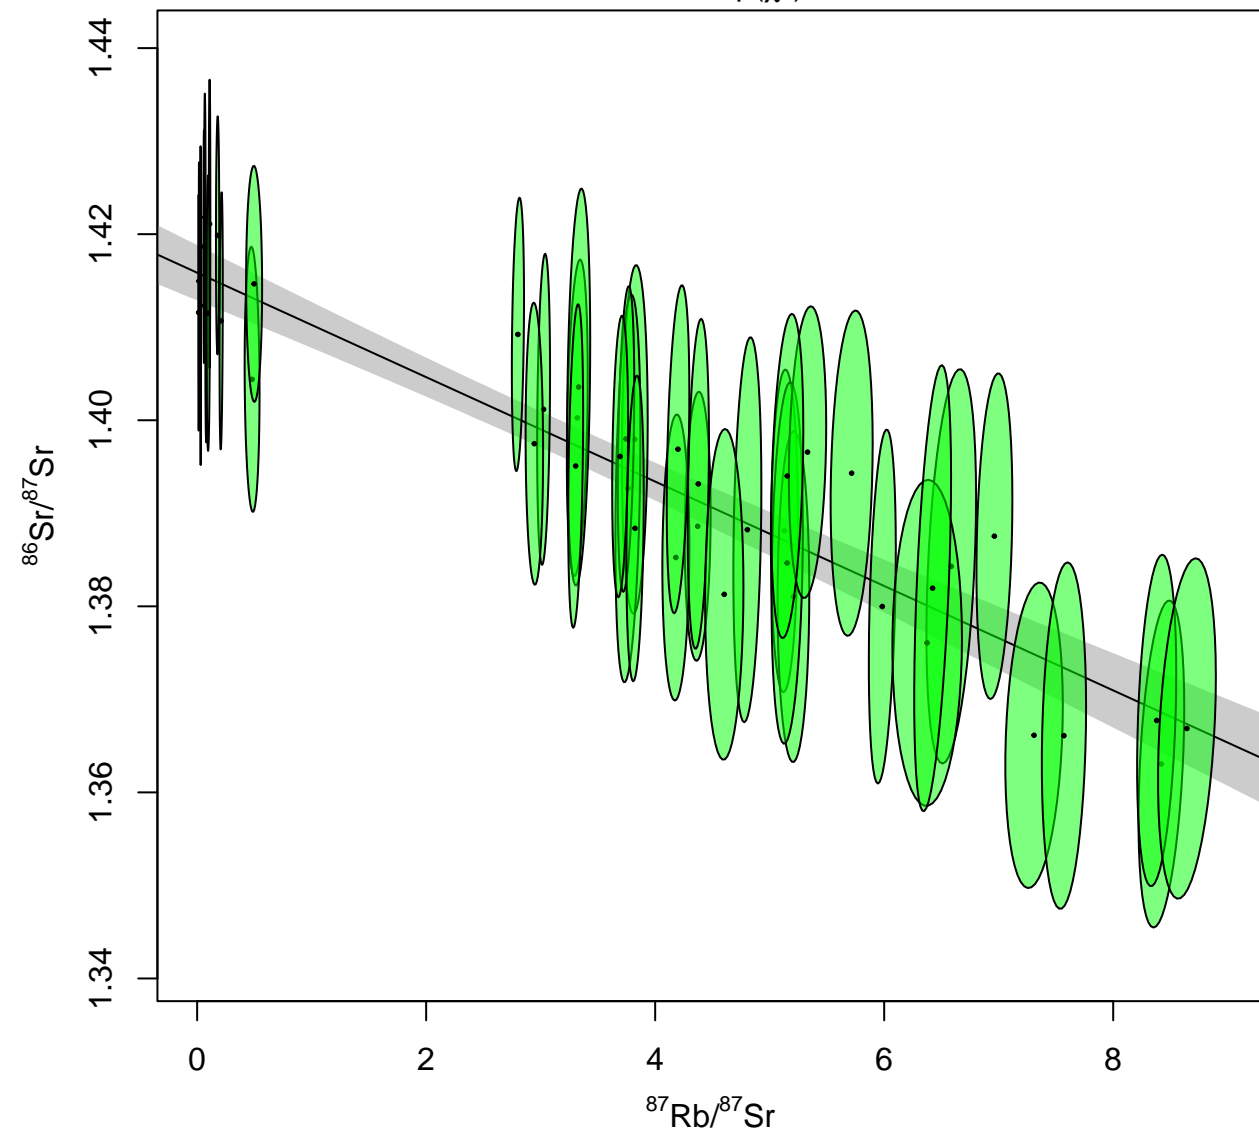

Supplement: Supplementary file 38 [file gchron-6-21-2024-supplement.zip]

age =  $327.82 \pm 2.65$  Ma (n=25)  
 $(^{86}\text{Sr}/^{87}\text{Sr})_0 = 1.37389 \pm 0.00042$   
MSWD = 0.96,  $p(\chi^2) = 0.51$

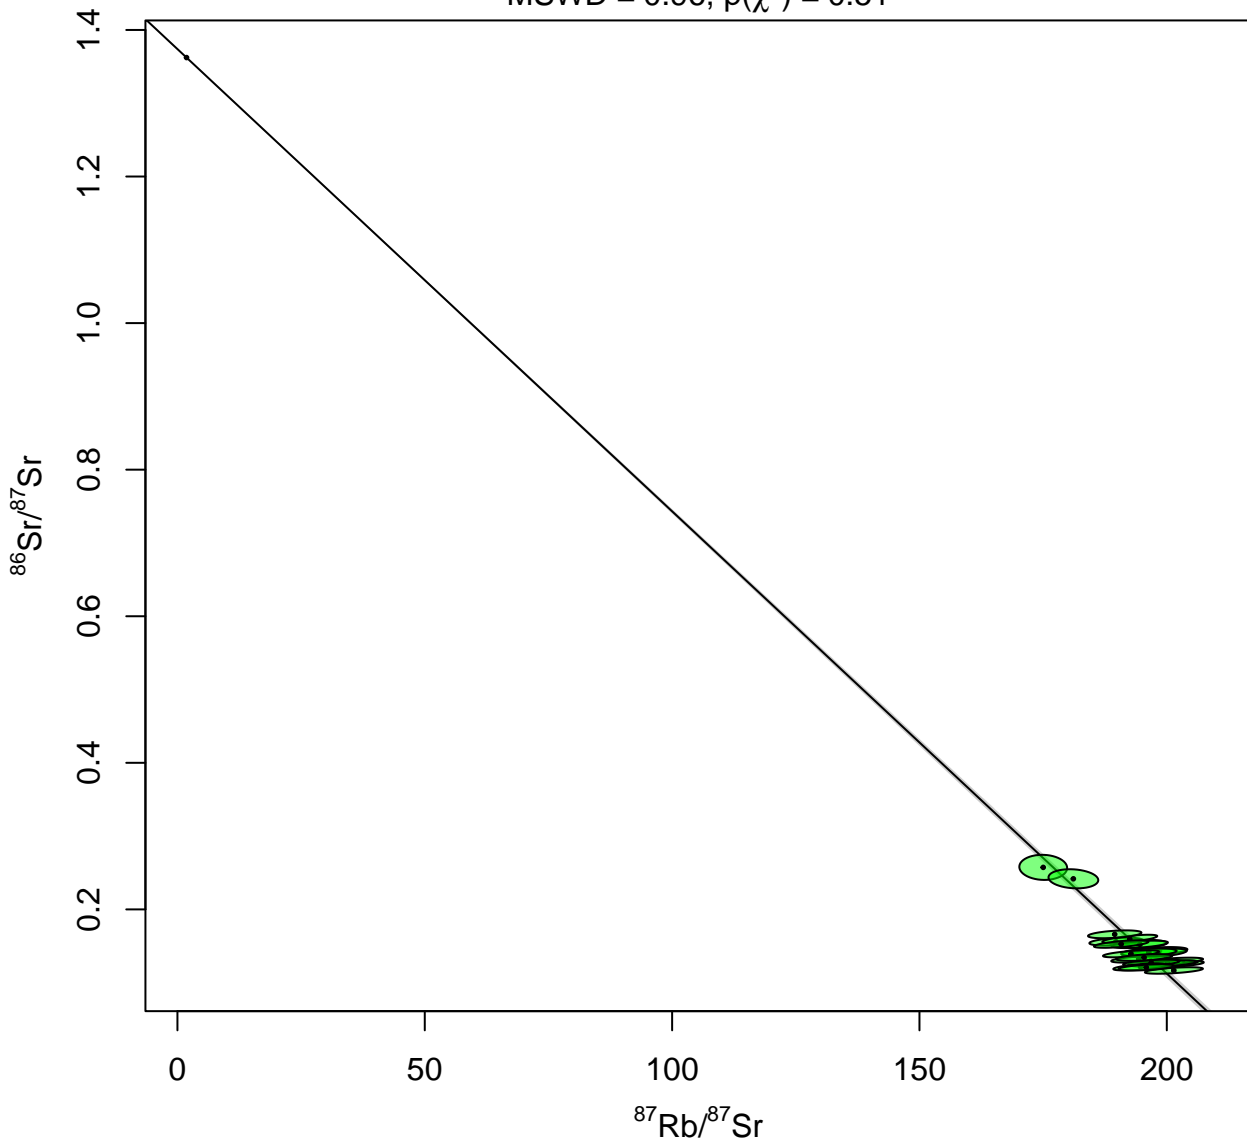

Supplement: Supplementary file 39 [file gchron-6-21-2024-supplement.zip]

age =  $280.31 \pm 2.10$  | 2.37 Ma (n=44)  
 $(^{86}\text{Sr}/^{87}\text{Sr})_0 = 1.4141 \pm 0.0056$  | 0.0074  
MSWD = 1.7,  $p(\chi^2) = 0.0044$

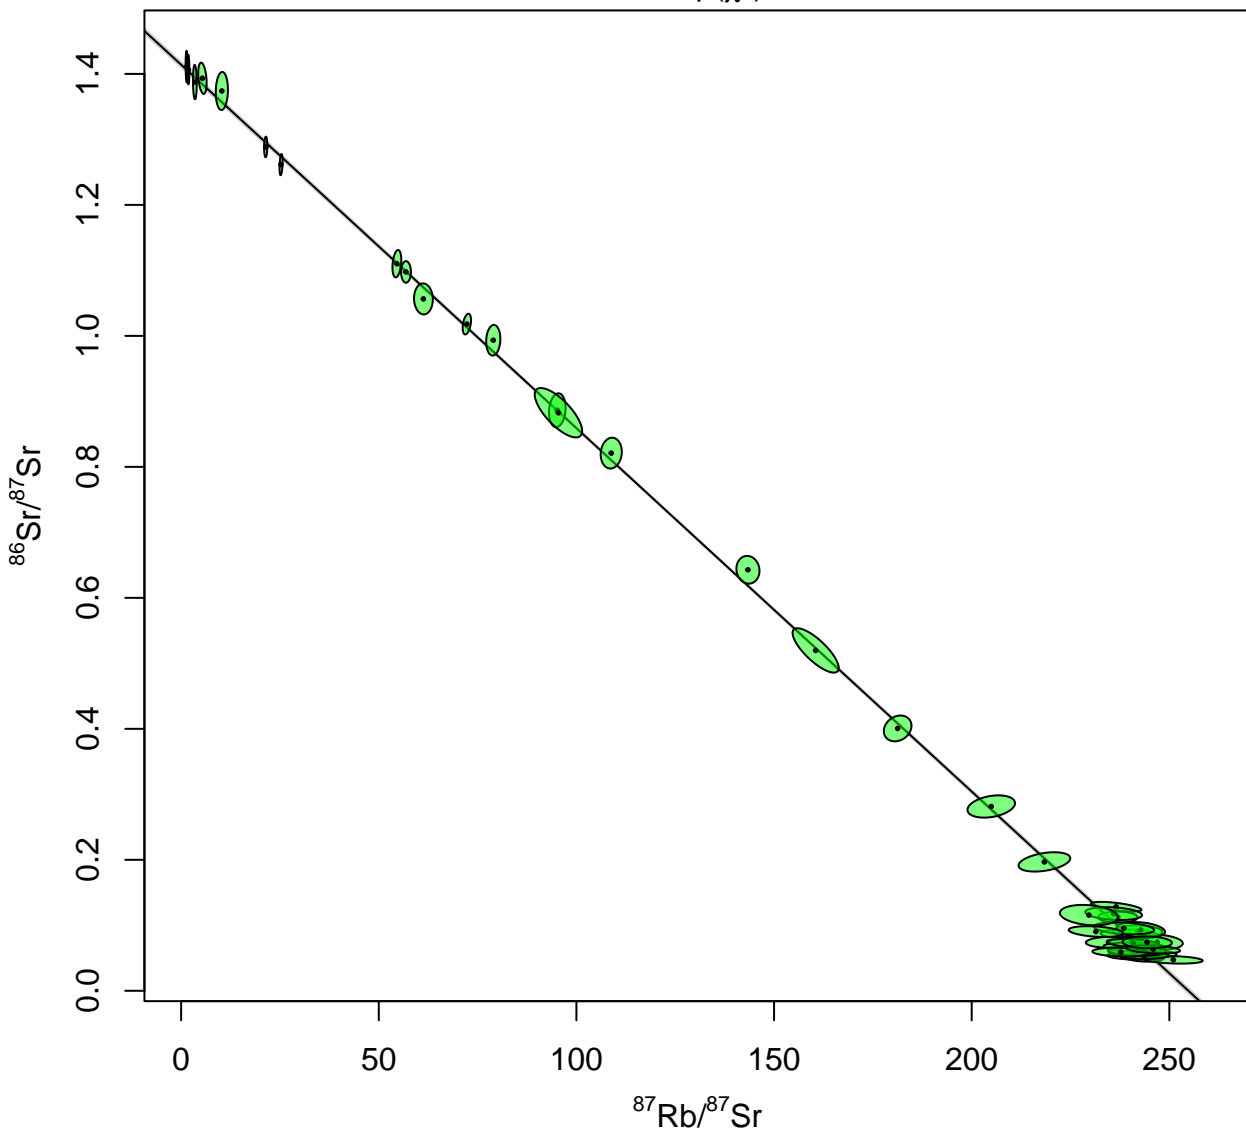

Supplement: Supplementary file 40 [file gchron-6-21-2024-supplement.zip]

age =  $316.08 \pm 3.77$  Ma (n=21)  
 $(^{86}\text{Sr}/^{87}\text{Sr})_0 = 1.37347 \pm 0.00043$   
MSWD = 0.85,  $p(\chi^2) = 0.65$

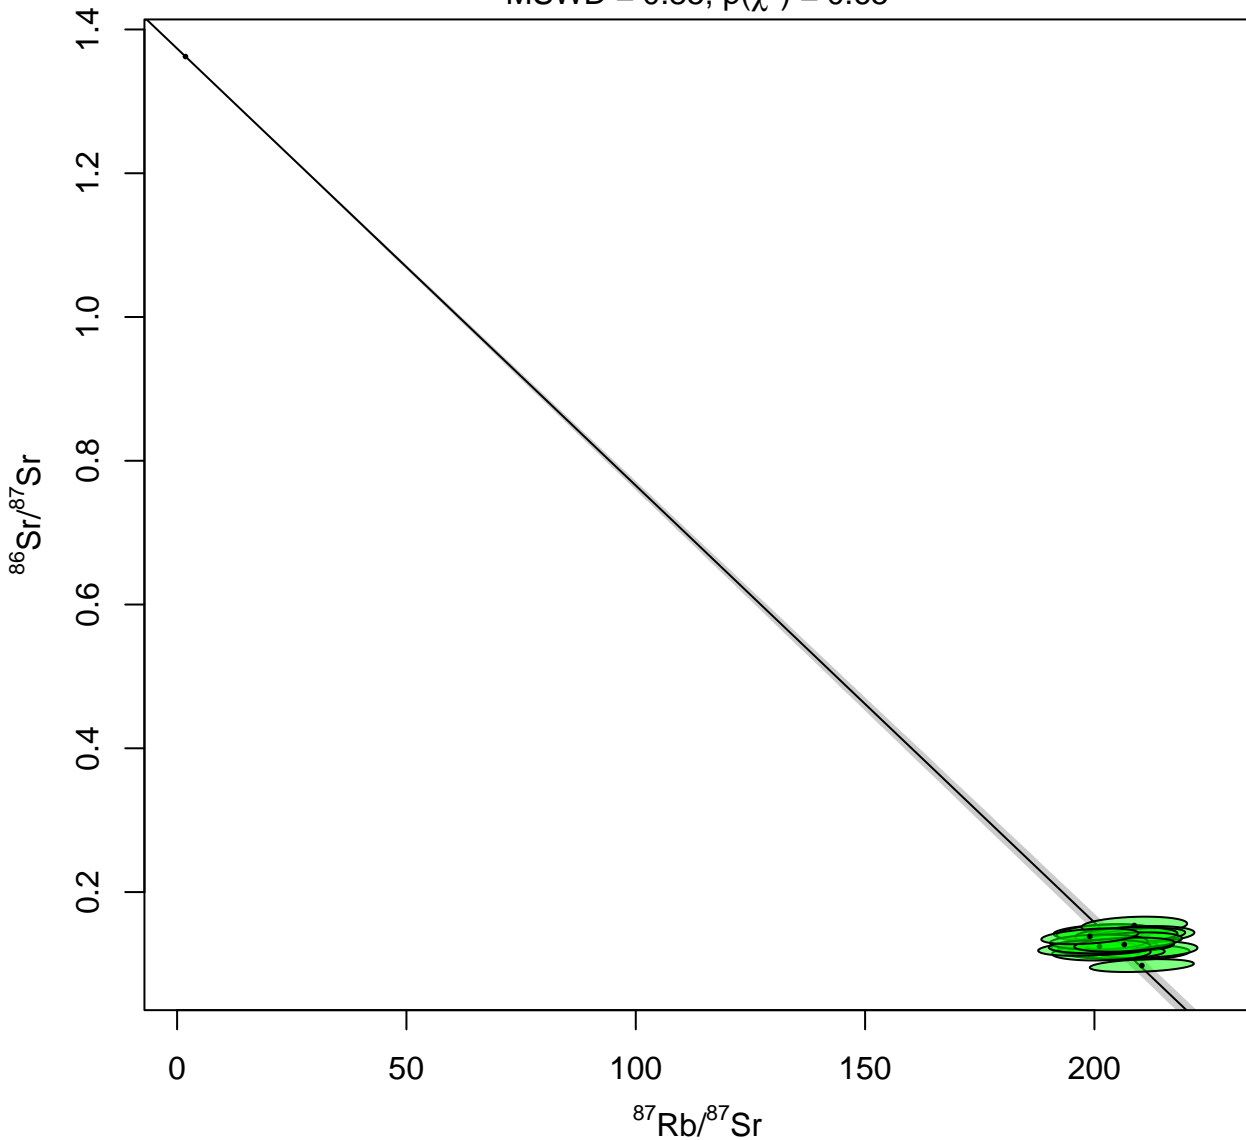

Supplement: Supplementary file 41 [file gchron-6-21-2024-supplement.zip]

age =  $280.15 \pm 2.40$  Ma (n=44)

$(^{86}\text{Sr}/^{87}\text{Sr})_0 = 1.4132 \pm 0.0089$

MSWD = 0.82,  $p(\chi^2) = 0.79$

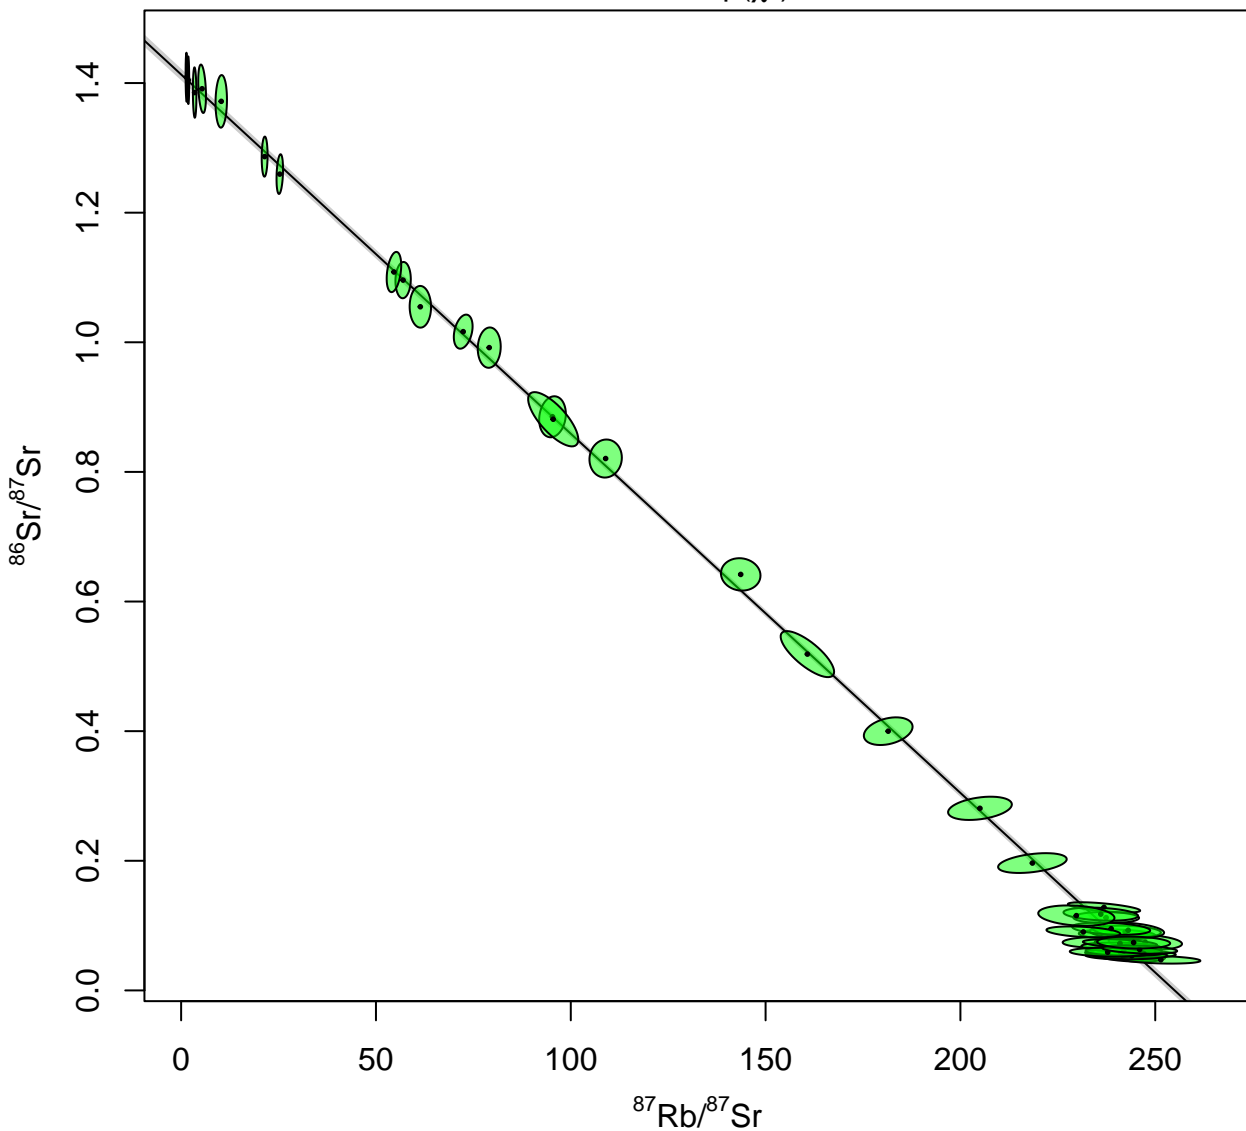

Supplement: Supplementary file 42 [file gchron-6-21-2024-supplement.zip]

age =  $288.74 \pm 3.98$  Ma (n=22)

$(^{86}\text{Sr}/^{87}\text{Sr})_0 = 1.4165 \pm 0.0040$

MSWD = 0.54,  $p(\chi^2) = 0.95$

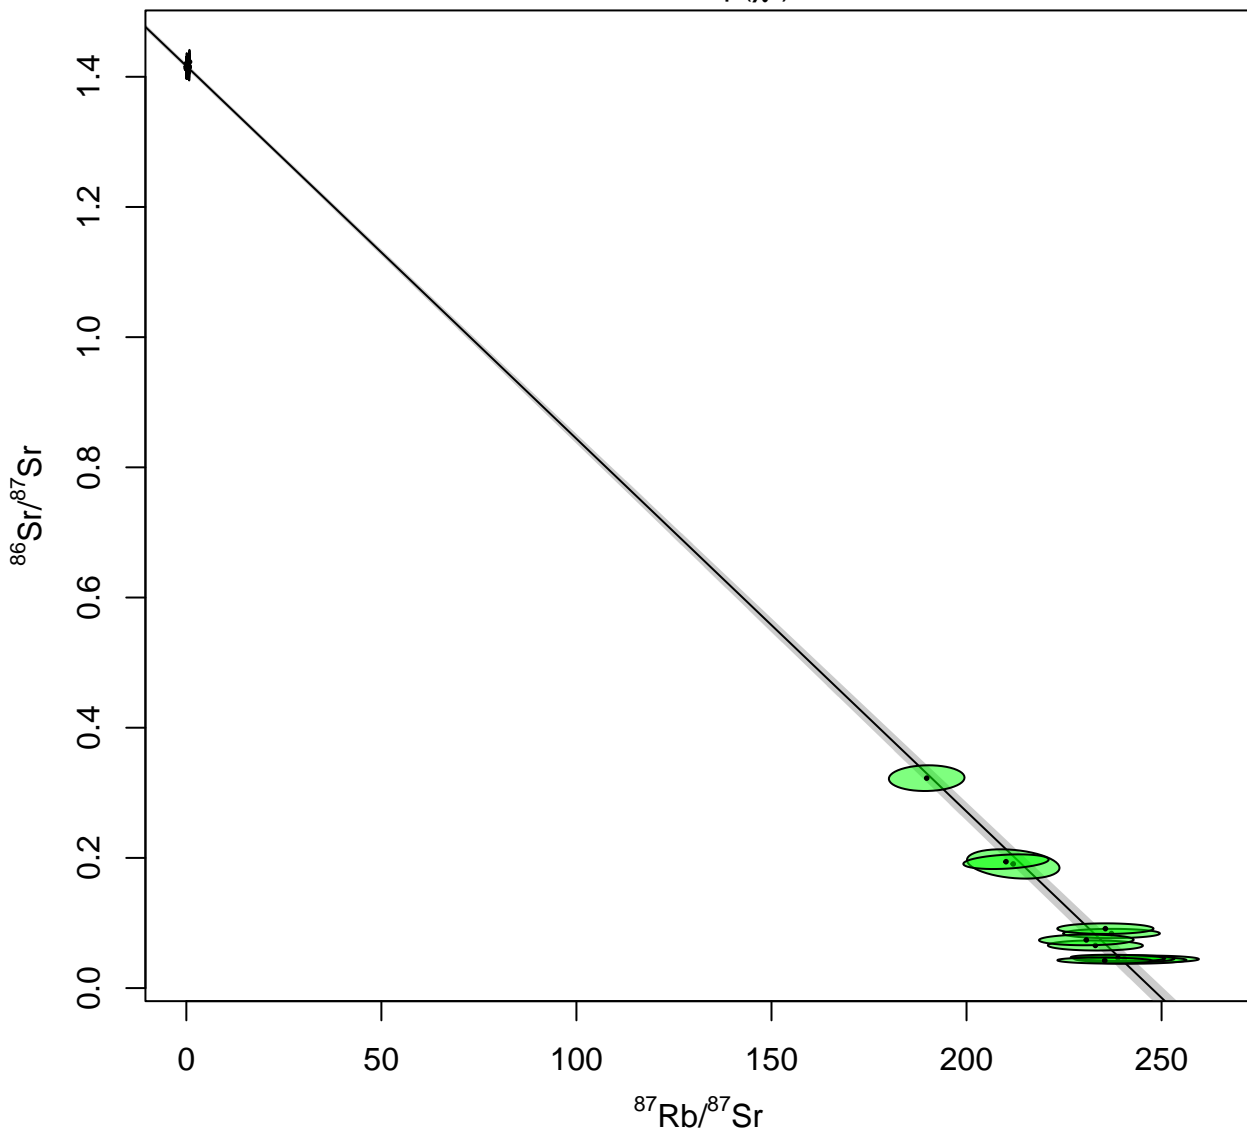

Supplement: Supplementary file 43 [file gchron-6-21-2024-supplement.zip]

age =  $283.2 \pm 74.7$  Ma (n=45)  
 $(^{86}\text{Sr}/^{87}\text{Sr})_0 = 1.4138 \pm 0.0068$   
MSWD = 0.16,  $p(\chi^2) = 1$

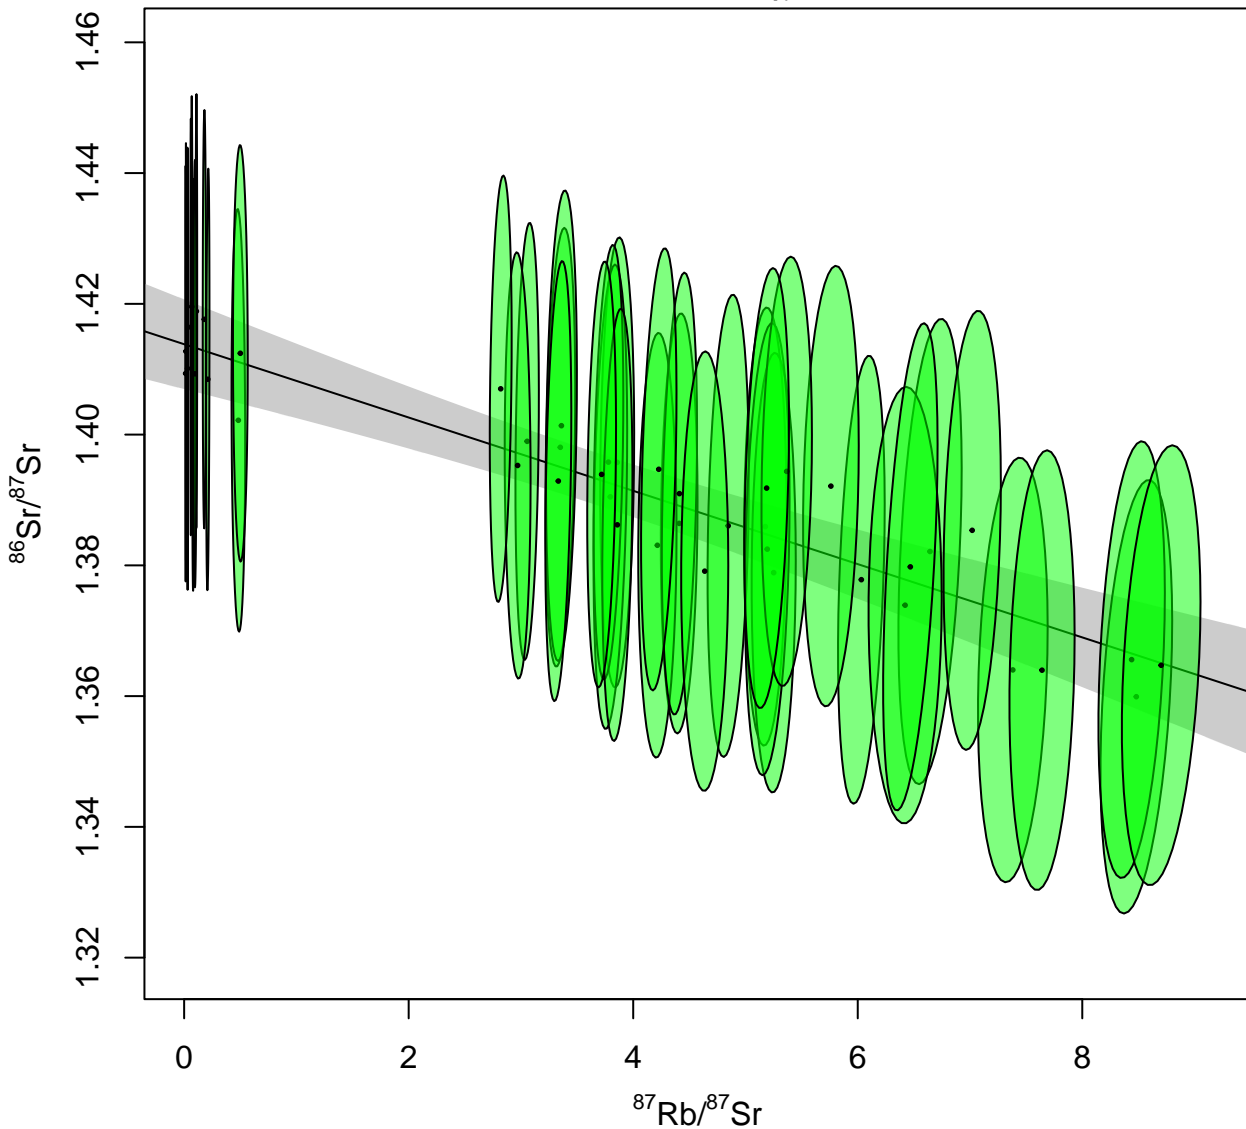

Supplement: Supplementary file 44 [file gchron-6-21-2024-supplement.zip]

age =  $280.09 \pm 2.38$  Ma (n=44)

$(^{86}\text{Sr}/^{87}\text{Sr})_0 = 1.4138 \pm 0.0060$

MSWD = 0.97,  $p(\chi^2) = 0.52$

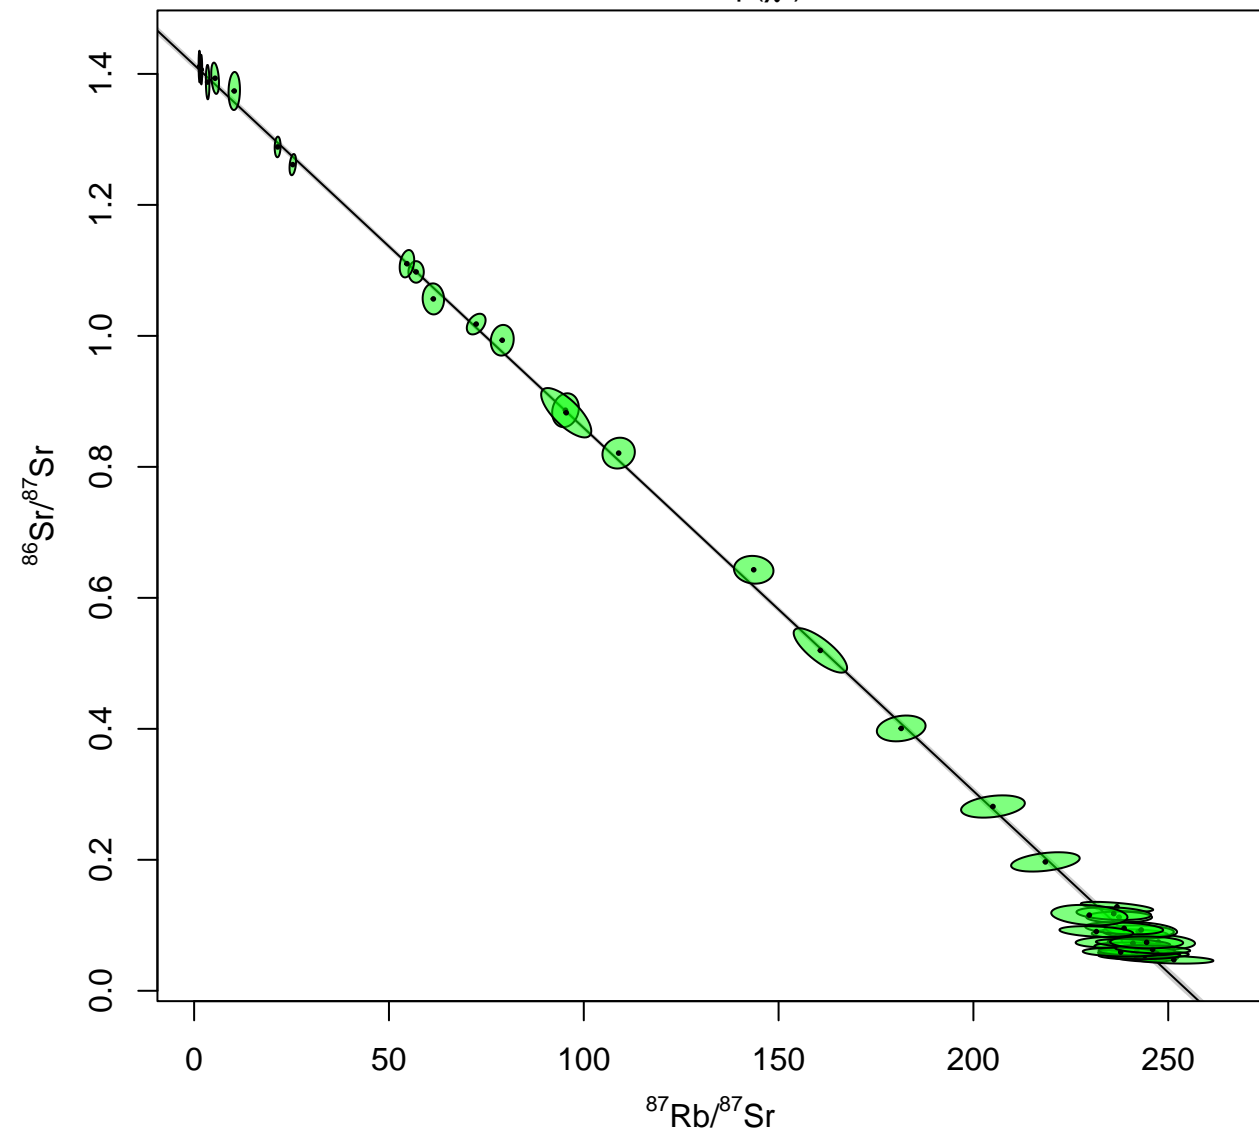

Supplement: Supplementary file 45 [file gchron-6-21-2024-supplement.zip]
